# Supplementary material for: Mapping the potential energy surfaces for ring-closing metathesis reactions of prototypical dienes by electronic structure calculations
Source: Royal Society of Chemistry journal article supplement (doi:10.1039/c0dt01314e), 2010-12-15

## Electronic Supplementary Information for:

### “Mapping the Potential Energy Surfaces for Ring-closing Metathesis Reactions of Prototypical Dienes by Electronic Structure Calculations”

Ian H. Hillier,<sup>a\*</sup> Shanthi Pandian,<sup>a†</sup> Jonathan M. Percy<sup>b\*</sup> and Mark A. Vincent<sup>a</sup>

<sup>a</sup>School of Chemistry, University of Manchester, Oxford Road, Manchester M13 9PL, UK.

<sup>b</sup>WestCHEM Department of Pure and Applied Chemistry, Thomas Graham Building, 295 Cathedral Street, Glasgow G1 1XL, UK

Fax: +44 141 548 4822; Tel: +44 141 548 4398; E-mail: [jonathan.percy@strath.ac.uk](mailto:jonathan.percy@strath.ac.uk)

Fax: +44 161 275 4734; Tel: +44 161 275 4687; E-mail: [ian.hillier@manchester.ac.uk](mailto:ian.hillier@manchester.ac.uk)

<sup>†</sup>Current address: Universitat Heidelberg, Anorganisch-Chemisches Institut, INF 270, 69120 Heidelberg (Germany).

| Contents                                                                                                                      | Pages   |
|-------------------------------------------------------------------------------------------------------------------------------|---------|
| Table of electronic, solvation and entropic energies for the complexes (lowest energy conformers)                             | S2      |
| Coordinates of the structures and free energies for the complexes (lowest energy conformers) involved in the formation of:    |         |
| Z-Cyclopentene                                                                                                                | S3-S10  |
| Z-Cyclohexene                                                                                                                 | S11-S18 |
| Z-Cycloheptene                                                                                                                | S19-S26 |
| Z-Cyclooctene                                                                                                                 | S27-S35 |
| Z-Cyclononene                                                                                                                 | S36-S44 |
| Z-Cyclodecene                                                                                                                 | S45-S53 |
| Conformers found for cycloheptene and cyclooctene                                                                             | S54     |
| Graphical representations of the structures and free energies for the complexes (lowest energy conformers) organised by type: |         |
| Alkylidene complex <b>A</b>                                                                                                   | S55     |
| Transition structure <b>AB</b> <sup>‡</sup>                                                                                   | S56     |
| $\eta^2$ -complex <b>B</b>                                                                                                    | S57     |
| Metallocyclobutane transition structure <b>BC</b> <sup>‡</sup>                                                                | S58     |
| Metallocyclobutane complex <b>C</b>                                                                                           | S59     |
| Metallocyclobutane fragmentation transition structure <b>CD</b> <sup>‡</sup>                                                  | S60     |
| Product $\eta^2$ -complex <b>D</b>                                                                                            | S61     |

The coordinates of the structures A, B, BC, C, CD and D (Table 1 and Scheme 1, with BC and CD being transition structures linking B and C, and C and D, respectively) that lead to the cycloalkenes (Z-cyclopentene to Z-cyclodecene). Each set of structures is designated by the number of carbons in the product alkene (i.e. five, six, seven, eight, nine and ten) and the point on the potential energy surface (i.e. A, B, BC, C, CD and D). The free energy (which includes solvation, rotational, translational and vibrational effects) is also given. The units used are Ångstroms, for coordinates, and unless otherwise stated, Hartrees for the free energies.

| <b>Molecule</b>         | <b>Electronic Energy (B2)</b> | <b>Solvation Energy (B2)</b> | <b>Entropic Energy<sup>a</sup></b> |
|-------------------------|-------------------------------|------------------------------|------------------------------------|
| A for 5 membered ring   | -2175.63850                   | -0.01834                     | -0.10900                           |
| A for 6 membered ring   | -2214.95585                   | -0.01866                     | -0.11234                           |
| A for 7 membered ring   | -2254.27328                   | -0.01898                     | -0.11540                           |
| A for 8 membered ring   | -2293.59063                   | -0.01897                     | -0.11852                           |
| A for 9 membered ring   | -2332.90788                   | -0.01921                     | -0.12258                           |
| A for 10 membered ring  | -2372.22526                   | -0.01930                     | -0.12559                           |
| B for 5 membered ring   | -2175.66211                   | -0.01876                     | -0.10351                           |
| B for 6 membered ring   | -2214.97224                   | -0.019006                    | -0.10617                           |
| B for 7 membered ring   | -2254.29288                   | -0.01884                     | -0.10837                           |
| B for 8 membered ring   | 2293.60804                    | -0.01928                     | -0.10901                           |
| B for 9 membered ring   | -2332.91868                   | -0.01891                     | -0.11426                           |
| B for 10 membered ring  | -2372.24342                   | -0.01896                     | -0.11482                           |
| BC for 5 membered ring  | -2175.65850                   | -0.01964                     | -0.10014                           |
| BC for 6 membered ring  | -2214.97038                   | -0.01883                     | -0.10366                           |
| BC for 7 membered ring  | -2254.28595                   | -0.01920                     | -0.10548                           |
| BC for 8 membered ring  | -2293.60122                   | -0.01922                     | -0.10731                           |
| BC for 9 membered ring  | -2332.91253                   | -0.01914                     | -0.10973                           |
| BC for 10 membered ring | -2372.23271                   | -0.01977                     | -0.11146                           |
| C for 5 membered ring   | -2175.66386                   | -0.01915                     | -0.10074                           |
| C for 6 membered ring   | -2214.98055                   | -0.01923                     | -0.10529                           |
| C for 7 membered ring   | -2254.29842                   | -0.01979                     | -0.10536                           |
| C for 8 membered ring   | -2293.61178                   | -0.01914                     | -0.10707                           |
| C for 9 membered ring   | -2332.92259                   | -0.01938                     | -0.11184                           |
| C for 10 membered ring  | -2372.24093                   | -0.01995                     | -0.11179                           |
| CD for 5 membered ring  | -2175.64005                   | -0.01887                     | -0.10041                           |
| CD for 6 membered ring  | -2214.96359                   | -0.01855                     | -0.10289                           |
| CD for 7 membered ring  | -2254.27947                   | -0.01932                     | -0.10698                           |
| CD for 8 membered ring  | -2293.59484                   | -0.01964                     | -0.10922                           |
| CD for 9 membered ring  | -2332.90596                   | -0.01965                     | -0.11037                           |
| CD for 10 membered ring | -2372.22862                   | -0.01997                     | -0.11225                           |
| D for 5 membered ring   | -2175.64562                   | -0.01853                     | -0.10606                           |
| D for 6 membered ring   | -2214.96996                   | -0.01840                     | -0.10581                           |
| D for 7 membered ring   | -2254.28279                   | -0.01862                     | -0.10823                           |
| D for 8 membered ring   | -2293.59895                   | -0.01909                     | -0.11136                           |
| D for 9 membered ring   | -2332.91133                   | -0.01905                     | -0.11377                           |
| D for 10 membered ring  | -2372.23617                   | -0.01926                     | -0.11490                           |

## Z-Cyclopentene formation

Five A            Free Energy = -2175.155185

|    |    |   |           |           |           |
|----|----|---|-----------|-----------|-----------|
| 1  | 44 | 0 | -0.508283 | -0.337861 | -0.934876 |
| 2  | 17 | 0 | 0.137242  | -0.561593 | -3.160840 |
| 3  | 17 | 0 | -0.997090 | -1.378879 | 1.103750  |
| 4  | 6  | 0 | -3.260865 | -0.035170 | -1.337601 |
| 5  | 1  | 0 | -3.700474 | 0.276651  | -2.297403 |
| 6  | 6  | 0 | -5.562271 | -0.467498 | -0.334774 |
| 7  | 1  | 0 | -6.048709 | -0.179464 | -1.274949 |
| 8  | 6  | 0 | -4.230060 | 0.266034  | -0.188921 |
| 9  | 1  | 0 | -4.405176 | 1.348569  | -0.137078 |
| 10 | 1  | 0 | -3.751311 | -0.013282 | 0.758067  |
| 11 | 1  | 0 | -3.104024 | -1.121749 | -1.411229 |
| 12 | 6  | 0 | 0.869997  | 0.854128  | -0.312187 |
| 13 | 7  | 0 | 0.896582  | 2.204164  | -0.147484 |
| 14 | 7  | 0 | 2.101778  | 0.383970  | 0.038241  |
| 15 | 6  | 0 | 2.154058  | 2.672578  | 0.444231  |
| 16 | 1  | 0 | 2.534404  | 3.542409  | -0.099355 |
| 17 | 1  | 0 | 1.991345  | 2.979166  | 1.486152  |
| 18 | 6  | 0 | 3.056086  | 1.450603  | 0.331327  |
| 19 | 1  | 0 | 3.787083  | 1.542583  | -0.483270 |
| 20 | 1  | 0 | 3.607299  | 1.235008  | 1.251928  |
| 21 | 6  | 0 | 2.515943  | -0.973926 | -0.130870 |
| 22 | 6  | 0 | 3.232976  | -3.647777 | -0.473086 |
| 23 | 6  | 0 | 2.432469  | -1.849457 | 0.963409  |
| 24 | 6  | 0 | 3.041431  | -1.389002 | -1.366133 |
| 25 | 6  | 0 | 3.376357  | -2.732659 | -1.514495 |
| 26 | 6  | 0 | 2.782449  | -3.182619 | 0.760310  |
| 27 | 1  | 0 | 3.761967  | -3.071501 | -2.473284 |
| 28 | 1  | 0 | 2.698914  | -3.876708 | 1.593560  |
| 29 | 6  | 0 | -0.235847 | 3.069433  | -0.176047 |
| 30 | 6  | 0 | -2.484842 | 4.709334  | -0.280347 |
| 31 | 6  | 0 | -0.494087 | 3.791991  | -1.344641 |
| 32 | 6  | 0 | -1.077971 | 3.137519  | 0.941577  |
| 33 | 6  | 0 | -2.195265 | 3.965642  | 0.865129  |
| 34 | 6  | 0 | -1.624470 | 4.609586  | -1.372697 |
| 35 | 1  | 0 | -2.868034 | 4.017303  | 1.718494  |
| 36 | 1  | 0 | -1.846518 | 5.169278  | -2.278395 |
| 37 | 6  | 0 | 0.371941  | 3.608596  | -2.551690 |
| 38 | 1  | 0 | 1.426463  | 3.806999  | -2.336424 |
| 39 | 1  | 0 | 0.065033  | 4.269504  | -3.363734 |
| 40 | 1  | 0 | 0.318384  | 2.575448  | -2.914780 |
| 41 | 6  | 0 | -0.840251 | 2.274049  | 2.140209  |
| 42 | 1  | 0 | -1.000649 | 1.216811  | 1.896768  |
| 43 | 1  | 0 | -1.516696 | 2.537408  | 2.954978  |
| 44 | 1  | 0 | 0.183603  | 2.353320  | 2.518530  |
| 45 | 6  | 0 | 3.319059  | -0.421156 | -2.475792 |
| 46 | 1  | 0 | 4.361324  | -0.081957 | -2.427789 |
| 47 | 1  | 0 | 2.673327  | 0.457342  | -2.443440 |
| 48 | 1  | 0 | 3.172819  | -0.888442 | -3.450477 |
| 49 | 6  | 0 | 2.045727  | -1.377771 | 2.331434  |
| 50 | 1  | 0 | 1.483981  | -0.444120 | 2.307668  |
| 51 | 1  | 0 | 2.942895  | -1.220248 | 2.942753  |
| 52 | 1  | 0 | 1.427618  | -2.117587 | 2.842861  |
| 53 | 6  | 0 | -3.692155 | 5.595668  | -0.325924 |
| 54 | 1  | 0 | -3.919629 | 5.916735  | -1.344003 |

|    |   |   |           |           |           |
|----|---|---|-----------|-----------|-----------|
| 55 | 1 | 0 | -3.543815 | 6.497888  | 0.276607  |
| 56 | 1 | 0 | -4.575560 | 5.091327  | 0.074932  |
| 57 | 6 | 0 | 3.545350  | -5.098080 | -0.678312 |
| 58 | 1 | 0 | 2.665180  | -5.638872 | -1.042060 |
| 59 | 1 | 0 | 3.855795  | -5.580531 | 0.251061  |
| 60 | 1 | 0 | 4.335886  | -5.241453 | -1.418125 |
| 61 | 6 | 0 | -1.976788 | 0.691421  | -1.124494 |
| 62 | 1 | 0 | -2.043501 | 1.783282  | -1.097600 |
| 63 | 6 | 0 | -6.481752 | -0.213319 | 0.812189  |
| 64 | 1 | 0 | -6.108459 | -0.514500 | 1.792171  |
| 65 | 6 | 0 | -7.679200 | 0.356423  | 0.724400  |
| 66 | 1 | 0 | -8.087720 | 0.673453  | -0.231989 |
| 67 | 1 | 0 | -8.301358 | 0.522947  | 1.597083  |
| 68 | 1 | 0 | -5.357795 | -1.544817 | -0.409451 |

Five B Free Energy = -2175.173473

|    |    |   |           |           |           |
|----|----|---|-----------|-----------|-----------|
| 1  | 44 | 0 | -0.408964 | -0.741531 | 0.206990  |
| 2  | 17 | 0 | -0.627399 | -1.180287 | -2.177652 |
| 3  | 17 | 0 | -0.132200 | -0.674073 | 2.612525  |
| 4  | 6  | 0 | -3.125543 | 0.252607  | -0.535740 |
| 5  | 1  | 0 | -3.668682 | 1.202650  | -0.448819 |
| 6  | 6  | 0 | -3.346511 | -2.251860 | -0.195688 |
| 7  | 1  | 0 | -4.069315 | -3.037986 | 0.065839  |
| 8  | 1  | 0 | -3.031379 | -2.440121 | -1.227817 |
| 9  | 6  | 0 | -4.043640 | -0.900867 | -0.085362 |
| 10 | 1  | 0 | -4.951875 | -0.891507 | -0.696016 |
| 11 | 1  | 0 | -4.363247 | -0.733477 | 0.951572  |
| 12 | 1  | 0 | -2.851146 | 0.096852  | -1.583587 |
| 13 | 6  | 0 | 0.951564  | 0.714575  | 0.030324  |
| 14 | 7  | 0 | 0.872074  | 2.056086  | -0.081398 |
| 15 | 7  | 0 | 2.262698  | 0.377804  | 0.078577  |
| 16 | 6  | 0 | 2.194065  | 2.696024  | -0.000637 |
| 17 | 1  | 0 | 2.300098  | 3.457389  | -0.777964 |
| 18 | 1  | 0 | 2.316262  | 3.187871  | 0.972299  |
| 19 | 6  | 0 | 3.146282  | 1.517026  | -0.173822 |
| 20 | 1  | 0 | 3.562717  | 1.461409  | -1.188888 |
| 21 | 1  | 0 | 3.979587  | 1.528998  | 0.534470  |
| 22 | 6  | 0 | 2.667476  | -0.993659 | 0.003129  |
| 23 | 6  | 0 | 3.243646  | -3.719360 | -0.130648 |
| 24 | 6  | 0 | 2.999286  | -1.678679 | 1.183148  |
| 25 | 6  | 0 | 2.721793  | -1.621918 | -1.254714 |
| 26 | 6  | 0 | 2.993876  | -2.986705 | -1.291008 |
| 27 | 6  | 0 | 3.268722  | -3.044409 | 1.087499  |
| 28 | 1  | 0 | 3.011808  | -3.488849 | -2.255684 |
| 29 | 1  | 0 | 3.506628  | -3.593046 | 1.996107  |
| 30 | 6  | 0 | -0.329188 | 2.824515  | -0.131897 |
| 31 | 6  | 0 | -2.673738 | 4.326593  | -0.259300 |
| 32 | 6  | 0 | -0.935065 | 3.037082  | -1.378712 |
| 33 | 6  | 0 | -0.860993 | 3.355914  | 1.049998  |
| 34 | 6  | 0 | -2.034670 | 4.103565  | 0.959309  |
| 35 | 6  | 0 | -2.106450 | 3.789950  | -1.415299 |
| 36 | 1  | 0 | -2.465665 | 4.512799  | 1.870265  |
| 37 | 1  | 0 | -2.589893 | 3.958445  | -2.375200 |
| 38 | 6  | 0 | -0.354431 | 2.445209  | -2.622961 |
| 39 | 1  | 0 | 0.711002  | 2.676992  | -2.725467 |
| 40 | 1  | 0 | -0.866736 | 2.818884  | -3.511251 |
| 41 | 1  | 0 | -0.438585 | 1.351487  | -2.617871 |

|    |   |   |           |           |           |
|----|---|---|-----------|-----------|-----------|
| 42 | 6 | 0 | -0.219236 | 3.079769  | 2.373340  |
| 43 | 1 | 0 | -0.040608 | 2.007185  | 2.516589  |
| 44 | 1 | 0 | -0.848794 | 3.428280  | 3.193630  |
| 45 | 1 | 0 | 0.748141  | 3.584344  | 2.472062  |
| 46 | 6 | 0 | 2.582789  | -0.848814 | -2.529661 |
| 47 | 1 | 0 | 3.563861  | -0.474442 | -2.848682 |
| 48 | 1 | 0 | 1.906198  | 0.001170  | -2.436305 |
| 49 | 1 | 0 | 2.192145  | -1.478185 | -3.329707 |
| 50 | 6 | 0 | 3.143819  | -0.974292 | 2.495715  |
| 51 | 1 | 0 | 2.607581  | -0.026366 | 2.517418  |
| 52 | 1 | 0 | 4.204457  | -0.780358 | 2.697810  |
| 53 | 1 | 0 | 2.758427  | -1.581625 | 3.316324  |
| 54 | 6 | 0 | -3.956911 | 5.097300  | -0.327287 |
| 55 | 1 | 0 | -4.816037 | 4.424434  | -0.425549 |
| 56 | 1 | 0 | -3.981155 | 5.765945  | -1.191298 |
| 57 | 1 | 0 | -4.116994 | 5.697419  | 0.570432  |
| 58 | 6 | 0 | 3.469931  | -5.198582 | -0.194384 |
| 59 | 1 | 0 | 2.516775  | -5.738156 | -0.213822 |
| 60 | 1 | 0 | 4.027167  | -5.560791 | 0.671944  |
| 61 | 1 | 0 | 4.015332  | -5.486795 | -1.095992 |
| 62 | 6 | 0 | -0.986396 | -2.970382 | 0.388626  |
| 63 | 1 | 0 | -0.269449 | -3.229540 | 1.165560  |
| 64 | 1 | 0 | -0.827023 | -3.372267 | -0.608430 |
| 65 | 6 | 0 | -2.180326 | -2.396249 | 0.724465  |
| 66 | 1 | 0 | -2.344370 | -2.135051 | 1.770888  |
| 67 | 6 | 0 | -1.913021 | 0.295528  | 0.323504  |
| 68 | 1 | 0 | -1.993979 | 0.942194  | 1.213862  |

Five BC            Free Energy= -2175.168000

|    |    |   |           |           |           |
|----|----|---|-----------|-----------|-----------|
| 1  | 44 | 0 | -0.134174 | 0.783508  | 0.412360  |
| 2  | 17 | 0 | 0.444707  | 0.160456  | 2.684896  |
| 3  | 17 | 0 | -0.924615 | 1.501762  | -1.774245 |
| 4  | 6  | 0 | -1.186899 | 2.430460  | 1.220498  |
| 5  | 1  | 0 | -1.925446 | 2.755873  | 0.489422  |
| 6  | 1  | 0 | -1.549863 | 2.107640  | 2.193462  |
| 7  | 6  | 0 | 1.534679  | 1.599735  | 0.329453  |
| 8  | 1  | 0 | 2.187602  | 1.437458  | 1.202348  |
| 9  | 6  | 0 | 0.120483  | 2.978162  | 1.138616  |
| 10 | 1  | 0 | 0.687556  | 2.969132  | 2.071590  |
| 11 | 6  | 0 | 2.116568  | 2.459481  | -0.743618 |
| 12 | 1  | 0 | 1.610205  | 2.307138  | -1.699035 |
| 13 | 1  | 0 | 3.179511  | 2.216807  | -0.859533 |
| 14 | 6  | 0 | 0.474517  | 4.048170  | 0.141102  |
| 15 | 1  | 0 | -0.187362 | 3.961431  | -0.726624 |
| 16 | 1  | 0 | 0.284907  | 5.024702  | 0.602576  |
| 17 | 6  | 0 | 1.928229  | 3.912527  | -0.283274 |
| 18 | 1  | 0 | 2.199114  | 4.617789  | -1.074338 |
| 19 | 1  | 0 | 2.586607  | 4.117546  | 0.570641  |
| 20 | 6  | 0 | -0.169226 | -1.176239 | -0.145435 |
| 21 | 7  | 0 | -1.313964 | -1.843083 | -0.386501 |
| 22 | 7  | 0 | 0.856674  | -2.042522 | -0.253831 |
| 23 | 6  | 0 | -1.092899 | -3.289200 | -0.500047 |
| 24 | 1  | 0 | -1.379927 | -3.784172 | 0.438199  |
| 25 | 1  | 0 | -1.691586 | -3.717166 | -1.307142 |
| 26 | 6  | 0 | 0.405139  | -3.350635 | -0.755906 |
| 27 | 1  | 0 | 0.904711  | -4.164302 | -0.226017 |
| 28 | 1  | 0 | 0.643042  | -3.442634 | -1.824633 |

|    |   |   |           |           |           |
|----|---|---|-----------|-----------|-----------|
| 29 | 6 | 0 | 2.240545  | -1.693404 | -0.190686 |
| 30 | 6 | 0 | 4.933642  | -0.998703 | -0.032087 |
| 31 | 6 | 0 | 2.827880  | -1.008908 | -1.261884 |
| 32 | 6 | 0 | 2.973241  | -2.068202 | 0.943688  |
| 33 | 6 | 0 | 4.316391  | -1.706822 | 1.000207  |
| 34 | 6 | 0 | 4.176469  | -0.666690 | -1.153371 |
| 35 | 1 | 0 | 4.894734  | -1.981337 | 1.879398  |
| 36 | 1 | 0 | 4.646919  | -0.130659 | -1.975042 |
| 37 | 6 | 0 | -2.606073 | -1.236102 | -0.304712 |
| 38 | 6 | 0 | -5.056163 | 0.088984  | -0.230572 |
| 39 | 6 | 0 | -3.165879 | -0.920454 | 0.938561  |
| 40 | 6 | 0 | -3.270875 | -0.957068 | -1.512010 |
| 41 | 6 | 0 | -4.491128 | -0.301306 | -1.449189 |
| 42 | 6 | 0 | -4.387586 | -0.236119 | 0.942183  |
| 43 | 1 | 0 | -5.004105 | -0.058426 | -2.376964 |
| 44 | 1 | 0 | -4.829839 | 0.031522  | 1.899780  |
| 45 | 6 | 0 | -2.556126 | -1.344158 | 2.240644  |
| 46 | 1 | 0 | -3.233861 | -2.028081 | 2.762667  |
| 47 | 1 | 0 | -2.380173 | -0.494259 | 2.904975  |
| 48 | 1 | 0 | -1.591961 | -1.838791 | 2.124274  |
| 49 | 6 | 0 | -2.650674 | -1.321688 | -2.823641 |
| 50 | 1 | 0 | -3.261818 | -0.969625 | -3.656027 |
| 51 | 1 | 0 | -2.533675 | -2.405443 | -2.936071 |
| 52 | 1 | 0 | -1.659760 | -0.866579 | -2.917390 |
| 53 | 6 | 0 | 2.321572  | -2.819914 | 2.060890  |
| 54 | 1 | 0 | 1.962047  | -3.802091 | 1.734411  |
| 55 | 1 | 0 | 1.462202  | -2.264355 | 2.448092  |
| 56 | 1 | 0 | 3.019761  | -2.983563 | 2.883059  |
| 57 | 6 | 0 | 2.037385  | -0.654687 | -2.483697 |
| 58 | 1 | 0 | 1.209771  | 0.029811  | -2.263522 |
| 59 | 1 | 0 | 1.588192  | -1.541271 | -2.944782 |
| 60 | 1 | 0 | 2.672301  | -0.180606 | -3.234702 |
| 61 | 6 | 0 | -6.350600 | 0.842238  | -0.203378 |
| 62 | 1 | 0 | -6.729925 | 0.958951  | 0.813328  |
| 63 | 1 | 0 | -7.120884 | 0.339508  | -0.795047 |
| 64 | 1 | 0 | -6.231903 | 1.843663  | -0.628984 |
| 65 | 6 | 0 | 6.376174  | -0.606181 | 0.071113  |
| 66 | 1 | 0 | 6.526763  | 0.152760  | 0.845535  |
| 67 | 1 | 0 | 6.751722  | -0.196372 | -0.868167 |
| 68 | 1 | 0 | 7.006086  | -1.458183 | 0.341341  |

Five C Free Energy = -2175.171237

|    |    |   |           |          |           |
|----|----|---|-----------|----------|-----------|
| 1  | 44 | 0 | -0.057572 | 0.782994 | 0.141920  |
| 2  | 17 | 0 | -0.886641 | 0.494102 | 2.400702  |
| 3  | 17 | 0 | 0.613455  | 1.141175 | -2.166701 |
| 4  | 6  | 0 | -1.141214 | 2.438952 | 0.087749  |
| 5  | 1  | 0 | -1.361913 | 2.782863 | -0.924787 |
| 6  | 1  | 0 | -1.973980 | 2.464203 | 0.789550  |
| 7  | 6  | 0 | 1.379806  | 1.828665 | 0.909777  |
| 8  | 1  | 0 | 1.471694  | 1.655268 | 1.987216  |
| 9  | 6  | 0 | 0.193557  | 2.948979 | 0.636143  |
| 10 | 1  | 0 | -0.000460 | 3.280261 | 1.661283  |
| 11 | 6  | 0 | 2.628367  | 2.336824 | 0.220679  |
| 12 | 1  | 0 | 2.745084  | 1.876269 | -0.763435 |
| 13 | 1  | 0 | 3.514435  | 2.093000 | 0.813987  |
| 14 | 6  | 0 | 0.915953  | 3.960704 | -0.253627 |
| 15 | 1  | 0 | 0.744320  | 3.690316 | -1.299464 |

|    |   |   |           |           |           |
|----|---|---|-----------|-----------|-----------|
| 16 | 1 | 0 | 0.509660  | 4.963837  | -0.095964 |
| 17 | 6 | 0 | 2.397472  | 3.844863  | 0.081482  |
| 18 | 1 | 0 | 3.042591  | 4.305668  | -0.671517 |
| 19 | 1 | 0 | 2.607203  | 4.342845  | 1.036627  |
| 20 | 6 | 0 | -0.277674 | -1.190186 | -0.272772 |
| 21 | 7 | 0 | -1.438226 | -1.831011 | -0.462122 |
| 22 | 7 | 0 | 0.738686  | -2.051839 | -0.419098 |
| 23 | 6 | 0 | -1.240969 | -3.248576 | -0.800534 |
| 24 | 1 | 0 | -1.799568 | -3.882793 | -0.106181 |
| 25 | 1 | 0 | -1.613838 | -3.448801 | -1.811365 |
| 26 | 6 | 0 | 0.275632  | -3.421539 | -0.678272 |
| 27 | 1 | 0 | 0.565893  | -4.081793 | 0.147426  |
| 28 | 1 | 0 | 0.734465  | -3.808967 | -1.592860 |
| 29 | 6 | 0 | 2.116318  | -1.672650 | -0.343347 |
| 30 | 6 | 0 | 4.752008  | -0.789828 | -0.185001 |
| 31 | 6 | 0 | 2.836695  | -1.473571 | -1.528467 |
| 32 | 6 | 0 | 2.698721  | -1.496568 | 0.920580  |
| 33 | 6 | 0 | 4.016300  | -1.047071 | 0.971235  |
| 34 | 6 | 0 | 4.152530  | -1.027340 | -1.420081 |
| 35 | 1 | 0 | 4.479721  | -0.896317 | 1.943855  |
| 36 | 1 | 0 | 4.718066  | -0.843622 | -2.330868 |
| 37 | 6 | 0 | -2.721425 | -1.242305 | -0.223253 |
| 38 | 6 | 0 | -5.159344 | -0.004105 | 0.298660  |
| 39 | 6 | 0 | -3.339327 | -1.454220 | 1.018444  |
| 40 | 6 | 0 | -3.311632 | -0.461308 | -1.224326 |
| 41 | 6 | 0 | -4.530411 | 0.153328  | -0.933517 |
| 42 | 6 | 0 | -4.554894 | -0.821616 | 1.254385  |
| 43 | 1 | 0 | -5.000216 | 0.769022  | -1.697246 |
| 44 | 1 | 0 | -5.033309 | -0.954465 | 2.222028  |
| 45 | 6 | 0 | -2.719918 | -2.331735 | 2.061846  |
| 46 | 1 | 0 | -3.065125 | -2.051002 | 3.057897  |
| 47 | 1 | 0 | -1.630377 | -2.252224 | 2.065808  |
| 48 | 1 | 0 | -2.988386 | -3.384492 | 1.907958  |
| 49 | 6 | 0 | -2.667676 | -0.284093 | -2.564105 |
| 50 | 1 | 0 | -3.385171 | 0.104707  | -3.288758 |
| 51 | 1 | 0 | -2.271170 | -1.226218 | -2.954255 |
| 52 | 1 | 0 | -1.818170 | 0.406736  | -2.530185 |
| 53 | 6 | 0 | 1.935171  | -1.784186 | 2.175640  |
| 54 | 1 | 0 | 1.448562  | -2.764160 | 2.135817  |
| 55 | 1 | 0 | 1.140858  | -1.051459 | 2.357742  |
| 56 | 1 | 0 | 2.598448  | -1.777368 | 3.042171  |
| 57 | 6 | 0 | 2.233103  | -1.742618 | -2.871677 |
| 58 | 1 | 0 | 1.155667  | -1.568365 | -2.876368 |
| 59 | 1 | 0 | 2.419589  | -2.777472 | -3.184913 |
| 60 | 1 | 0 | 2.667309  | -1.090069 | -3.630595 |
| 61 | 6 | 0 | -6.452631 | 0.688740  | 0.601854  |
| 62 | 1 | 0 | -7.209070 | -0.012475 | 0.965449  |
| 63 | 1 | 0 | -6.857201 | 1.193242  | -0.277452 |
| 64 | 1 | 0 | -6.321660 | 1.442854  | 1.384219  |
| 65 | 6 | 0 | 6.141209  | -0.236842 | -0.099919 |
| 66 | 1 | 0 | 6.657548  | -0.572838 | 0.802120  |
| 67 | 1 | 0 | 6.121418  | 0.858660  | -0.068499 |
| 68 | 1 | 0 | 6.745455  | -0.519889 | -0.964261 |

Five CD            Free Energy = -2175.149707

|   |    |   |           |          |          |
|---|----|---|-----------|----------|----------|
| 1 | 44 | 0 | 0.148615  | 0.711667 | 0.255523 |
| 2 | 17 | 0 | -0.449634 | 0.290168 | 2.573759 |

|    |    |   |           |           |           |
|----|----|---|-----------|-----------|-----------|
| 3  | 17 | 0 | 0.731699  | 1.153416  | -2.065504 |
| 4  | 6  | 0 | -1.247738 | 1.887007  | 0.145282  |
| 5  | 1  | 0 | -1.399093 | 2.498713  | -0.754714 |
| 6  | 1  | 0 | -1.987145 | 1.990610  | 0.950598  |
| 7  | 6  | 0 | 1.659144  | 2.091891  | 0.987264  |
| 8  | 1  | 0 | 1.994687  | 1.458359  | 1.808977  |
| 9  | 6  | 0 | 0.506551  | 2.893014  | 1.143923  |
| 10 | 1  | 0 | -0.073124 | 2.853518  | 2.060503  |
| 11 | 6  | 0 | 2.641409  | 2.758600  | 0.056351  |
| 12 | 1  | 0 | 3.073348  | 2.074296  | -0.679199 |
| 13 | 1  | 0 | 3.473055  | 3.139567  | 0.667312  |
| 14 | 6  | 0 | 0.666724  | 4.164962  | 0.347466  |
| 15 | 1  | 0 | -0.236327 | 4.500437  | -0.167748 |
| 16 | 1  | 0 | 0.907306  | 4.948942  | 1.079558  |
| 17 | 6  | 0 | 1.847741  | 3.900858  | -0.594355 |
| 18 | 1  | 0 | 1.479138  | 3.571781  | -1.566112 |
| 19 | 1  | 0 | 2.454725  | 4.795100  | -0.754125 |
| 20 | 6  | 0 | -0.321122 | -1.184994 | -0.277898 |
| 21 | 7  | 0 | -1.501117 | -1.816088 | -0.386354 |
| 22 | 7  | 0 | 0.663970  | -2.058945 | -0.563463 |
| 23 | 6  | 0 | -1.333960 | -3.180356 | -0.915756 |
| 24 | 1  | 0 | -1.963066 | -3.886982 | -0.369456 |
| 25 | 1  | 0 | -1.632240 | -3.208811 | -1.971858 |
| 26 | 6  | 0 | 0.159447  | -3.425307 | -0.727155 |
| 27 | 1  | 0 | 0.377213  | -4.017905 | 0.172156  |
| 28 | 1  | 0 | 0.628415  | -3.917408 | -1.582817 |
| 29 | 6  | 0 | 2.037779  | -1.690949 | -0.408789 |
| 30 | 6  | 0 | 4.638124  | -0.722144 | -0.128038 |
| 31 | 6  | 0 | 2.797197  | -1.427742 | -1.561771 |
| 32 | 6  | 0 | 2.581403  | -1.562615 | 0.879251  |
| 33 | 6  | 0 | 3.879219  | -1.053121 | 0.988827  |
| 34 | 6  | 0 | 4.088933  | -0.942912 | -1.393554 |
| 35 | 1  | 0 | 4.307370  | -0.930625 | 1.981480  |
| 36 | 1  | 0 | 4.678085  | -0.709562 | -2.277430 |
| 37 | 6  | 0 | -2.785376 | -1.208821 | -0.219312 |
| 38 | 6  | 0 | -5.272413 | -0.012261 | 0.147964  |
| 39 | 6  | 0 | -3.472490 | -1.427604 | 0.981641  |
| 40 | 6  | 0 | -3.324354 | -0.436751 | -1.255380 |
| 41 | 6  | 0 | -4.569452 | 0.156596  | -1.042707 |
| 42 | 6  | 0 | -4.713313 | -0.816082 | 1.141885  |
| 43 | 1  | 0 | -5.002418 | 0.761033  | -1.836851 |
| 44 | 1  | 0 | -5.255465 | -0.969285 | 2.072345  |
| 45 | 6  | 0 | -2.881438 | -2.275502 | 2.063001  |
| 46 | 1  | 0 | -3.579900 | -2.393374 | 2.893041  |
| 47 | 1  | 0 | -1.965943 | -1.817985 | 2.451703  |
| 48 | 1  | 0 | -2.621417 | -3.277186 | 1.704083  |
| 49 | 6  | 0 | -2.590533 | -0.247738 | -2.545339 |
| 50 | 1  | 0 | -3.222677 | 0.247522  | -3.284505 |
| 51 | 1  | 0 | -2.265852 | -1.201936 | -2.973510 |
| 52 | 1  | 0 | -1.682400 | 0.352344  | -2.420032 |
| 53 | 6  | 0 | 1.875329  | -2.049334 | 2.108808  |
| 54 | 1  | 0 | 2.291310  | -3.018563 | 2.408853  |
| 55 | 1  | 0 | 0.800367  | -2.166031 | 1.975261  |
| 56 | 1  | 0 | 2.009447  | -1.363395 | 2.947496  |
| 57 | 6  | 0 | 2.249788  | -1.681166 | -2.930757 |
| 58 | 1  | 0 | 1.171206  | -1.524296 | -2.970719 |
| 59 | 1  | 0 | 2.460577  | -2.710523 | -3.246896 |
| 60 | 1  | 0 | 2.706034  | -1.013743 | -3.663013 |



|    |   |   |           |           |           |
|----|---|---|-----------|-----------|-----------|
| 61 | 6 | 0 | -6.594322 | 0.659902  | 0.363860  |
| 62 | 1 | 0 | -6.488518 | 1.539799  | 1.007222  |
| 63 | 1 | 0 | -7.310130 | -0.004723 | 0.854212  |
| 64 | 1 | 0 | -7.034716 | 0.996931  | -0.576568 |
| 65 | 6 | 0 | 6.005684  | -0.128352 | 0.016978  |
| 66 | 1 | 0 | 6.420933  | -0.306705 | 1.010685  |
| 67 | 1 | 0 | 5.979182  | 0.956405  | -0.134564 |
| 68 | 1 | 0 | 6.702929  | -0.532690 | -0.720754 |

Five D            Free Energy = -2175.160640

|    |   |   |           |           |           |
|----|---|---|-----------|-----------|-----------|
| 1  | 6 | 0 | 0.251339  | -1.161104 | -0.004634 |
| 2  | 7 | 0 | -0.834482 | -1.971868 | 0.014380  |
| 3  | 7 | 0 | 1.346804  | -1.922396 | 0.204760  |
| 4  | 6 | 0 | -0.503529 | -3.332828 | 0.437224  |
| 5  | 1 | 0 | -0.792728 | -3.488704 | 1.485840  |
| 6  | 1 | 0 | -1.027024 | -4.073119 | -0.173286 |
| 7  | 6 | 0 | 1.007616  | -3.353931 | 0.244397  |
| 8  | 1 | 0 | 1.540598  | -3.854092 | 1.056553  |
| 9  | 1 | 0 | 1.301264  | -3.835584 | -0.698029 |
| 10 | 6 | 0 | 2.700794  | -1.495976 | 0.057973  |
| 11 | 6 | 0 | 5.356179  | -0.700740 | -0.216157 |
| 12 | 6 | 0 | 3.236835  | -1.348769 | -1.228917 |
| 13 | 6 | 0 | 3.463746  | -1.267671 | 1.211586  |
| 14 | 6 | 0 | 4.788100  | -0.869209 | 1.047412  |
| 15 | 6 | 0 | 4.567087  | -0.945331 | -1.338397 |
| 16 | 1 | 0 | 5.390378  | -0.676759 | 1.932423  |
| 17 | 1 | 0 | 4.994745  | -0.816425 | -2.329932 |
| 18 | 6 | 0 | -2.156663 | -1.435563 | -0.098451 |
| 19 | 6 | 0 | -4.634850 | -0.201662 | -0.424863 |
| 20 | 6 | 0 | -2.811789 | -0.918588 | 1.029999  |
| 21 | 6 | 0 | -2.759570 | -1.436006 | -1.369676 |
| 22 | 6 | 0 | -3.989016 | -0.803300 | -1.508659 |
| 23 | 6 | 0 | -4.048292 | -0.296399 | 0.832590  |
| 24 | 1 | 0 | -4.451951 | -0.769959 | -2.492087 |
| 25 | 1 | 0 | -4.560288 | 0.129162  | 1.693354  |
| 26 | 6 | 0 | -2.270691 | -1.087413 | 2.415693  |
| 27 | 1 | 0 | -2.782062 | -1.918522 | 2.915928  |
| 28 | 1 | 0 | -2.431855 | -0.191843 | 3.019684  |
| 29 | 1 | 0 | -1.198401 | -1.280529 | 2.431381  |
| 30 | 6 | 0 | -2.096903 | -2.110896 | -2.527922 |
| 31 | 1 | 0 | -1.101447 | -1.699184 | -2.708236 |
| 32 | 1 | 0 | -2.679982 | -1.979652 | -3.440578 |
| 33 | 1 | 0 | -1.990072 | -3.186994 | -2.350614 |
| 34 | 6 | 0 | 2.853583  | -1.408100 | 2.569498  |
| 35 | 1 | 0 | 2.421292  | -2.402409 | 2.723265  |
| 36 | 1 | 0 | 2.040646  | -0.686045 | 2.706564  |
| 37 | 1 | 0 | 3.595808  | -1.243757 | 3.352148  |
| 38 | 6 | 0 | 2.393888  | -1.576063 | -2.443353 |
| 39 | 1 | 0 | 1.587391  | -0.836269 | -2.516372 |
| 40 | 1 | 0 | 1.912757  | -2.559922 | -2.432086 |
| 41 | 1 | 0 | 2.991481  | -1.510285 | -3.353847 |
| 42 | 6 | 0 | -5.917409 | 0.546343  | -0.619924 |
| 43 | 1 | 0 | -5.721443 | 1.568775  | -0.962837 |
| 44 | 1 | 0 | -6.489175 | 0.621585  | 0.307286  |
| 45 | 1 | 0 | -6.551282 | 0.076179  | -1.375336 |
| 46 | 6 | 0 | 6.790771  | -0.292915 | -0.359676 |
| 47 | 1 | 0 | 7.078736  | 0.441226  | 0.396592  |

|    |    |   |           |           |           |
|----|----|---|-----------|-----------|-----------|
| 48 | 1  | 0 | 6.992150  | 0.136439  | -1.342994 |
| 49 | 1  | 0 | 7.459402  | -1.152078 | -0.238532 |
| 50 | 44 | 0 | -0.059774 | 0.775872  | -0.163136 |
| 51 | 17 | 0 | 0.190013  | 1.111150  | 2.218188  |
| 52 | 17 | 0 | -0.393176 | 0.824515  | -2.557925 |
| 53 | 6  | 0 | 1.672287  | 1.249598  | -0.361379 |
| 54 | 1  | 0 | 2.128540  | 1.350602  | -1.357559 |
| 55 | 1  | 0 | 2.314213  | 1.497384  | 0.496861  |
| 56 | 6  | 0 | -0.757378 | 3.301382  | -0.384839 |
| 57 | 1  | 0 | -0.234315 | 3.325779  | -1.335667 |
| 58 | 6  | 0 | -1.861158 | 2.553379  | -0.150393 |
| 59 | 1  | 0 | -2.338289 | 1.925154  | -0.902384 |
| 60 | 6  | 0 | -0.425061 | 4.184152  | 0.779027  |
| 61 | 1  | 0 | -0.345605 | 5.227684  | 0.452230  |
| 62 | 6  | 0 | -2.470545 | 2.850913  | 1.186089  |
| 63 | 1  | 0 | -3.513914 | 3.166740  | 1.054604  |
| 64 | 6  | 0 | -1.576917 | 3.957221  | 1.783245  |
| 65 | 1  | 0 | -2.146985 | 4.878215  | 1.932175  |
| 66 | 1  | 0 | -1.187984 | 3.655545  | 2.756296  |
| 67 | 1  | 0 | 0.548258  | 3.920967  | 1.207985  |
| 68 | 1  | 0 | -2.500170 | 1.960292  | 1.822463  |

## Z-Cyclohexene formation

Six A Free Energy = -2214.446270

|    |    |   |           |           |           |
|----|----|---|-----------|-----------|-----------|
| 1  | 44 | 0 | 1.447375  | 1.978688  | -0.238018 |
| 2  | 17 | 0 | 0.932421  | 0.574984  | 1.560570  |
| 3  | 17 | 0 | 2.261567  | 2.204467  | -2.409467 |
| 4  | 6  | 0 | -1.260388 | 2.094739  | -0.854193 |
| 5  | 1  | 0 | -1.657438 | 2.549660  | -1.774717 |
| 6  | 1  | 0 | -0.955410 | 1.073249  | -1.130093 |
| 7  | 6  | 0 | -4.638496 | 1.127001  | 0.860150  |
| 8  | 1  | 0 | -4.196192 | 0.740105  | 1.789181  |
| 9  | 1  | 0 | -4.994354 | 2.139244  | 1.089171  |
| 10 | 6  | 0 | -2.352213 | 2.028559  | 0.219296  |
| 11 | 1  | 0 | -1.915557 | 1.620387  | 1.139756  |
| 12 | 1  | 0 | -2.677927 | 3.049641  | 0.461166  |
| 13 | 6  | 0 | -3.545887 | 1.188335  | -0.205562 |
| 14 | 1  | 0 | -3.969815 | 1.583789  | -1.137887 |
| 15 | 1  | 0 | -3.207864 | 0.170218  | -0.439989 |
| 16 | 6  | 0 | 2.666503  | 3.143804  | 0.691082  |
| 17 | 7  | 0 | 2.570179  | 4.451845  | 1.047500  |
| 18 | 7  | 0 | 3.892341  | 2.705488  | 1.102608  |
| 19 | 6  | 0 | 3.725614  | 4.907335  | 1.827155  |
| 20 | 1  | 0 | 4.078211  | 5.876196  | 1.461562  |
| 21 | 1  | 0 | 3.446564  | 5.033265  | 2.881888  |
| 22 | 6  | 0 | 4.731687  | 3.783112  | 1.622677  |
| 23 | 1  | 0 | 5.508449  | 4.046249  | 0.892229  |
| 24 | 1  | 0 | 5.229979  | 3.475391  | 2.546871  |
| 25 | 6  | 0 | 4.435975  | 1.430587  | 0.750680  |
| 26 | 6  | 0 | 5.403116  | -1.084992 | 0.034524  |
| 27 | 6  | 0 | 4.361829  | 0.380999  | 1.679306  |
| 28 | 6  | 0 | 5.073772  | 1.270849  | -0.491229 |
| 29 | 6  | 0 | 5.529945  | -0.000258 | -0.831428 |
| 30 | 6  | 0 | 4.840577  | -0.868199 | 1.290596  |
| 31 | 1  | 0 | 6.002333  | -0.142917 | -1.800567 |
| 32 | 1  | 0 | 4.765897  | -1.696462 | 1.991413  |
| 33 | 6  | 0 | 1.384615  | 5.241069  | 1.019028  |
| 34 | 6  | 0 | -0.935852 | 6.778698  | 0.933062  |
| 35 | 6  | 0 | 1.178554  | 6.097085  | -0.067948 |
| 36 | 6  | 0 | 0.449327  | 5.114812  | 2.053509  |
| 37 | 6  | 0 | -0.702044 | 5.898188  | 1.989606  |
| 38 | 6  | 0 | 0.011220  | 6.858747  | -0.088933 |
| 39 | 1  | 0 | -1.444051 | 5.805132  | 2.779604  |
| 40 | 1  | 0 | -0.169353 | 7.520344  | -0.933280 |
| 41 | 6  | 0 | 2.148663  | 6.113182  | -1.207631 |
| 42 | 1  | 0 | 3.171876  | 6.314798  | -0.875153 |
| 43 | 1  | 0 | 1.879516  | 6.868650  | -1.947355 |
| 44 | 1  | 0 | 2.172397  | 5.137912  | -1.708726 |
| 45 | 6  | 0 | 0.633458  | 4.099005  | 3.137529  |
| 46 | 1  | 0 | 0.561556  | 3.080731  | 2.735589  |
| 47 | 1  | 0 | -0.126081 | 4.208310  | 3.913127  |
| 48 | 1  | 0 | 1.613739  | 4.170982  | 3.618585  |
| 49 | 6  | 0 | 5.347560  | 2.430421  | -1.400007 |
| 50 | 1  | 0 | 6.349153  | 2.832771  | -1.203184 |
| 51 | 1  | 0 | 4.626492  | 3.240992  | -1.286288 |
| 52 | 1  | 0 | 5.318403  | 2.124349  | -2.446453 |
| 53 | 6  | 0 | 3.844556  | 0.588283  | 3.069619  |
| 54 | 1  | 0 | 3.164975  | 1.437833  | 3.137322  |

|    |   |   |           |           |           |
|----|---|---|-----------|-----------|-----------|
| 55 | 1 | 0 | 4.678154  | 0.760162  | 3.761764  |
| 56 | 1 | 0 | 3.303677  | -0.291477 | 3.422374  |
| 57 | 6 | 0 | -2.167621 | 7.631308  | 0.902437  |
| 58 | 1 | 0 | -2.494371 | 7.832654  | -0.120148 |
| 59 | 1 | 0 | -1.985733 | 8.602140  | 1.376006  |
| 60 | 1 | 0 | -2.996357 | 7.164415  | 1.438682  |
| 61 | 6 | 0 | 5.851343  | -2.452721 | -0.379611 |
| 62 | 1 | 0 | 5.064569  | -2.967215 | -0.941299 |
| 63 | 1 | 0 | 6.091411  | -3.077880 | 0.482804  |
| 64 | 1 | 0 | 6.729962  | -2.412431 | -1.027418 |
| 65 | 6 | 0 | -7.048832 | 0.676633  | 0.336864  |
| 66 | 1 | 0 | -7.844692 | 0.005914  | 0.031880  |
| 67 | 1 | 0 | -7.332057 | 1.705991  | 0.542292  |
| 68 | 6 | 0 | -5.790590 | 0.266967  | 0.459666  |
| 69 | 1 | 0 | -5.550124 | -0.774156 | 0.238777  |
| 70 | 6 | 0 | -0.099001 | 2.894920  | -0.370013 |
| 71 | 1 | 0 | -0.295997 | 3.943212  | -0.126119 |

Six B Free Energy = -2214.456777

|    |    |   |           |           |           |
|----|----|---|-----------|-----------|-----------|
| 1  | 44 | 0 | -0.238614 | -0.791504 | -0.114933 |
| 2  | 17 | 0 | 0.054953  | -1.451097 | 2.203568  |
| 3  | 17 | 0 | -0.508643 | -0.472410 | -2.509704 |
| 4  | 6  | 0 | -3.079571 | 0.252244  | -0.459654 |
| 5  | 1  | 0 | -3.357011 | 1.292785  | -0.236058 |
| 6  | 1  | 0 | -2.932478 | 0.172501  | -1.539589 |
| 7  | 6  | 0 | -2.945786 | -2.607167 | -1.193269 |
| 8  | 1  | 0 | -3.146842 | -3.605700 | -1.604397 |
| 9  | 1  | 0 | -2.555294 | -2.028677 | -2.039533 |
| 10 | 6  | 0 | -4.193876 | -0.687802 | 0.042457  |
| 11 | 1  | 0 | -4.043654 | -0.857178 | 1.116791  |
| 12 | 1  | 0 | -5.161774 | -0.183890 | -0.037665 |
| 13 | 6  | 0 | -4.269319 | -2.026650 | -0.696760 |
| 14 | 1  | 0 | -4.773757 | -2.756539 | -0.052272 |
| 15 | 1  | 0 | -4.915892 | -1.913023 | -1.573929 |
| 16 | 6  | 0 | 0.940549  | 0.815623  | -0.039360 |
| 17 | 7  | 0 | 0.686770  | 2.143036  | -0.061018 |
| 18 | 7  | 0 | 2.280486  | 0.649957  | -0.119017 |
| 19 | 6  | 0 | 1.923763  | 2.936121  | 0.000742  |
| 20 | 1  | 0 | 1.880454  | 3.775638  | -0.697730 |
| 21 | 1  | 0 | 2.058413  | 3.345769  | 1.011480  |
| 22 | 6  | 0 | 2.990441  | 1.908523  | -0.354499 |
| 23 | 1  | 0 | 3.305140  | 1.975968  | -1.404894 |
| 24 | 1  | 0 | 3.883991  | 1.977367  | 0.271330  |
| 25 | 6  | 0 | 2.899136  | -0.639949 | -0.111972 |
| 26 | 6  | 0 | 3.983242  | -3.205477 | 0.001542  |
| 27 | 6  | 0 | 3.346986  | -1.141388 | 1.124398  |
| 28 | 6  | 0 | 3.062843  | -1.359859 | -1.303288 |
| 29 | 6  | 0 | 3.591282  | -2.652073 | -1.211705 |
| 30 | 6  | 0 | 3.875658  | -2.424069 | 1.156345  |
| 31 | 1  | 0 | 3.709671  | -3.231130 | -2.125191 |
| 32 | 1  | 0 | 4.205369  | -2.831257 | 2.109231  |
| 33 | 6  | 0 | -0.580385 | 2.752360  | 0.182905  |
| 34 | 6  | 0 | -3.035311 | 3.985008  | 0.659238  |
| 35 | 6  | 0 | -1.283401 | 3.305124  | -0.894458 |
| 36 | 6  | 0 | -1.069010 | 2.812741  | 1.496840  |
| 37 | 6  | 0 | -2.304327 | 3.422123  | 1.706780  |
| 38 | 6  | 0 | -2.507124 | 3.919869  | -0.629409 |

|    |   |   |           |           |           |
|----|---|---|-----------|-----------|-----------|
| 39 | 1 | 0 | -2.701007 | 3.465688  | 2.718846  |
| 40 | 1 | 0 | -3.067448 | 4.348796  | -1.457246 |
| 41 | 6 | 0 | -0.754420 | 3.197588  | -2.288780 |
| 42 | 1 | 0 | 0.255470  | 3.611257  | -2.377890 |
| 43 | 1 | 0 | -1.394865 | 3.729921  | -2.994077 |
| 44 | 1 | 0 | -0.690617 | 2.148471  | -2.599218 |
| 45 | 6 | 0 | -0.297094 | 2.214521  | 2.630676  |
| 46 | 1 | 0 | -0.208660 | 1.125298  | 2.535360  |
| 47 | 1 | 0 | -0.776433 | 2.428000  | 3.587453  |
| 48 | 1 | 0 | 0.725079  | 2.605100  | 2.677195  |
| 49 | 6 | 0 | 2.785738  | -0.765880 | -2.649774 |
| 50 | 1 | 0 | 3.732179  | -0.542177 | -3.156021 |
| 51 | 1 | 0 | 2.196263  | 0.148409  | -2.599177 |
| 52 | 1 | 0 | 2.229617  | -1.457257 | -3.286120 |
| 53 | 6 | 0 | 3.264731  | -0.302897 | 2.360635  |
| 54 | 1 | 0 | 2.231765  | -0.018272 | 2.574064  |
| 55 | 1 | 0 | 3.852829  | 0.616745  | 2.260524  |
| 56 | 1 | 0 | 3.643905  | -0.847186 | 3.226862  |
| 57 | 6 | 0 | -4.344080 | 4.665487  | 0.922811  |
| 58 | 1 | 0 | -4.932217 | 4.779677  | 0.010149  |
| 59 | 1 | 0 | -4.191218 | 5.667571  | 1.337438  |
| 60 | 1 | 0 | -4.947155 | 4.113675  | 1.648276  |
| 61 | 6 | 0 | 4.511978  | -4.604699 | 0.079583  |
| 62 | 1 | 0 | 3.787890  | -5.272024 | 0.558329  |
| 63 | 1 | 0 | 5.427360  | -4.656844 | 0.675136  |
| 64 | 1 | 0 | 4.728303  | -5.011600 | -0.909880 |
| 65 | 6 | 0 | -0.556385 | -3.030571 | -0.542353 |
| 66 | 1 | 0 | 0.152865  | -3.377491 | 0.205426  |
| 67 | 1 | 0 | -0.292463 | -3.137889 | -1.592430 |
| 68 | 6 | 0 | -1.847717 | -2.756561 | -0.186233 |
| 69 | 1 | 0 | -2.106052 | -2.797794 | 0.872720  |
| 70 | 6 | 0 | -1.841620 | -0.026188 | 0.316721  |
| 71 | 1 | 0 | -1.983144 | 0.174962  | 1.396508  |

Six BC Free Energy = -2214.452847

|    |    |   |           |           |           |
|----|----|---|-----------|-----------|-----------|
| 1  | 44 | 0 | 0.280895  | 0.753633  | -0.167607 |
| 2  | 17 | 0 | 0.731713  | 0.585086  | -2.551172 |
| 3  | 17 | 0 | 0.059209  | 1.103075  | 2.227699  |
| 4  | 6  | 0 | -2.584719 | 1.712649  | 0.258880  |
| 5  | 1  | 0 | -3.321570 | 0.903496  | 0.147157  |
| 6  | 1  | 0 | -2.319882 | 1.756613  | 1.317707  |
| 7  | 6  | 0 | -0.831531 | 3.907662  | 0.380166  |
| 8  | 1  | 0 | -0.276468 | 4.849449  | 0.475470  |
| 9  | 1  | 0 | -0.779937 | 3.441896  | 1.370546  |
| 10 | 6  | 0 | -3.183736 | 3.025430  | -0.251574 |
| 11 | 1  | 0 | -3.383278 | 2.914043  | -1.324406 |
| 12 | 1  | 0 | -4.159788 | 3.185752  | 0.216131  |
| 13 | 6  | 0 | -2.272391 | 4.239927  | -0.004866 |
| 14 | 1  | 0 | -2.267788 | 4.882628  | -0.892679 |
| 15 | 1  | 0 | -2.688826 | 4.856634  | 0.798028  |
| 16 | 6  | 0 | 0.386178  | -1.258392 | 0.103283  |
| 17 | 7  | 0 | -0.585506 | -2.171608 | 0.283212  |
| 18 | 7  | 0 | 1.575788  | -1.887187 | 0.143156  |
| 19 | 6  | 0 | -0.046304 | -3.540879 | 0.319056  |
| 20 | 1  | 0 | -0.495911 | -4.110699 | 1.136380  |
| 21 | 1  | 0 | -0.279063 | -4.060727 | -0.619557 |
| 22 | 6  | 0 | 1.451103  | -3.304779 | 0.496543  |

|    |   |   |           |           |           |
|----|---|---|-----------|-----------|-----------|
| 23 | 1 | 0 | 1.784311  | -3.467753 | 1.530345  |
| 24 | 1 | 0 | 2.066947  | -3.925123 | -0.160286 |
| 25 | 6 | 0 | 2.801705  | -1.148340 | 0.123759  |
| 26 | 6 | 0 | 5.067836  | 0.470978  | 0.027389  |
| 27 | 6 | 0 | 3.485754  | -1.005047 | -1.095236 |
| 28 | 6 | 0 | 3.276007  | -0.569141 | 1.311935  |
| 29 | 6 | 0 | 4.403480  | 0.249408  | 1.230779  |
| 30 | 6 | 0 | 4.608463  | -0.182828 | -1.116636 |
| 31 | 1 | 0 | 4.771781  | 0.720368  | 2.139487  |
| 32 | 1 | 0 | 5.134084  | -0.042488 | -2.058624 |
| 33 | 6 | 0 | -1.989861 | -1.919476 | 0.198406  |
| 34 | 6 | 0 | -4.733065 | -1.451194 | 0.050182  |
| 35 | 6 | 0 | -2.719940 | -1.780153 | 1.385491  |
| 36 | 6 | 0 | -2.599812 | -1.849562 | -1.061768 |
| 37 | 6 | 0 | -3.971877 | -1.607612 | -1.108603 |
| 38 | 6 | 0 | -4.091976 | -1.549551 | 1.284496  |
| 39 | 1 | 0 | -4.458370 | -1.546532 | -2.079731 |
| 40 | 1 | 0 | -4.672271 | -1.436694 | 2.197629  |
| 41 | 6 | 0 | -2.038615 | -1.843219 | 2.715335  |
| 42 | 1 | 0 | -1.416065 | -2.738320 | 2.815797  |
| 43 | 1 | 0 | -2.765044 | -1.847428 | 3.529708  |
| 44 | 1 | 0 | -1.374999 | -0.980927 | 2.849534  |
| 45 | 6 | 0 | -1.802663 | -2.014378 | -2.316489 |
| 46 | 1 | 0 | -1.077238 | -1.203216 | -2.449161 |
| 47 | 1 | 0 | -2.452478 | -2.029472 | -3.192911 |
| 48 | 1 | 0 | -1.228595 | -2.946871 | -2.315007 |
| 49 | 6 | 0 | 2.672097  | -0.879201 | 2.647225  |
| 50 | 1 | 0 | 3.251759  | -1.668969 | 3.140871  |
| 51 | 1 | 0 | 1.634165  | -1.206536 | 2.581353  |
| 52 | 1 | 0 | 2.682673  | -0.005270 | 3.299923  |
| 53 | 6 | 0 | 3.068422  | -1.746539 | -2.326738 |
| 54 | 1 | 0 | 2.015762  | -2.027736 | -2.302171 |
| 55 | 1 | 0 | 3.666453  | -2.659688 | -2.437654 |
| 56 | 1 | 0 | 3.220490  | -1.139748 | -3.220403 |
| 57 | 6 | 0 | -6.197939 | -1.147492 | -0.032440 |
| 58 | 1 | 0 | -6.660938 | -1.617679 | -0.902948 |
| 59 | 1 | 0 | -6.369945 | -0.068938 | -0.124575 |
| 60 | 1 | 0 | -6.732402 | -1.481257 | 0.859378  |
| 61 | 6 | 0 | 6.245933  | 1.393635  | -0.044997 |
| 62 | 1 | 0 | 5.965610  | 2.353437  | -0.491769 |
| 63 | 1 | 0 | 7.045288  | 0.979793  | -0.665077 |
| 64 | 1 | 0 | 6.657398  | 1.603506  | 0.944054  |
| 65 | 6 | 0 | 1.258152  | 2.634239  | -0.287097 |
| 66 | 1 | 0 | 1.967958  | 2.528986  | -1.103534 |
| 67 | 1 | 0 | 1.652584  | 2.870130  | 0.700452  |
| 68 | 6 | 0 | -0.061977 | 3.047206  | -0.588642 |
| 69 | 1 | 0 | -0.286207 | 3.154887  | -1.651335 |
| 70 | 6 | 0 | -1.430286 | 1.318823  | -0.592714 |
| 71 | 1 | 0 | -1.668515 | 1.317953  | -1.672437 |

Six C Free Energy = -2214.462541

|   |    |   |           |          |           |
|---|----|---|-----------|----------|-----------|
| 1 | 44 | 0 | 0.045934  | 0.672910 | -0.092661 |
| 2 | 17 | 0 | 0.810124  | 0.446981 | -2.388788 |
| 3 | 17 | 0 | -0.612906 | 0.997309 | 2.210462  |
| 4 | 6  | 0 | 1.104751  | 2.316188 | -0.028251 |
| 5 | 1  | 0 | 1.929370  | 2.372360 | -0.738749 |
| 6 | 1  | 0 | 1.321651  | 2.679006 | 0.979204  |

|    |   |   |           |           |           |
|----|---|---|-----------|-----------|-----------|
| 7  | 6 | 0 | -1.420502 | 1.743474  | -0.820207 |
| 8  | 1 | 0 | -1.532570 | 1.574831  | -1.897809 |
| 9  | 6 | 0 | -0.250427 | 2.839794  | -0.591279 |
| 10 | 1 | 0 | -0.019589 | 3.135520  | -1.620169 |
| 11 | 6 | 0 | -2.719449 | 2.079573  | -0.140028 |
| 12 | 1 | 0 | -3.462666 | 1.324775  | -0.415890 |
| 13 | 1 | 0 | -2.619805 | 2.047650  | 0.946592  |
| 14 | 6 | 0 | -0.818823 | 3.968250  | 0.268652  |
| 15 | 1 | 0 | -0.979590 | 3.579841  | 1.280150  |
| 16 | 1 | 0 | -0.064605 | 4.756219  | 0.357838  |
| 17 | 6 | 0 | -3.171274 | 3.467374  | -0.608093 |
| 18 | 1 | 0 | -3.376752 | 3.427771  | -1.684176 |
| 19 | 6 | 0 | -2.108089 | 4.543170  | -0.313112 |
| 20 | 1 | 0 | -1.868494 | 5.093619  | -1.230183 |
| 21 | 6 | 0 | 0.403582  | -1.300527 | 0.152384  |
| 22 | 7 | 0 | 1.611404  | -1.885456 | 0.150018  |
| 23 | 7 | 0 | -0.545384 | -2.249004 | 0.202240  |
| 24 | 6 | 0 | 1.506611  | -3.340696 | 0.337740  |
| 25 | 1 | 0 | 2.175414  | -3.866346 | -0.347397 |
| 26 | 1 | 0 | 1.791817  | -3.605564 | 1.365041  |
| 27 | 6 | 0 | 0.030908  | -3.593787 | 0.053570  |
| 28 | 1 | 0 | -0.140734 | -3.962448 | -0.966154 |
| 29 | 1 | 0 | -0.434198 | -4.293492 | 0.751674  |
| 30 | 6 | 0 | -1.949651 | -1.980630 | 0.277712  |
| 31 | 6 | 0 | -4.660277 | -1.384087 | 0.492212  |
| 32 | 6 | 0 | -2.546808 | -1.975955 | 1.545734  |
| 33 | 6 | 0 | -2.683672 | -1.740564 | -0.892012 |
| 34 | 6 | 0 | -4.038745 | -1.440815 | -0.754203 |
| 35 | 6 | 0 | -3.902273 | -1.669158 | 1.626880  |
| 36 | 1 | 0 | -4.621408 | -1.239068 | -1.650657 |
| 37 | 1 | 0 | -4.374685 | -1.641162 | 2.605997  |
| 38 | 6 | 0 | 2.849108  | -1.170016 | 0.128916  |
| 39 | 6 | 0 | 5.195392  | 0.332056  | 0.027184  |
| 40 | 6 | 0 | 3.606456  | -1.166188 | -1.054361 |
| 41 | 6 | 0 | 3.272333  | -0.491466 | 1.279457  |
| 42 | 6 | 0 | 4.445542  | 0.261162  | 1.196410  |
| 43 | 6 | 0 | 4.767460  | -0.402209 | -1.080840 |
| 44 | 1 | 0 | 4.782122  | 0.799915  | 2.079487  |
| 45 | 1 | 0 | 5.350472  | -0.370751 | -1.998569 |
| 46 | 6 | 0 | 3.199223  | -1.970699 | -2.249530 |
| 47 | 1 | 0 | 2.114638  | -2.058678 | -2.331637 |
| 48 | 1 | 0 | 3.626705  | -2.980469 | -2.206883 |
| 49 | 1 | 0 | 3.557532  | -1.507210 | -3.169994 |
| 50 | 6 | 0 | 2.521468  | -0.557494 | 2.573066  |
| 51 | 1 | 0 | 1.907095  | -1.457150 | 2.654592  |
| 52 | 1 | 0 | 1.835482  | 0.287147  | 2.693452  |
| 53 | 1 | 0 | 3.215069  | -0.541513 | 3.417000  |
| 54 | 6 | 0 | -2.049044 | -1.821930 | -2.245924 |
| 55 | 1 | 0 | -2.701123 | -1.389627 | -3.007194 |
| 56 | 1 | 0 | -1.865991 | -2.863644 | -2.534131 |
| 57 | 1 | 0 | -1.090045 | -1.297106 | -2.295971 |
| 58 | 6 | 0 | -1.744148 | -2.274088 | 2.772160  |
| 59 | 1 | 0 | -2.374648 | -2.271087 | 3.662341  |
| 60 | 1 | 0 | -0.963685 | -1.520477 | 2.912277  |
| 61 | 1 | 0 | -1.255475 | -3.252851 | 2.713179  |
| 62 | 6 | 0 | 6.434656  | 1.170428  | -0.048910 |
| 63 | 1 | 0 | 6.293596  | 2.023036  | -0.720884 |
| 64 | 1 | 0 | 7.282912  | 0.600923  | -0.439141 |

|    |   |   |           |           |           |
|----|---|---|-----------|-----------|-----------|
| 65 | 1 | 0 | 6.715784  | 1.565408  | 0.929011  |
| 66 | 6 | 0 | -6.099003 | -0.985029 | 0.610284  |
| 67 | 1 | 0 | -6.557528 | -1.381099 | 1.518702  |
| 68 | 1 | 0 | -6.687016 | -1.324856 | -0.245303 |
| 69 | 1 | 0 | -6.196519 | 0.105871  | 0.651935  |
| 70 | 1 | 0 | -4.123340 | 3.717568  | -0.130188 |
| 71 | 1 | 0 | -2.500424 | 5.289903  | 0.383716  |

Six CD Free Energy = -2214.445284

|    |   |   |           |           |           |
|----|---|---|-----------|-----------|-----------|
| 1  | 6 | 0 | 0.414892  | -1.328147 | 0.340542  |
| 2  | 7 | 0 | -0.564124 | -2.204849 | 0.644999  |
| 3  | 7 | 0 | 1.599251  | -1.950156 | 0.469200  |
| 4  | 6 | 0 | -0.047550 | -3.563553 | 0.836529  |
| 5  | 1 | 0 | -0.520098 | -4.047541 | 1.694666  |
| 6  | 1 | 0 | -0.249237 | -4.172974 | -0.055430 |
| 7  | 6 | 0 | 1.439983  | -3.299083 | 1.036349  |
| 8  | 1 | 0 | 1.724477  | -3.294154 | 2.096803  |
| 9  | 1 | 0 | 2.082936  | -4.014852 | 0.518602  |
| 10 | 6 | 0 | 2.880628  | -1.340654 | 0.293946  |
| 11 | 6 | 0 | 5.363797  | -0.142525 | -0.089745 |
| 12 | 6 | 0 | 3.572921  | -1.582821 | -0.899305 |
| 13 | 6 | 0 | 3.410896  | -0.541831 | 1.313893  |
| 14 | 6 | 0 | 4.654178  | 0.052127  | 1.093364  |
| 15 | 6 | 0 | 4.812663  | -0.971191 | -1.067575 |
| 16 | 1 | 0 | 5.080648  | 0.677510  | 1.874703  |
| 17 | 1 | 0 | 5.359955  | -1.143353 | -1.991719 |
| 18 | 6 | 0 | -1.942542 | -1.865543 | 0.471410  |
| 19 | 6 | 0 | -4.582415 | -1.022546 | 0.158841  |
| 20 | 6 | 0 | -2.709241 | -1.579396 | 1.614741  |
| 21 | 6 | 0 | -2.490910 | -1.810064 | -0.819663 |
| 22 | 6 | 0 | -3.811263 | -1.365988 | -0.945586 |
| 23 | 6 | 0 | -4.021028 | -1.158239 | 1.431392  |
| 24 | 1 | 0 | -4.244544 | -1.298758 | -1.941343 |
| 25 | 1 | 0 | -4.616704 | -0.908018 | 2.306089  |
| 26 | 6 | 0 | -2.135774 | -1.738973 | 2.987316  |
| 27 | 1 | 0 | -2.163641 | -2.789028 | 3.303043  |
| 28 | 1 | 0 | -2.705091 | -1.162652 | 3.717898  |
| 29 | 1 | 0 | -1.099550 | -1.397688 | 3.029814  |
| 30 | 6 | 0 | -1.760238 | -2.299694 | -2.033054 |
| 31 | 1 | 0 | -1.905438 | -1.631764 | -2.884383 |
| 32 | 1 | 0 | -2.145187 | -3.285467 | -2.320097 |
| 33 | 1 | 0 | -0.683614 | -2.381596 | -1.888229 |
| 34 | 6 | 0 | 2.667606  | -0.325634 | 2.594366  |
| 35 | 1 | 0 | 2.349391  | -1.271375 | 3.045587  |
| 36 | 1 | 0 | 1.755414  | 0.263624  | 2.447662  |
| 37 | 1 | 0 | 3.290306  | 0.195036  | 3.324029  |
| 38 | 6 | 0 | 2.983324  | -2.448398 | -1.967303 |
| 39 | 1 | 0 | 2.101388  | -1.966907 | -2.403556 |
| 40 | 1 | 0 | 2.663659  | -3.421151 | -1.578988 |
| 41 | 1 | 0 | 3.703172  | -2.629380 | -2.767129 |
| 42 | 6 | 0 | -5.968596 | -0.480982 | -0.006575 |
| 43 | 1 | 0 | -5.969799 | 0.611061  | 0.086906  |
| 44 | 1 | 0 | -6.648888 | -0.864331 | 0.757718  |
| 45 | 1 | 0 | -6.384893 | -0.723111 | -0.986312 |
| 46 | 6 | 0 | 6.684130  | 0.529649  | -0.315031 |
| 47 | 1 | 0 | 7.123997  | 0.880448  | 0.620581  |
| 48 | 1 | 0 | 6.576101  | 1.400684  | -0.970029 |



|    |    |   |           |           |           |
|----|----|---|-----------|-----------|-----------|
| 49 | 1  | 0 | 7.401205  | -0.139887 | -0.796637 |
| 50 | 44 | 0 | -0.048694 | 0.554483  | -0.227559 |
| 51 | 17 | 0 | -0.627310 | 1.162470  | 2.050202  |
| 52 | 17 | 0 | 0.521874  | 0.091115  | -2.545673 |
| 53 | 6  | 0 | 1.377869  | 1.702221  | -0.191082 |
| 54 | 1  | 0 | 2.081369  | 1.781406  | -1.030131 |
| 55 | 1  | 0 | 1.593674  | 2.313365  | 0.695433  |
| 56 | 6  | 0 | -1.533464 | 1.923001  | -1.042112 |
| 57 | 1  | 0 | -1.663012 | 1.416781  | -1.999125 |
| 58 | 6  | 0 | -0.414155 | 2.783989  | -0.966918 |
| 59 | 1  | 0 | 0.175624  | 2.861621  | -1.878186 |
| 60 | 6  | 0 | -0.449275 | 3.969389  | -0.028251 |
| 61 | 1  | 0 | 0.243774  | 4.736808  | -0.385081 |
| 62 | 1  | 0 | -0.116025 | 3.675818  | 0.973277  |
| 63 | 6  | 0 | -2.799280 | 2.167434  | -0.256061 |
| 64 | 1  | 0 | -3.062025 | 1.281386  | 0.334042  |
| 65 | 1  | 0 | -3.596749 | 2.258256  | -1.008616 |
| 66 | 6  | 0 | -2.781994 | 3.409010  | 0.638756  |
| 67 | 1  | 0 | -3.805716 | 3.778545  | 0.759895  |
| 68 | 1  | 0 | -2.425088 | 3.129874  | 1.634298  |
| 69 | 6  | 0 | -1.877845 | 4.500313  | 0.087074  |
| 70 | 1  | 0 | -2.232378 | 4.836302  | -0.897337 |
| 71 | 1  | 0 | -1.895445 | 5.378040  | 0.740372  |

Six D Free Energy = -2214.453816

|    |    |   |           |           |           |
|----|----|---|-----------|-----------|-----------|
| 1  | 6  | 0 | -2.077736 | 4.598386  | 0.077216  |
| 2  | 6  | 0 | -0.679543 | 4.131234  | -0.322089 |
| 3  | 6  | 0 | -0.758844 | 2.904971  | -1.180482 |
| 4  | 6  | 0 | -1.804512 | 2.044272  | -1.090962 |
| 5  | 6  | 0 | -2.964864 | 2.238578  | -0.165343 |
| 6  | 6  | 0 | -2.848349 | 3.465320  | 0.740067  |
| 7  | 44 | 0 | 0.044071  | 0.573501  | -0.253442 |
| 8  | 6  | 0 | 1.690169  | 1.308185  | -0.144164 |
| 9  | 6  | 0 | 0.529639  | -1.253906 | 0.305006  |
| 10 | 7  | 0 | -0.470120 | -2.118108 | 0.610348  |
| 11 | 6  | 0 | 0.017097  | -3.486504 | 0.787478  |
| 12 | 6  | 0 | 1.505567  | -3.254931 | 1.005895  |
| 13 | 7  | 0 | 1.700783  | -1.910375 | 0.445212  |
| 14 | 6  | 0 | -1.848634 | -1.775696 | 0.450365  |
| 15 | 6  | 0 | -2.598049 | -1.472486 | 1.602530  |
| 16 | 6  | 0 | -3.925392 | -1.095806 | 1.437760  |
| 17 | 6  | 0 | -4.520225 | -1.018619 | 0.174883  |
| 18 | 6  | 0 | -3.764086 | -1.373055 | -0.936147 |
| 19 | 6  | 0 | -2.429934 | -1.781215 | -0.827148 |
| 20 | 6  | 0 | 3.002450  | -1.341871 | 0.317968  |
| 21 | 6  | 0 | 3.703869  | -1.548865 | -0.877119 |
| 22 | 6  | 0 | 4.973403  | -0.988922 | -0.991126 |
| 23 | 6  | 0 | 5.544611  | -0.242031 | 0.040717  |
| 24 | 6  | 0 | 4.821589  | -0.073243 | 1.219580  |
| 25 | 6  | 0 | 3.548166  | -0.618712 | 1.387178  |
| 26 | 6  | 0 | 6.899405  | 0.375988  | -0.127383 |
| 27 | 6  | 0 | 3.084313  | -2.314566 | -2.002453 |
| 28 | 6  | 0 | 2.778943  | -0.429365 | 2.657154  |
| 29 | 6  | 0 | -5.931698 | -0.540318 | 0.030042  |
| 30 | 6  | 0 | -1.993777 | -1.585741 | 2.966533  |
| 31 | 6  | 0 | -1.718599 | -2.303881 | -2.037648 |
| 32 | 17 | 0 | -0.468007 | 1.296021  | 1.988483  |

|    |    |   |           |           |           |
|----|----|---|-----------|-----------|-----------|
| 33 | 17 | 0 | 0.448571  | 0.129291  | -2.604746 |
| 34 | 1  | 0 | -0.474251 | -3.972073 | 1.634172  |
| 35 | 1  | 0 | -0.186035 | -4.081688 | -0.114374 |
| 36 | 1  | 0 | 1.776432  | -3.260933 | 2.070152  |
| 37 | 1  | 0 | 2.138572  | -3.983368 | 0.493150  |
| 38 | 1  | 0 | 5.258414  | 0.496928  | 2.036404  |
| 39 | 1  | 0 | 5.529622  | -1.135302 | -1.914423 |
| 40 | 1  | 0 | -4.222783 | -1.353727 | -1.922723 |
| 41 | 1  | 0 | -4.509767 | -0.839710 | 2.318473  |
| 42 | 1  | 0 | -1.992016 | -2.628864 | 3.305741  |
| 43 | 1  | 0 | -2.562009 | -1.006106 | 3.695423  |
| 44 | 1  | 0 | -0.965027 | -1.221675 | 2.981199  |
| 45 | 1  | 0 | -1.877054 | -1.660152 | -2.905029 |
| 46 | 1  | 0 | -2.108423 | -3.297283 | -2.289795 |
| 47 | 1  | 0 | -0.639869 | -2.381315 | -1.905651 |
| 48 | 1  | 0 | 2.569560  | -1.385887 | 3.148981  |
| 49 | 1  | 0 | 1.810830  | 0.053382  | 2.481122  |
| 50 | 1  | 0 | 3.336496  | 0.185774  | 3.365288  |
| 51 | 1  | 0 | 2.239674  | -1.757803 | -2.423977 |
| 52 | 1  | 0 | 2.694031  | -3.283558 | -1.674268 |
| 53 | 1  | 0 | 3.806714  | -2.496059 | -2.799806 |
| 54 | 1  | 0 | -5.994508 | 0.542310  | 0.186493  |
| 55 | 1  | 0 | -6.592889 | -1.002907 | 0.767380  |
| 56 | 1  | 0 | -6.331337 | -0.750549 | -0.963655 |
| 57 | 1  | 0 | 7.320507  | 0.693879  | 0.828221  |
| 58 | 1  | 0 | 6.851722  | 1.259252  | -0.772749 |
| 59 | 1  | 0 | 7.603718  | -0.317321 | -0.594150 |
| 60 | 1  | 0 | 2.416307  | 1.241907  | -0.966836 |
| 61 | 1  | 0 | 1.995185  | 1.899612  | 0.733245  |
| 62 | 1  | 0 | -1.890431 | 1.260697  | -1.846802 |
| 63 | 1  | 0 | -0.032438 | 2.756364  | -1.975857 |
| 64 | 1  | 0 | -0.134060 | 4.916045  | -0.855723 |
| 65 | 1  | 0 | -0.096460 | 3.911088  | 0.582101  |
| 66 | 1  | 0 | -3.107821 | 1.334522  | 0.440537  |
| 67 | 1  | 0 | -3.862135 | 2.301427  | -0.800142 |
| 68 | 1  | 0 | -3.848033 | 3.800538  | 1.034999  |
| 69 | 1  | 0 | -2.327936 | 3.175707  | 1.657104  |
| 70 | 1  | 0 | -2.609310 | 4.944615  | -0.819526 |
| 71 | 1  | 0 | -2.010693 | 5.458467  | 0.750229  |

## Z-Cycloheptene formation

Seven A      Free Energy = -2253.737044

|    |   |   |           |           |           |
|----|---|---|-----------|-----------|-----------|
| 1  | 6 | 0 | 0.427999  | -1.440609 | 2.282565  |
| 2  | 1 | 0 | -0.162367 | -1.602206 | 3.197509  |
| 3  | 6 | 0 | 4.705866  | -3.041263 | 4.529961  |
| 4  | 1 | 0 | 4.722323  | -3.943163 | 3.906254  |
| 5  | 1 | 0 | 4.108146  | -3.295515 | 5.417484  |
| 6  | 6 | 0 | 1.882278  | -1.114862 | 2.645209  |
| 7  | 1 | 0 | 1.901784  | -0.189903 | 3.238244  |
| 8  | 1 | 0 | 2.434030  | -0.896635 | 1.721823  |
| 9  | 6 | 0 | 4.006108  | -1.907105 | 3.783192  |
| 10 | 1 | 0 | 4.579330  | -1.660123 | 2.880467  |
| 11 | 1 | 0 | 4.022704  | -0.999111 | 4.401776  |
| 12 | 6 | 0 | 2.571150  | -2.237730 | 3.404127  |
| 13 | 1 | 0 | 1.997939  | -2.478195 | 4.310656  |
| 14 | 1 | 0 | 2.554911  | -3.149935 | 2.792724  |
| 15 | 6 | 0 | -0.950522 | 1.015954  | -1.019023 |
| 16 | 7 | 0 | -1.248896 | 1.106712  | -2.349306 |
| 17 | 7 | 0 | -0.859835 | 2.287244  | -0.546202 |
| 18 | 6 | 0 | -1.541603 | 2.476952  | -2.765752 |
| 19 | 1 | 0 | -1.064206 | 2.702004  | -3.723882 |
| 20 | 1 | 0 | -2.625061 | 2.614554  | -2.886306 |
| 21 | 6 | 0 | -0.983026 | 3.290297  | -1.608356 |
| 22 | 1 | 0 | -0.000310 | 3.723984  | -1.837833 |
| 23 | 1 | 0 | -1.640252 | 4.105612  | -1.292393 |
| 24 | 6 | 0 | -0.439010 | 2.674637  | 0.757567  |
| 25 | 6 | 0 | 0.350041  | 3.389485  | 3.331419  |
| 26 | 6 | 0 | -1.418151 | 2.883715  | 1.733902  |
| 27 | 6 | 0 | 0.928316  | 2.796108  | 1.038050  |
| 28 | 6 | 0 | 1.296953  | 3.156598  | 2.332101  |
| 29 | 6 | 0 | -0.999957 | 3.244465  | 3.014731  |
| 30 | 1 | 0 | 2.355249  | 3.240709  | 2.570505  |
| 31 | 1 | 0 | -1.748668 | 3.400621  | 3.787748  |
| 32 | 6 | 0 | -1.624254 | -0.013490 | -3.155514 |
| 33 | 6 | 0 | -2.331478 | -2.243293 | -4.673755 |
| 34 | 6 | 0 | -0.665434 | -0.597433 | -3.997823 |
| 35 | 6 | 0 | -2.953827 | -0.467204 | -3.127491 |
| 36 | 6 | 0 | -3.276588 | -1.590649 | -3.883534 |
| 37 | 6 | 0 | -1.042306 | -1.719095 | -4.734769 |
| 38 | 1 | 0 | -4.296706 | -1.966431 | -3.850817 |
| 39 | 1 | 0 | -0.303647 | -2.194892 | -5.375975 |
| 40 | 6 | 0 | 0.701659  | -0.010299 | -4.170946 |
| 41 | 1 | 0 | 1.461135  | -0.790979 | -4.240881 |
| 42 | 1 | 0 | 0.981018  | 0.641194  | -3.342929 |
| 43 | 1 | 0 | 0.745421  | 0.573644  | -5.098358 |
| 44 | 6 | 0 | -4.025188 | 0.261534  | -2.374553 |
| 45 | 1 | 0 | -3.642342 | 0.795967  | -1.503813 |
| 46 | 1 | 0 | -4.788897 | -0.428880 | -2.014439 |
| 47 | 1 | 0 | -4.521394 | 0.988425  | -3.029784 |
| 48 | 6 | 0 | 1.955099  | 2.465785  | 0.000320  |
| 49 | 1 | 0 | 1.884247  | 3.120018  | -0.874890 |
| 50 | 1 | 0 | 1.834326  | 1.438505  | -0.362831 |
| 51 | 1 | 0 | 2.964894  | 2.563629  | 0.401950  |
| 52 | 6 | 0 | -2.861329 | 2.634371  | 1.424133  |
| 53 | 1 | 0 | -3.033985 | 1.572658  | 1.210274  |
| 54 | 1 | 0 | -3.195948 | 3.187040  | 0.540683  |

|    |    |   |           |           |           |
|----|----|---|-----------|-----------|-----------|
| 55 | 1  | 0 | -3.500942 | 2.917460  | 2.261406  |
| 56 | 6  | 0 | -2.691973 | -3.485059 | -5.429831 |
| 57 | 1  | 0 | -2.557436 | -4.374228 | -4.804659 |
| 58 | 1  | 0 | -2.064922 | -3.616747 | -6.314164 |
| 59 | 1  | 0 | -3.736328 | -3.475837 | -5.749542 |
| 60 | 6  | 0 | 0.780627  | 3.793876  | 4.708224  |
| 61 | 1  | 0 | 1.656669  | 3.229738  | 5.038048  |
| 62 | 1  | 0 | -0.014352 | 3.643876  | 5.440914  |
| 63 | 1  | 0 | 1.057068  | 4.852960  | 4.740158  |
| 64 | 44 | 0 | -0.696307 | -0.696427 | -0.178991 |
| 65 | 6  | 0 | 6.094747  | -2.693409 | 4.950701  |
| 66 | 1  | 0 | 6.188673  | -1.822441 | 5.601836  |
| 67 | 6  | 0 | 7.195058  | -3.340307 | 4.581078  |
| 68 | 1  | 0 | 7.149014  | -4.209262 | 3.929690  |
| 69 | 1  | 0 | 8.181039  | -3.034032 | 4.913207  |
| 70 | 1  | 0 | 0.391538  | -2.386757 | 1.722585  |
| 71 | 6  | 0 | -0.166414 | -0.317589 | 1.503310  |
| 72 | 1  | 0 | -0.228061 | 0.644765  | 2.020724  |
| 73 | 17 | 0 | 1.372366  | -1.167488 | -1.162300 |
| 74 | 17 | 0 | -2.891113 | -1.370512 | 0.208495  |

Seven B Free Energy = -2253.749257

|    |   |   |           |           |           |
|----|---|---|-----------|-----------|-----------|
| 1  | 6 | 0 | -0.588456 | -1.571158 | 2.422340  |
| 2  | 1 | 0 | -0.956806 | -0.770499 | 3.085097  |
| 3  | 6 | 0 | -0.439025 | -3.975617 | 0.292310  |
| 4  | 1 | 0 | -1.345842 | -3.411421 | 0.537308  |
| 5  | 1 | 0 | -0.804546 | -4.817487 | -0.311225 |
| 6  | 6 | 0 | 0.190724  | -2.594790 | 3.256063  |
| 7  | 1 | 0 | -0.510157 | -3.138348 | 3.902208  |
| 8  | 1 | 0 | 0.869704  | -2.053967 | 3.928307  |
| 9  | 6 | 0 | 0.250463  | -4.547433 | 1.534111  |
| 10 | 1 | 0 | 0.957706  | -5.317072 | 1.200094  |
| 11 | 1 | 0 | -0.498484 | -5.081119 | 2.132781  |
| 12 | 6 | 0 | 1.018753  | -3.579173 | 2.432328  |
| 13 | 1 | 0 | 1.745662  | -3.013955 | 1.831981  |
| 14 | 1 | 0 | 1.624095  | -4.176175 | 3.123688  |
| 15 | 6 | 0 | 0.083635  | 1.398720  | -0.280549 |
| 16 | 7 | 0 | 0.193836  | 2.059806  | -1.460966 |
| 17 | 7 | 0 | 0.025487  | 2.318028  | 0.704364  |
| 18 | 6 | 0 | 0.020265  | 3.504627  | -1.306416 |
| 19 | 1 | 0 | 0.744417  | 4.053871  | -1.914066 |
| 20 | 1 | 0 | -0.989362 | 3.807324  | -1.618798 |
| 21 | 6 | 0 | 0.238358  | 3.679720  | 0.193230  |
| 22 | 1 | 0 | 1.257755  | 4.014453  | 0.426710  |
| 23 | 1 | 0 | -0.461409 | 4.380086  | 0.656209  |
| 24 | 6 | 0 | -0.085108 | 2.037308  | 2.098019  |
| 25 | 6 | 0 | -0.338837 | 1.454223  | 4.811061  |
| 26 | 6 | 0 | -1.364766 | 1.990691  | 2.666413  |
| 27 | 6 | 0 | 1.072883  | 1.827482  | 2.859053  |
| 28 | 6 | 0 | 0.918622  | 1.526839  | 4.211544  |
| 29 | 6 | 0 | -1.465319 | 1.705292  | 4.027111  |
| 30 | 1 | 0 | 1.807154  | 1.340393  | 4.810833  |
| 31 | 1 | 0 | -2.452723 | 1.659312  | 4.481274  |
| 32 | 6 | 0 | 0.054356  | 1.338310  | -2.691023 |
| 33 | 6 | 0 | -0.199752 | -0.317919 | -4.921028 |
| 34 | 6 | 0 | 1.202304  | 1.008938  | -3.430143 |
| 35 | 6 | 0 | -1.231073 | 0.949927  | -3.114004 |

|    |    |   |           |           |           |
|----|----|---|-----------|-----------|-----------|
| 36 | 6  | 0 | -1.327349 | 0.108829  | -4.220847 |
| 37 | 6  | 0 | 1.047444  | 0.167340  | -4.530729 |
| 38 | 1  | 0 | -2.313187 | -0.222497 | -4.539156 |
| 39 | 1  | 0 | 1.932082  | -0.121274 | -5.093736 |
| 40 | 6  | 0 | 2.544813  | 1.580526  | -3.100843 |
| 41 | 1  | 0 | 3.336697  | 0.846760  | -3.257201 |
| 42 | 1  | 0 | 2.607130  | 1.911090  | -2.064953 |
| 43 | 1  | 0 | 2.753328  | 2.438363  | -3.752261 |
| 44 | 6  | 0 | -2.472229 | 1.489422  | -2.471777 |
| 45 | 1  | 0 | -2.338180 | 1.715015  | -1.413489 |
| 46 | 1  | 0 | -3.293169 | 0.775213  | -2.538688 |
| 47 | 1  | 0 | -2.782489 | 2.409517  | -2.983052 |
| 48 | 6  | 0 | 2.427044  | 1.891735  | 2.225409  |
| 49 | 1  | 0 | 2.687723  | 2.916614  | 1.938915  |
| 50 | 1  | 0 | 2.483489  | 1.280950  | 1.316691  |
| 51 | 1  | 0 | 3.199209  | 1.543057  | 2.913247  |
| 52 | 6  | 0 | -2.584446 | 2.184569  | 1.823219  |
| 53 | 1  | 0 | -2.727455 | 1.328300  | 1.152189  |
| 54 | 1  | 0 | -2.511341 | 3.074893  | 1.190301  |
| 55 | 1  | 0 | -3.478788 | 2.281986  | 2.440892  |
| 56 | 6  | 0 | -0.325686 | -1.291671 | -6.051745 |
| 57 | 1  | 0 | -0.340300 | -2.321213 | -5.676484 |
| 58 | 1  | 0 | 0.511687  | -1.216131 | -6.748446 |
| 59 | 1  | 0 | -1.251703 | -1.145489 | -6.612495 |
| 60 | 6  | 0 | -0.478823 | 1.072313  | 6.252714  |
| 61 | 1  | 0 | -0.563047 | -0.015093 | 6.361345  |
| 62 | 1  | 0 | -1.374003 | 1.507144  | 6.702616  |
| 63 | 1  | 0 | 0.385684  | 1.385405  | 6.841829  |
| 64 | 44 | 0 | 0.091771  | -0.585662 | -0.357332 |
| 65 | 6  | 0 | 0.429577  | -3.129931 | -0.587714 |
| 66 | 1  | 0 | 1.500493  | -3.109299 | -0.386354 |
| 67 | 6  | 0 | -0.012982 | -2.490050 | -1.704759 |
| 68 | 1  | 0 | -1.051041 | -2.560588 | -2.019693 |
| 69 | 1  | 0 | 0.702869  | -2.062984 | -2.407682 |
| 70 | 1  | 0 | -1.479987 | -1.993179 | 1.957431  |
| 71 | 6  | 0 | 0.294830  | -0.906038 | 1.431178  |
| 72 | 1  | 0 | 1.278123  | -0.627283 | 1.853967  |
| 73 | 17 | 0 | 2.507526  | -0.577175 | -0.623556 |
| 74 | 17 | 0 | -2.325637 | -0.874489 | -0.277383 |

Seven BC Free Energy = -2253.740504

|    |    |   |          |           |           |
|----|----|---|----------|-----------|-----------|
| 1  | 44 | 0 | 0.394029 | -0.625379 | -0.109796 |
| 2  | 17 | 0 | 0.353520 | -0.599615 | -2.537687 |
| 3  | 17 | 0 | 0.496663 | -0.913409 | 2.305827  |
| 4  | 6  | 0 | 1.401794 | -2.469107 | -0.277086 |
| 5  | 1  | 0 | 0.985598 | -2.913327 | -1.178794 |
| 6  | 1  | 0 | 1.298245 | -3.028733 | 0.652071  |
| 7  | 6  | 0 | 1.862116 | 0.511138  | -0.163813 |
| 8  | 1  | 0 | 2.182315 | 0.821018  | -1.174917 |
| 9  | 6  | 0 | 2.511022 | -1.595897 | -0.403979 |
| 10 | 1  | 0 | 2.793781 | -1.358006 | -1.429896 |
| 11 | 6  | 0 | 2.542530 | 1.234693  | 0.944070  |
| 12 | 1  | 0 | 1.928671 | 2.138030  | 1.064896  |
| 13 | 1  | 0 | 2.439983 | 0.705691  | 1.895441  |
| 14 | 6  | 0 | 3.624565 | -1.604416 | 0.615160  |
| 15 | 1  | 0 | 3.222670 | -1.363435 | 1.607108  |
| 16 | 1  | 0 | 3.940731 | -2.651813 | 0.692856  |

|    |   |   |           |           |           |
|----|---|---|-----------|-----------|-----------|
| 17 | 6 | 0 | 3.986335  | 1.647690  | 0.668337  |
| 18 | 1 | 0 | 4.212776  | 2.548776  | 1.250084  |
| 19 | 1 | 0 | 4.089675  | 1.937901  | -0.387138 |
| 20 | 6 | 0 | 4.851173  | -0.748394 | 0.262722  |
| 21 | 1 | 0 | 4.859604  | -0.554559 | -0.819051 |
| 22 | 1 | 0 | 5.750623  | -1.342798 | 0.452740  |
| 23 | 6 | 0 | 5.003916  | 0.570423  | 1.015409  |
| 24 | 1 | 0 | 6.011321  | 0.962664  | 0.833305  |
| 25 | 1 | 0 | 4.952906  | 0.368899  | 2.094176  |
| 26 | 6 | 0 | -1.409457 | 0.289297  | 0.133307  |
| 27 | 7 | 0 | -2.548149 | -0.407429 | -0.035083 |
| 28 | 7 | 0 | -1.724232 | 1.519232  | 0.580915  |
| 29 | 6 | 0 | -3.726295 | 0.322019  | 0.444587  |
| 30 | 1 | 0 | -4.553945 | 0.241883  | -0.264499 |
| 31 | 1 | 0 | -4.060794 | -0.093348 | 1.404744  |
| 32 | 6 | 0 | -3.181288 | 1.739083  | 0.578466  |
| 33 | 1 | 0 | -3.460714 | 2.379236  | -0.269552 |
| 34 | 1 | 0 | -3.499733 | 2.239549  | 1.495863  |
| 35 | 6 | 0 | -0.801409 | 2.595672  | 0.753832  |
| 36 | 6 | 0 | 0.988166  | 4.704262  | 1.113783  |
| 37 | 6 | 0 | -0.473262 | 2.994292  | 2.055332  |
| 38 | 6 | 0 | -0.275208 | 3.241984  | -0.375142 |
| 39 | 6 | 0 | 0.624564  | 4.285876  | -0.167153 |
| 40 | 6 | 0 | 0.422271  | 4.053588  | 2.208779  |
| 41 | 1 | 0 | 1.044694  | 4.793076  | -1.033282 |
| 42 | 1 | 0 | 0.691743  | 4.368452  | 3.214317  |
| 43 | 6 | 0 | -2.555432 | -1.734028 | -0.572454 |
| 44 | 6 | 0 | -2.385988 | -4.266336 | -1.722850 |
| 45 | 6 | 0 | -2.755307 | -1.872228 | -1.958194 |
| 46 | 6 | 0 | -2.342056 | -2.841067 | 0.258282  |
| 47 | 6 | 0 | -2.245483 | -4.097481 | -0.350788 |
| 48 | 6 | 0 | -2.663387 | -3.143025 | -2.507732 |
| 49 | 1 | 0 | -2.061970 | -4.966596 | 0.277504  |
| 50 | 1 | 0 | -2.788980 | -3.259505 | -3.581554 |
| 51 | 6 | 0 | -3.048062 | -0.677701 | -2.810078 |
| 52 | 1 | 0 | -4.013825 | -0.226129 | -2.554115 |
| 53 | 1 | 0 | -3.080439 | -0.951111 | -3.865452 |
| 54 | 1 | 0 | -2.276273 | 0.086870  | -2.692159 |
| 55 | 6 | 0 | -2.282486 | -2.731965 | 1.750640  |
| 56 | 1 | 0 | -2.188501 | -1.703766 | 2.098033  |
| 57 | 1 | 0 | -1.425860 | -3.274112 | 2.158016  |
| 58 | 1 | 0 | -3.185161 | -3.168142 | 2.193489  |
| 59 | 6 | 0 | -0.652725 | 2.819075  | -1.759831 |
| 60 | 1 | 0 | -1.735787 | 2.704597  | -1.870853 |
| 61 | 1 | 0 | -0.212071 | 1.851319  | -2.027592 |
| 62 | 1 | 0 | -0.318454 | 3.552262  | -2.495794 |
| 63 | 6 | 0 | -1.043527 | 2.281872  | 3.240114  |
| 64 | 1 | 0 | -0.830192 | 1.209127  | 3.185166  |
| 65 | 1 | 0 | -2.131554 | 2.395577  | 3.299933  |
| 66 | 1 | 0 | -0.623883 | 2.668743  | 4.169941  |
| 67 | 6 | 0 | -2.235785 | -5.615655 | -2.356064 |
| 68 | 1 | 0 | -1.297650 | -5.682896 | -2.916678 |
| 69 | 1 | 0 | -3.041069 | -5.819911 | -3.066748 |
| 70 | 1 | 0 | -2.230849 | -6.413958 | -1.611580 |
| 71 | 6 | 0 | 1.978827  | 5.812915  | 1.300200  |
| 72 | 1 | 0 | 2.994319  | 5.480742  | 1.058747  |
| 73 | 1 | 0 | 1.990340  | 6.175680  | 2.329530  |
| 74 | 1 | 0 | 1.762614  | 6.661016  | 0.645158  |

Seven C      Free Energy = -2253.750752

|    |    |   |           |           |           |
|----|----|---|-----------|-----------|-----------|
| 1  | 44 | 0 | 0.449802  | -0.216842 | -0.297516 |
| 2  | 17 | 0 | 0.521273  | 1.136943  | -2.312315 |
| 3  | 17 | 0 | 0.392823  | -1.689539 | 1.625114  |
| 4  | 6  | 0 | 1.328374  | -1.640653 | -1.285216 |
| 5  | 1  | 0 | 1.216530  | -1.622802 | -2.370566 |
| 6  | 1  | 0 | 1.277434  | -2.629759 | -0.824311 |
| 7  | 6  | 0 | 2.239775  | 0.521837  | 0.056133  |
| 8  | 1  | 0 | 2.442918  | 1.401838  | -0.563339 |
| 9  | 6  | 0 | 2.563757  | -0.795801 | -0.785183 |
| 10 | 1  | 0 | 2.965618  | -0.376374 | -1.713608 |
| 11 | 6  | 0 | 2.770546  | 0.674983  | 1.458519  |
| 12 | 1  | 0 | 2.232993  | 1.524432  | 1.894866  |
| 13 | 1  | 0 | 2.529673  | -0.192776 | 2.078310  |
| 14 | 6  | 0 | 3.560526  | -1.721865 | -0.078882 |
| 15 | 1  | 0 | 3.124666  | -2.066609 | 0.866340  |
| 16 | 1  | 0 | 3.662999  | -2.614422 | -0.704112 |
| 17 | 6  | 0 | 4.274839  | 0.964014  | 1.499630  |
| 18 | 1  | 0 | 4.510199  | 1.483352  | 2.435570  |
| 19 | 1  | 0 | 4.538275  | 1.663706  | 0.693816  |
| 20 | 6  | 0 | 4.947040  | -1.109171 | 0.131271  |
| 21 | 1  | 0 | 5.207175  | -0.495839 | -0.743371 |
| 22 | 1  | 0 | 5.680013  | -1.923285 | 0.142824  |
| 23 | 6  | 0 | 5.129704  | -0.290245 | 1.404579  |
| 24 | 1  | 0 | 6.186806  | -0.015093 | 1.498966  |
| 25 | 1  | 0 | 4.907995  | -0.931856 | 2.268260  |
| 26 | 6  | 0 | -1.476474 | 0.344116  | -0.042689 |
| 27 | 7  | 0 | -2.544849 | -0.445812 | -0.224128 |
| 28 | 7  | 0 | -1.889050 | 1.578421  | 0.284220  |
| 29 | 6  | 0 | -3.806994 | 0.297619  | -0.102616 |
| 30 | 1  | 0 | -4.290824 | 0.376805  | -1.084053 |
| 31 | 1  | 0 | -4.492963 | -0.225795 | 0.568677  |
| 32 | 6  | 0 | -3.348341 | 1.649317  | 0.443059  |
| 33 | 1  | 0 | -3.752581 | 2.497213  | -0.116013 |
| 34 | 1  | 0 | -3.604565 | 1.789245  | 1.500866  |
| 35 | 6  | 0 | -1.006632 | 2.673904  | 0.537535  |
| 36 | 6  | 0 | 0.812384  | 4.738019  | 0.970472  |
| 37 | 6  | 0 | -0.292207 | 2.706540  | 1.742182  |
| 38 | 6  | 0 | -0.874367 | 3.677648  | -0.432922 |
| 39 | 6  | 0 | 0.045063  | 4.694147  | -0.193840 |
| 40 | 6  | 0 | 0.617567  | 3.747644  | 1.930260  |
| 41 | 1  | 0 | 0.178543  | 5.464914  | -0.949321 |
| 42 | 1  | 0 | 1.185408  | 3.783875  | 2.857750  |
| 43 | 6  | 0 | -2.482777 | -1.843911 | -0.522124 |
| 44 | 6  | 0 | -2.269021 | -4.566954 | -1.058998 |
| 45 | 6  | 0 | -2.241653 | -2.256860 | -1.837966 |
| 46 | 6  | 0 | -2.665011 | -2.759574 | 0.524400  |
| 47 | 6  | 0 | -2.549448 | -4.113406 | 0.230651  |
| 48 | 6  | 0 | -2.130737 | -3.627451 | -2.076900 |
| 49 | 1  | 0 | -2.662531 | -4.834715 | 1.036730  |
| 50 | 1  | 0 | -1.935981 | -3.965975 | -3.092181 |
| 51 | 6  | 0 | -2.102680 | -1.272789 | -2.957275 |
| 52 | 1  | 0 | -2.849683 | -0.475523 | -2.898579 |
| 53 | 1  | 0 | -2.216072 | -1.767771 | -3.923490 |
| 54 | 1  | 0 | -1.129572 | -0.770415 | -2.949934 |
| 55 | 6  | 0 | -2.972532 | -2.298996 | 1.915140  |

|    |   |   |           |           |           |
|----|---|---|-----------|-----------|-----------|
| 56 | 1 | 0 | -2.415149 | -1.395506 | 2.173249  |
| 57 | 1 | 0 | -2.707564 | -3.064807 | 2.645501  |
| 58 | 1 | 0 | -4.041987 | -2.087111 | 2.038443  |
| 59 | 6 | 0 | -1.691793 | 3.661006  | -1.686673 |
| 60 | 1 | 0 | -2.674915 | 4.120769  | -1.526562 |
| 61 | 1 | 0 | -1.842495 | 2.642962  | -2.053595 |
| 62 | 1 | 0 | -1.197745 | 4.223033  | -2.480417 |
| 63 | 6 | 0 | -0.492668 | 1.662415  | 2.798162  |
| 64 | 1 | 0 | -0.080656 | 0.687943  | 2.510204  |
| 65 | 1 | 0 | -1.554109 | 1.494859  | 3.007229  |
| 66 | 1 | 0 | -0.012014 | 1.959604  | 3.732311  |
| 67 | 6 | 0 | -2.115850 | -6.032070 | -1.331950 |
| 68 | 1 | 0 | -2.025727 | -6.237026 | -2.400189 |
| 69 | 1 | 0 | -2.965912 | -6.604315 | -0.949629 |
| 70 | 1 | 0 | -1.222335 | -6.432110 | -0.842052 |
| 71 | 6 | 0 | 1.831171  | 5.817798  | 1.172372  |
| 72 | 1 | 0 | 2.725011  | 5.631262  | 0.567633  |
| 73 | 1 | 0 | 2.150628  | 5.882569  | 2.214194  |
| 74 | 1 | 0 | 1.447836  | 6.796893  | 0.873745  |

Seven CD Free Energy = -2253.735613

|    |    |   |           |           |           |
|----|----|---|-----------|-----------|-----------|
| 1  | 44 | 0 | 0.573301  | 0.077403  | -0.193590 |
| 2  | 17 | 0 | 0.601482  | 1.208941  | -2.343545 |
| 3  | 17 | 0 | 0.668145  | -1.108034 | 1.927516  |
| 4  | 6  | 0 | 0.936317  | -1.512907 | -1.017236 |
| 5  | 1  | 0 | 0.983804  | -1.598589 | -2.112018 |
| 6  | 1  | 0 | 1.091565  | -2.435031 | -0.441139 |
| 7  | 6  | 0 | 2.628728  | 0.848987  | 0.005929  |
| 8  | 1  | 0 | 2.525864  | 1.719771  | -0.644695 |
| 9  | 6  | 0 | 2.875304  | -0.364739 | -0.662223 |
| 10 | 1  | 0 | 2.910207  | -0.301098 | -1.748810 |
| 11 | 6  | 0 | 3.147740  | 1.114680  | 1.396304  |
| 12 | 1  | 0 | 2.732693  | 2.064963  | 1.746243  |
| 13 | 1  | 0 | 2.800268  | 0.346913  | 2.094405  |
| 14 | 6  | 0 | 3.643215  | -1.483462 | -0.008296 |
| 15 | 1  | 0 | 3.172528  | -1.751199 | 0.945910  |
| 16 | 1  | 0 | 3.599646  | -2.375354 | -0.640022 |
| 17 | 6  | 0 | 4.680882  | 1.171051  | 1.422544  |
| 18 | 1  | 0 | 4.995482  | 1.719699  | 2.317489  |
| 19 | 1  | 0 | 5.048152  | 1.755754  | 0.567710  |
| 20 | 6  | 0 | 5.107137  | -1.086487 | 0.221628  |
| 21 | 1  | 0 | 5.500011  | -0.595245 | -0.679478 |
| 22 | 1  | 0 | 5.696190  | -2.002585 | 0.339722  |
| 23 | 6  | 0 | 5.345700  | -0.202266 | 1.442452  |
| 24 | 1  | 0 | 6.426336  | -0.072007 | 1.573195  |
| 25 | 1  | 0 | 4.998850  | -0.741869 | 2.334611  |
| 26 | 6  | 0 | -1.421485 | 0.340300  | 0.000070  |
| 27 | 7  | 0 | -2.443837 | -0.531157 | -0.075921 |
| 28 | 7  | 0 | -1.920810 | 1.562375  | 0.271936  |
| 29 | 6  | 0 | -3.743147 | 0.156150  | 0.002916  |
| 30 | 1  | 0 | -4.192142 | 0.220756  | -0.997167 |
| 31 | 1  | 0 | -4.433473 | -0.393563 | 0.646780  |
| 32 | 6  | 0 | -3.358511 | 1.524422  | 0.554977  |
| 33 | 1  | 0 | -3.878051 | 2.350422  | 0.063279  |
| 34 | 1  | 0 | -3.532993 | 1.605421  | 1.636964  |
| 35 | 6  | 0 | -1.054445 | 2.668107  | 0.536895  |
| 36 | 6  | 0 | 0.795479  | 4.717767  | 0.925583  |



|    |   |   |           |           |           |
|----|---|---|-----------|-----------|-----------|
| 37 | 6 | 0 | -0.362776 | 2.736995  | 1.756227  |
| 38 | 6 | 0 | -0.898543 | 3.647693  | -0.459715 |
| 39 | 6 | 0 | 0.035133  | 4.654055  | -0.244666 |
| 40 | 6 | 0 | 0.566296  | 3.769252  | 1.916105  |
| 41 | 1 | 0 | 0.188381  | 5.399566  | -1.021180 |
| 42 | 1 | 0 | 1.118691  | 3.829862  | 2.851814  |
| 43 | 6 | 0 | -2.338357 | -1.905328 | -0.456502 |
| 44 | 6 | 0 | -2.097925 | -4.586571 | -1.173357 |
| 45 | 6 | 0 | -2.181683 | -2.234423 | -1.808193 |
| 46 | 6 | 0 | -2.416722 | -2.885209 | 0.542581  |
| 47 | 6 | 0 | -2.288829 | -4.217141 | 0.158748  |
| 48 | 6 | 0 | -2.057328 | -3.584009 | -2.139899 |
| 49 | 1 | 0 | -2.335425 | -4.987882 | 0.924904  |
| 50 | 1 | 0 | -1.930671 | -3.855324 | -3.185714 |
| 51 | 6 | 0 | -2.141290 | -1.174170 | -2.863523 |
| 52 | 1 | 0 | -3.020543 | -0.522604 | -2.818448 |
| 53 | 1 | 0 | -2.112145 | -1.617015 | -3.860639 |
| 54 | 1 | 0 | -1.268183 | -0.520147 | -2.760447 |
| 55 | 6 | 0 | -2.619065 | -2.506198 | 1.975163  |
| 56 | 1 | 0 | -1.803004 | -1.865726 | 2.322997  |
| 57 | 1 | 0 | -2.651795 | -3.390652 | 2.613068  |
| 58 | 1 | 0 | -3.556345 | -1.958268 | 2.122751  |
| 59 | 6 | 0 | -1.719516 | 3.610051  | -1.709758 |
| 60 | 1 | 0 | -2.723411 | 4.015205  | -1.532358 |
| 61 | 1 | 0 | -1.826386 | 2.590668  | -2.086140 |
| 62 | 1 | 0 | -1.260105 | 4.207528  | -2.498236 |
| 63 | 6 | 0 | -0.647394 | 1.820682  | 2.907549  |
| 64 | 1 | 0 | 0.275092  | 1.467569  | 3.373904  |
| 65 | 1 | 0 | -1.207900 | 0.930177  | 2.624672  |
| 66 | 1 | 0 | -1.218284 | 2.358325  | 3.673565  |
| 67 | 6 | 0 | -1.936407 | -6.028199 | -1.548434 |
| 68 | 1 | 0 | -1.993433 | -6.173071 | -2.628822 |
| 69 | 1 | 0 | -2.702811 | -6.654071 | -1.083126 |
| 70 | 1 | 0 | -0.968502 | -6.417451 | -1.216208 |
| 71 | 6 | 0 | 1.849940  | 5.767406  | 1.097772  |
| 72 | 1 | 0 | 2.794247  | 5.448080  | 0.642572  |
| 73 | 1 | 0 | 2.052839  | 5.968501  | 2.151679  |
| 74 | 1 | 0 | 1.569468  | 6.708105  | 0.618391  |

Seven D Free Energy = -2253.738732

|    |    |   |          |           |           |
|----|----|---|----------|-----------|-----------|
| 1  | 44 | 0 | 0.503604 | 0.058122  | -0.241542 |
| 2  | 17 | 0 | 0.538248 | 1.065225  | -2.441725 |
| 3  | 17 | 0 | 0.748089 | -0.970275 | 1.943569  |
| 4  | 6  | 0 | 0.501535 | -1.607496 | -0.943528 |
| 5  | 1  | 0 | 0.480963 | -1.768636 | -2.032623 |
| 6  | 1  | 0 | 0.575945 | -2.508234 | -0.316955 |
| 7  | 6  | 0 | 2.790379 | 1.020784  | -0.006145 |
| 8  | 1  | 0 | 2.417005 | 1.862340  | -0.594528 |
| 9  | 6  | 0 | 3.038154 | -0.136910 | -0.677347 |
| 10 | 1  | 0 | 2.829462 | -0.151912 | -1.745097 |
| 11 | 6  | 0 | 3.277670 | 1.296705  | 1.387762  |
| 12 | 1  | 0 | 2.919191 | 2.282113  | 1.699542  |
| 13 | 1  | 0 | 2.838669 | 0.574943  | 2.087487  |
| 14 | 6  | 0 | 3.742639 | -1.311134 | -0.065506 |
| 15 | 1  | 0 | 3.213095 | -1.610930 | 0.849221  |
| 16 | 1  | 0 | 3.688212 | -2.163131 | -0.749585 |
| 17 | 6  | 0 | 4.806538 | 1.242583  | 1.500176  |

|    |   |   |           |           |           |
|----|---|---|-----------|-----------|-----------|
| 18 | 1 | 0 | 5.100535  | 1.760637  | 2.420081  |
| 19 | 1 | 0 | 5.259273  | 1.811480  | 0.676781  |
| 20 | 6 | 0 | 5.205538  | -1.007252 | 0.279197  |
| 21 | 1 | 0 | 5.692062  | -0.515241 | -0.573685 |
| 22 | 1 | 0 | 5.731812  | -1.958293 | 0.416616  |
| 23 | 6 | 0 | 5.389426  | -0.167735 | 1.539606  |
| 24 | 1 | 0 | 6.460485  | -0.099667 | 1.763255  |
| 25 | 1 | 0 | 4.940238  | -0.706323 | 2.385711  |
| 26 | 6 | 0 | -1.452746 | 0.278775  | -0.037883 |
| 27 | 7 | 0 | -2.496472 | -0.573246 | -0.095279 |
| 28 | 7 | 0 | -1.931322 | 1.510150  | 0.255879  |
| 29 | 6 | 0 | -3.779745 | 0.132833  | 0.032680  |
| 30 | 1 | 0 | -4.263386 | 0.212262  | -0.949996 |
| 31 | 1 | 0 | -4.455872 | -0.411881 | 0.696361  |
| 32 | 6 | 0 | -3.357561 | 1.491436  | 0.581571  |
| 33 | 1 | 0 | -3.878868 | 2.328121  | 0.109606  |
| 34 | 1 | 0 | -3.501722 | 1.567366  | 1.668563  |
| 35 | 6 | 0 | -1.041995 | 2.601458  | 0.504032  |
| 36 | 6 | 0 | 0.855568  | 4.610870  | 0.869736  |
| 37 | 6 | 0 | -0.379761 | 2.695315  | 1.739508  |
| 38 | 6 | 0 | -0.840517 | 3.545891  | -0.517784 |
| 39 | 6 | 0 | 0.119809  | 4.531340  | -0.314236 |
| 40 | 6 | 0 | 0.572404  | 3.706317  | 1.888791  |
| 41 | 1 | 0 | 0.310425  | 5.247879  | -1.109627 |
| 42 | 1 | 0 | 1.104314  | 3.783038  | 2.835042  |
| 43 | 6 | 0 | -2.442867 | -1.941874 | -0.493359 |
| 44 | 6 | 0 | -2.388233 | -4.621064 | -1.251722 |
| 45 | 6 | 0 | -2.412486 | -2.260781 | -1.858454 |
| 46 | 6 | 0 | -2.470436 | -2.929350 | 0.500669  |
| 47 | 6 | 0 | -2.440403 | -4.261651 | 0.095293  |
| 48 | 6 | 0 | -2.381142 | -3.608970 | -2.211125 |
| 49 | 1 | 0 | -2.457139 | -5.040031 | 0.854846  |
| 50 | 1 | 0 | -2.353420 | -3.873559 | -3.265714 |
| 51 | 6 | 0 | -2.392611 | -1.182658 | -2.896163 |
| 52 | 1 | 0 | -3.275125 | -0.536914 | -2.829966 |
| 53 | 1 | 0 | -2.372301 | -1.606054 | -3.901704 |
| 54 | 1 | 0 | -1.519399 | -0.528425 | -2.787529 |
| 55 | 6 | 0 | -2.500417 | -2.557059 | 1.948669  |
| 56 | 1 | 0 | -1.554993 | -2.087159 | 2.243383  |
| 57 | 1 | 0 | -2.657604 | -3.435026 | 2.577452  |
| 58 | 1 | 0 | -3.294779 | -1.836957 | 2.171121  |
| 59 | 6 | 0 | -1.649202 | 3.508782  | -1.776019 |
| 60 | 1 | 0 | -2.617235 | 4.003381  | -1.627945 |
| 61 | 1 | 0 | -1.835754 | 2.485446  | -2.106358 |
| 62 | 1 | 0 | -1.135602 | 4.026676  | -2.586788 |
| 63 | 6 | 0 | -0.723787 | 1.824003  | 2.908725  |
| 64 | 1 | 0 | -1.246448 | 0.910231  | 2.625840  |
| 65 | 1 | 0 | -1.356353 | 2.381188  | 3.610188  |
| 66 | 1 | 0 | 0.172447  | 1.511567  | 3.448273  |
| 67 | 6 | 0 | -2.318724 | -6.061746 | -1.656921 |
| 68 | 1 | 0 | -2.735276 | -6.222553 | -2.653471 |
| 69 | 1 | 0 | -2.854823 | -6.705633 | -0.956072 |
| 70 | 1 | 0 | -1.281362 | -6.412455 | -1.682475 |
| 71 | 6 | 0 | 1.945832  | 5.625167  | 1.030012  |
| 72 | 1 | 0 | 2.906278  | 5.217517  | 0.693714  |
| 73 | 1 | 0 | 2.073245  | 5.922688  | 2.073288  |
| 74 | 1 | 0 | 1.756892  | 6.523297  | 0.438374  |

## Z-Cyclooctene formation

Eight A      Free Energy = -2293.027433

|    |    |   |            |           |           |
|----|----|---|------------|-----------|-----------|
| 1  | 6  | 0 | 1.961359   | -0.087208 | 4.413224  |
| 2  | 6  | 0 | 1.671392   | -1.043052 | 3.435479  |
| 3  | 6  | 0 | 0.867686   | -2.159431 | 3.702311  |
| 4  | 6  | 0 | 0.367896   | -2.308389 | 4.993770  |
| 5  | 6  | 0 | 0.643859   | -1.382440 | 6.002014  |
| 6  | 6  | 0 | 1.437910   | -0.278794 | 5.691998  |
| 7  | 7  | 0 | 2.172548   | -0.841118 | 2.118219  |
| 8  | 6  | 0 | 1.490464   | -0.281849 | 1.084678  |
| 9  | 7  | 0 | 2.264690   | -0.423676 | -0.027783 |
| 10 | 6  | 0 | 3.579534   | -0.992267 | 0.259590  |
| 11 | 6  | 0 | 3.414194   | -1.491790 | 1.689900  |
| 12 | 6  | 0 | 1.919606   | 0.085340  | -1.316830 |
| 13 | 6  | 0 | 2.293603   | 1.392742  | -1.669969 |
| 14 | 6  | 0 | 1.882081   | 1.876355  | -2.909626 |
| 15 | 6  | 0 | 1.147622   | 1.094324  | -3.799485 |
| 16 | 6  | 0 | 0.865737   | -0.224187 | -3.446755 |
| 17 | 6  | 0 | 1.254141   | -0.758223 | -2.220870 |
| 18 | 6  | 0 | 3.176104   | 2.227559  | -0.793147 |
| 19 | 6  | 0 | 1.022032   | -2.209510 | -1.930967 |
| 20 | 6  | 0 | 0.662443   | 1.660844  | -5.098207 |
| 21 | 44 | 0 | -0.217139  | 0.607744  | 1.015270  |
| 22 | 17 | 0 | -1.437094  | -1.063772 | -0.074927 |
| 23 | 6  | 0 | 0.482242   | -3.104065 | 2.607511  |
| 24 | 6  | 0 | 0.098579   | -1.577285 | 7.383871  |
| 25 | 6  | 0 | 2.732261   | 1.145535  | 4.057320  |
| 26 | 17 | 0 | 0.544049   | 2.810353  | 1.044574  |
| 27 | 6  | 0 | -0.912151  | 0.482593  | 2.672324  |
| 28 | 6  | 0 | -2.315813  | 0.973182  | 2.777660  |
| 29 | 6  | 0 | -3.259720  | -0.155348 | 3.206936  |
| 30 | 6  | 0 | -4.714640  | 0.284142  | 3.252242  |
| 31 | 6  | 0 | -5.665690  | -0.813399 | 3.702859  |
| 32 | 6  | 0 | -7.120505  | -0.371119 | 3.727666  |
| 33 | 6  | 0 | -8.077801  | -1.464572 | 4.198364  |
| 34 | 6  | 0 | -9.506890  | -1.035335 | 4.173377  |
| 35 | 6  | 0 | -10.310539 | -0.975378 | 5.229924  |
| 36 | 1  | 0 | -2.663008  | 1.396212  | 1.821527  |
| 37 | 1  | 0 | -2.356731  | 1.801552  | 3.501699  |
| 38 | 1  | 0 | -7.947648  | -2.344636 | 3.552047  |
| 39 | 1  | 0 | -7.805833  | -1.787603 | 5.210900  |
| 40 | 1  | 0 | -3.143389  | -0.995322 | 2.510096  |
| 41 | 1  | 0 | -2.945302  | -0.528417 | 4.191505  |
| 42 | 1  | 0 | -7.230375  | 0.506855  | 4.377637  |
| 43 | 1  | 0 | -5.013318  | 0.639711  | 2.256705  |
| 44 | 1  | 0 | -4.816150  | 1.152510  | 3.918297  |
| 45 | 1  | 0 | 4.243006   | -1.206956 | 2.344823  |
| 46 | 1  | 0 | 3.310275   | -2.583766 | 1.744646  |
| 47 | 1  | 0 | 4.356126   | -0.220449 | 0.172069  |
| 48 | 1  | 0 | 3.819848   | -1.790105 | -0.449818 |
| 49 | 1  | 0 | 2.145214   | 2.894839  | -3.185953 |
| 50 | 1  | 0 | 0.325876   | -0.859721 | -4.145082 |
| 51 | 1  | 0 | -0.268471  | -3.162875 | 5.213994  |
| 52 | 1  | 0 | 1.643828   | 0.462432  | 6.460786  |
| 53 | 1  | 0 | 3.702976   | 0.909720  | 3.609565  |
| 54 | 1  | 0 | 2.910203   | 1.768809  | 4.934901  |

|    |   |   |            |           |           |
|----|---|---|------------|-----------|-----------|
| 55 | 1 | 0 | 2.186129   | 1.744682  | 3.318806  |
| 56 | 1 | 0 | -0.135709  | -2.599465 | 1.854534  |
| 57 | 1 | 0 | -0.087756  | -3.948343 | 2.998468  |
| 58 | 1 | 0 | 1.351931   | -3.506695 | 2.078542  |
| 59 | 1 | 0 | 4.221982   | 2.129256  | -1.109669 |
| 60 | 1 | 0 | 3.110254   | 1.946830  | 0.258798  |
| 61 | 1 | 0 | 2.912151   | 3.284025  | -0.859433 |
| 62 | 1 | 0 | 1.021857   | -2.430618 | -0.863570 |
| 63 | 1 | 0 | 1.805297   | -2.815965 | -2.402571 |
| 64 | 1 | 0 | 0.064544   | -2.543271 | -2.333764 |
| 65 | 1 | 0 | -0.953961  | -1.871544 | 7.362584  |
| 66 | 1 | 0 | 0.636583   | -2.370084 | 7.913855  |
| 67 | 1 | 0 | 0.183435   | -0.669242 | 7.983387  |
| 68 | 1 | 0 | 1.342845   | 2.420813  | -5.488703 |
| 69 | 1 | 0 | -0.314038  | 2.140510  | -4.973001 |
| 70 | 1 | 0 | 0.543186   | 0.886079  | -5.858411 |
| 71 | 1 | 0 | -11.339899 | -0.642859 | 5.151649  |
| 72 | 1 | 0 | -9.966350  | -1.262810 | 6.220369  |
| 73 | 1 | 0 | -9.893839  | -0.732236 | 3.198915  |
| 74 | 1 | 0 | -0.457315  | 0.089509  | 3.586286  |
| 75 | 1 | 0 | -7.417343  | -0.033743 | 2.725246  |
| 76 | 1 | 0 | -5.558371  | -1.684459 | 3.041886  |
| 77 | 1 | 0 | -5.372966  | -1.164697 | 4.702376  |

Eight B Free Energy = -2293.035634

|    |    |   |           |           |           |
|----|----|---|-----------|-----------|-----------|
| 1  | 44 | 0 | -0.122330 | 0.180763  | -0.600977 |
| 2  | 17 | 0 | -0.190722 | -2.021912 | -1.631608 |
| 3  | 17 | 0 | -0.193294 | 2.494177  | 0.160863  |
| 4  | 6  | 0 | -2.456219 | 0.504688  | 1.318630  |
| 5  | 1  | 0 | -1.950685 | 0.547844  | 2.296635  |
| 6  | 1  | 0 | -2.497563 | 1.550150  | 0.999376  |
| 7  | 6  | 0 | -3.093398 | 1.473694  | -2.063976 |
| 8  | 1  | 0 | -2.942108 | 1.936745  | -1.078315 |
| 9  | 1  | 0 | -3.152084 | 2.320834  | -2.757817 |
| 10 | 6  | 0 | -3.855399 | -0.083044 | 1.512232  |
| 11 | 1  | 0 | -4.257848 | 0.284296  | 2.463843  |
| 12 | 1  | 0 | -3.786093 | -1.175226 | 1.617800  |
| 13 | 6  | 0 | -4.388423 | 0.666836  | -2.106897 |
| 14 | 1  | 0 | -5.247289 | 1.347736  | -2.070337 |
| 15 | 6  | 0 | -4.818617 | 0.282514  | 0.389140  |
| 16 | 1  | 0 | -5.838516 | 0.019325  | 0.690052  |
| 17 | 1  | 0 | -4.822326 | 1.377116  | 0.291971  |
| 18 | 6  | 0 | 1.376414  | -0.337810 | 0.595452  |
| 19 | 7  | 0 | 1.501737  | -0.683163 | 1.893442  |
| 20 | 7  | 0 | 2.616757  | -0.353671 | 0.044980  |
| 21 | 6  | 0 | 2.873970  | -1.097382 | 2.219438  |
| 22 | 1  | 0 | 3.183143  | -0.689213 | 3.184904  |
| 23 | 1  | 0 | 2.931219  | -2.192553 | 2.279813  |
| 24 | 6  | 0 | 3.668900  | -0.543808 | 1.043777  |
| 25 | 1  | 0 | 4.151458  | 0.415569  | 1.280058  |
| 26 | 1  | 0 | 4.436543  | -1.231237 | 0.679426  |
| 27 | 6  | 0 | 2.826080  | 0.092877  | -1.298280 |
| 28 | 6  | 0 | 2.978866  | 0.941048  | -3.950130 |
| 29 | 6  | 0 | 2.940262  | -0.868648 | -2.317169 |
| 30 | 6  | 0 | 2.894592  | 1.470575  | -1.571800 |
| 31 | 6  | 0 | 2.953534  | 1.865913  | -2.909035 |
| 32 | 6  | 0 | 3.000970  | -0.418333 | -3.632525 |

|    |   |   |           |           |           |
|----|---|---|-----------|-----------|-----------|
| 33 | 1 | 0 | 2.981739  | 2.929139  | -3.137046 |
| 34 | 1 | 0 | 3.058146  | -1.152369 | -4.432954 |
| 35 | 6 | 0 | 0.434198  | -0.826462 | 2.825809  |
| 36 | 6 | 0 | -1.673861 | -1.059074 | 4.631999  |
| 37 | 6 | 0 | 0.167337  | 0.236333  | 3.696910  |
| 38 | 6 | 0 | -0.311546 | -2.012999 | 2.849207  |
| 39 | 6 | 0 | -1.371102 | -2.097435 | 3.751019  |
| 40 | 6 | 0 | -0.886690 | 0.092365  | 4.599313  |
| 41 | 1 | 0 | -1.977328 | -3.000607 | 3.762449  |
| 42 | 1 | 0 | -1.115489 | 0.914630  | 5.273677  |
| 43 | 6 | 0 | 0.935660  | 1.515779  | 3.597741  |
| 44 | 1 | 0 | 2.017925  | 1.351264  | 3.603731  |
| 45 | 1 | 0 | 0.692826  | 2.187029  | 4.423058  |
| 46 | 1 | 0 | 0.698764  | 2.029581  | 2.657149  |
| 47 | 6 | 0 | 0.014829  | -3.142592 | 1.923136  |
| 48 | 1 | 0 | 0.081503  | -2.817681 | 0.878841  |
| 49 | 1 | 0 | -0.740310 | -3.928217 | 1.981220  |
| 50 | 1 | 0 | 0.978551  | -3.598182 | 2.177712  |
| 51 | 6 | 0 | 3.010642  | 2.490096  | -0.480815 |
| 52 | 1 | 0 | 4.069140  | 2.715367  | -0.300006 |
| 53 | 1 | 0 | 2.564844  | 2.160908  | 0.458062  |
| 54 | 1 | 0 | 2.515256  | 3.422594  | -0.753676 |
| 55 | 6 | 0 | 3.046221  | -2.329039 | -2.009042 |
| 56 | 1 | 0 | 2.496212  | -2.599748 | -1.107657 |
| 57 | 1 | 0 | 4.097915  | -2.610616 | -1.871148 |
| 58 | 1 | 0 | 2.647419  | -2.931066 | -2.826595 |
| 59 | 6 | 0 | -2.812248 | -1.186018 | 5.597549  |
| 60 | 1 | 0 | -3.174547 | -0.209540 | 5.925434  |
| 61 | 1 | 0 | -2.511784 | -1.737143 | 6.495139  |
| 62 | 1 | 0 | -3.652316 | -1.729793 | 5.158237  |
| 63 | 6 | 0 | 2.962648  | 1.393126  | -5.377880 |
| 64 | 1 | 0 | 3.400490  | 2.386756  | -5.493449 |
| 65 | 1 | 0 | 1.935664  | 1.448921  | -5.756171 |
| 66 | 1 | 0 | 3.504023  | 0.702885  | -6.028656 |
| 67 | 6 | 0 | -0.654002 | 1.146569  | -2.666432 |
| 68 | 1 | 0 | 0.109852  | 0.512073  | -3.120244 |
| 69 | 1 | 0 | -0.446210 | 2.210931  | -2.592053 |
| 70 | 6 | 0 | -1.893421 | 0.647179  | -2.420981 |
| 71 | 1 | 0 | -2.051954 | -0.415790 | -2.604081 |
| 72 | 6 | 0 | -1.528684 | -0.295015 | 0.476313  |
| 73 | 1 | 0 | -1.733550 | -1.382514 | 0.515261  |
| 74 | 1 | 0 | -4.450651 | 0.157899  | -3.076776 |
| 75 | 6 | 0 | -4.506305 | -0.352516 | -0.977216 |
| 76 | 1 | 0 | -3.578959 | -0.939744 | -0.924809 |
| 77 | 1 | 0 | -5.281581 | -1.083112 | -1.229184 |

Eight BC Free Energy = -2293.027062

|    |    |   |           |           |           |
|----|----|---|-----------|-----------|-----------|
| 1  | 44 | 0 | -0.270202 | -0.088564 | -0.643047 |
| 2  | 17 | 0 | 0.015844  | -2.491899 | -0.923963 |
| 3  | 17 | 0 | -0.646725 | 2.306947  | -0.609465 |
| 4  | 6  | 0 | -1.233357 | -0.166915 | -2.487913 |
| 5  | 1  | 0 | -0.790380 | -1.009675 | -3.014005 |
| 6  | 1  | 0 | -1.176635 | 0.807594  | -2.972111 |
| 7  | 6  | 0 | -1.737005 | -0.469060 | 0.444092  |
| 8  | 1  | 0 | -1.947630 | -1.540655 | 0.598274  |
| 9  | 6  | 0 | -2.349015 | -0.409728 | -1.627252 |
| 10 | 1  | 0 | -2.601290 | -1.466749 | -1.530437 |

|    |   |   |           |           |           |
|----|---|---|-----------|-----------|-----------|
| 11 | 6 | 0 | -2.441642 | 0.454207  | 1.379558  |
| 12 | 1 | 0 | -1.691791 | 0.649068  | 2.158767  |
| 13 | 1 | 0 | -2.594335 | 1.440193  | 0.931035  |
| 14 | 6 | 0 | -3.514884 | 0.557913  | -1.590705 |
| 15 | 1 | 0 | -3.358608 | 1.346334  | -0.848511 |
| 16 | 1 | 0 | -3.546309 | 1.091698  | -2.546165 |
| 17 | 6 | 0 | -3.708648 | -0.079528 | 2.044209  |
| 18 | 1 | 0 | -3.863274 | 0.485811  | 2.971444  |
| 19 | 1 | 0 | -3.544900 | -1.121372 | 2.355763  |
| 20 | 6 | 0 | -4.847152 | -0.153181 | -1.375452 |
| 21 | 1 | 0 | -5.003170 | -0.863863 | -2.197297 |
| 22 | 1 | 0 | -5.655115 | 0.583946  | -1.462394 |
| 23 | 6 | 0 | -4.974607 | 0.005281  | 1.198270  |
| 24 | 1 | 0 | -5.826811 | -0.246694 | 1.838216  |
| 25 | 1 | 0 | -5.135786 | 1.050977  | 0.901622  |
| 26 | 6 | 0 | -4.992874 | -0.892392 | -0.049477 |
| 27 | 1 | 0 | -4.212223 | -1.660434 | 0.035890  |
| 28 | 1 | 0 | -5.932559 | -1.453579 | -0.081022 |
| 29 | 6 | 0 | 1.553157  | 0.077840  | 0.261512  |
| 30 | 7 | 0 | 1.893387  | 0.220059  | 1.553882  |
| 31 | 7 | 0 | 2.680060  | 0.032831  | -0.472508 |
| 32 | 6 | 0 | 3.351415  | 0.132181  | 1.746554  |
| 33 | 1 | 0 | 3.697960  | 0.909434  | 2.432451  |
| 34 | 1 | 0 | 3.613877  | -0.841873 | 2.179688  |
| 35 | 6 | 0 | 3.880787  | 0.296194  | 0.325423  |
| 36 | 1 | 0 | 4.251156  | 1.311480  | 0.127752  |
| 37 | 1 | 0 | 4.676059  | -0.411494 | 0.076979  |
| 38 | 6 | 0 | 2.627742  | -0.016597 | -1.901385 |
| 39 | 6 | 0 | 2.265124  | -0.183682 | -4.658030 |
| 40 | 6 | 0 | 2.802577  | -1.257185 | -2.537341 |
| 41 | 6 | 0 | 2.362984  | 1.157436  | -2.624217 |
| 42 | 6 | 0 | 2.171344  | 1.040668  | -4.002289 |
| 43 | 6 | 0 | 2.606632  | -1.313937 | -3.913203 |
| 44 | 1 | 0 | 1.944276  | 1.937361  | -4.574588 |
| 45 | 1 | 0 | 2.708083  | -2.273134 | -4.415752 |
| 46 | 6 | 0 | 0.978036  | 0.263157  | 2.649876  |
| 47 | 6 | 0 | -0.827494 | 0.380710  | 4.769032  |
| 48 | 6 | 0 | 0.623031  | 1.513508  | 3.170259  |
| 49 | 6 | 0 | 0.468601  | -0.933438 | 3.174159  |
| 50 | 6 | 0 | -0.440770 | -0.845708 | 4.226409  |
| 51 | 6 | 0 | -0.280320 | 1.545887  | 4.233943  |
| 52 | 1 | 0 | -0.857294 | -1.764325 | 4.634191  |
| 53 | 1 | 0 | -0.574860 | 2.510255  | 4.641634  |
| 54 | 6 | 0 | 1.151624  | 2.774379  | 2.563323  |
| 55 | 1 | 0 | 2.241077  | 2.757199  | 2.456483  |
| 56 | 1 | 0 | 0.888563  | 3.642785  | 3.169150  |
| 57 | 1 | 0 | 0.734166  | 2.918376  | 1.559705  |
| 58 | 6 | 0 | 0.874520  | -2.258125 | 2.610741  |
| 59 | 1 | 0 | 0.592330  | -2.360223 | 1.557051  |
| 60 | 1 | 0 | 0.410698  | -3.076541 | 3.163597  |
| 61 | 1 | 0 | 1.959232  | -2.402500 | 2.659046  |
| 62 | 6 | 0 | 2.368938  | 2.509973  | -1.980098 |
| 63 | 1 | 0 | 3.351663  | 2.979255  | -2.110969 |
| 64 | 1 | 0 | 2.145625  | 2.476361  | -0.913313 |
| 65 | 1 | 0 | 1.625279  | 3.167515  | -2.432589 |
| 66 | 6 | 0 | 3.220837  | -2.474546 | -1.773434 |
| 67 | 1 | 0 | 2.833163  | -2.470662 | -0.753758 |
| 68 | 1 | 0 | 4.315127  | -2.540688 | -1.726525 |

|    |   |   |           |           |           |
|----|---|---|-----------|-----------|-----------|
| 69 | 1 | 0 | 2.855911  | -3.382835 | -2.254692 |
| 70 | 6 | 0 | -1.795598 | 0.436340  | 5.911242  |
| 71 | 1 | 0 | -2.229901 | 1.431436  | 6.024818  |
| 72 | 1 | 0 | -1.306573 | 0.184876  | 6.858482  |
| 73 | 1 | 0 | -2.613030 | -0.277311 | 5.779548  |
| 74 | 6 | 0 | 1.986970  | -0.293821 | -6.125670 |
| 75 | 1 | 0 | 2.079094  | 0.670475  | -6.629310 |
| 76 | 1 | 0 | 0.968339  | -0.655719 | -6.303472 |
| 77 | 1 | 0 | 2.662589  | -0.999878 | -6.614429 |

Eight C      Free Energy = -2293.034858

|    |    |   |           |           |           |
|----|----|---|-----------|-----------|-----------|
| 1  | 44 | 0 | -0.145037 | 0.497910  | 0.023415  |
| 2  | 17 | 0 | -0.705370 | 0.633025  | 2.382421  |
| 3  | 17 | 0 | 0.346462  | 0.539422  | -2.342961 |
| 4  | 6  | 0 | -0.943471 | 2.259192  | -0.139453 |
| 5  | 1  | 0 | -1.668080 | 2.539929  | 0.625804  |
| 6  | 1  | 0 | -1.192280 | 2.562483  | -1.158299 |
| 7  | 6  | 0 | 1.539687  | 1.390202  | 0.512241  |
| 8  | 1  | 0 | 1.727997  | 1.300567  | 1.588864  |
| 9  | 6  | 0 | 0.547304  | 2.620260  | 0.261215  |
| 10 | 1  | 0 | 0.422834  | 3.023901  | 1.271871  |
| 11 | 6  | 0 | 2.781654  | 1.153946  | -0.314728 |
| 12 | 1  | 0 | 2.916168  | 0.066547  | -0.347705 |
| 13 | 1  | 0 | 2.639358  | 1.441993  | -1.357873 |
| 14 | 6  | 0 | 1.132915  | 3.649287  | -0.715723 |
| 15 | 1  | 0 | 1.667276  | 3.142441  | -1.523326 |
| 16 | 1  | 0 | 0.319784  | 4.190730  | -1.206458 |
| 17 | 6  | 0 | 4.061129  | 1.766638  | 0.254363  |
| 18 | 1  | 0 | 4.913219  | 1.280436  | -0.236251 |
| 19 | 1  | 0 | 4.144428  | 1.508714  | 1.320418  |
| 20 | 6  | 0 | 2.017190  | 4.666887  | 0.001749  |
| 21 | 1  | 0 | 1.379276  | 5.287551  | 0.644383  |
| 22 | 1  | 0 | 2.431459  | 5.349573  | -0.751184 |
| 23 | 6  | 0 | 4.197073  | 3.276469  | 0.087737  |
| 24 | 1  | 0 | 5.202245  | 3.563420  | 0.415429  |
| 25 | 1  | 0 | 4.158797  | 3.526335  | -0.981861 |
| 26 | 6  | 0 | 3.158642  | 4.112349  | 0.848947  |
| 27 | 1  | 0 | 2.752577  | 3.520764  | 1.680759  |
| 28 | 1  | 0 | 3.654387  | 4.964072  | 1.326579  |
| 29 | 6  | 0 | -0.818834 | -1.400728 | -0.048090 |
| 30 | 7  | 0 | -0.040533 | -2.490253 | 0.059891  |
| 31 | 7  | 0 | -2.098622 | -1.776973 | -0.182172 |
| 32 | 6  | 0 | -0.811271 | -3.732476 | -0.099801 |
| 33 | 1  | 0 | -0.545583 | -4.217548 | -1.046299 |
| 34 | 1  | 0 | -0.584731 | -4.430858 | 0.711050  |
| 35 | 6  | 0 | -2.257294 | -3.235817 | -0.082861 |
| 36 | 1  | 0 | -2.853553 | -3.613592 | -0.918489 |
| 37 | 1  | 0 | -2.778892 | -3.491171 | 0.847002  |
| 38 | 6  | 0 | -3.196276 | -0.857072 | -0.127996 |
| 39 | 6  | 0 | -5.237989 | 1.033783  | -0.028388 |
| 40 | 6  | 0 | -3.804153 | -0.579409 | 1.104753  |
| 41 | 6  | 0 | -3.627888 | -0.261233 | -1.321274 |
| 42 | 6  | 0 | -4.645612 | 0.688598  | -1.241305 |
| 43 | 6  | 0 | -4.816209 | 0.377171  | 1.127211  |
| 44 | 1  | 0 | -4.986461 | 1.166607  | -2.156933 |
| 45 | 1  | 0 | -5.282600 | 0.619412  | 2.079675  |
| 46 | 6  | 0 | 1.389188  | -2.448201 | -0.027109 |

|    |   |   |           |           |           |
|----|---|---|-----------|-----------|-----------|
| 47 | 6 | 0 | 4.171058  | -2.347719 | -0.185644 |
| 48 | 6 | 0 | 2.003042  | -2.546016 | -1.285120 |
| 49 | 6 | 0 | 2.134532  | -2.328158 | 1.155830  |
| 50 | 6 | 0 | 3.523549  | -2.271464 | 1.046895  |
| 51 | 6 | 0 | 3.394856  | -2.486327 | -1.335501 |
| 52 | 1 | 0 | 4.114450  | -2.165784 | 1.954108  |
| 53 | 1 | 0 | 3.883276  | -2.539498 | -2.306031 |
| 54 | 6 | 0 | 1.211514  | -2.738916 | -2.541752 |
| 55 | 1 | 0 | 1.086444  | -3.806159 | -2.763405 |
| 56 | 1 | 0 | 1.723221  | -2.288210 | -3.393332 |
| 57 | 1 | 0 | 0.223244  | -2.278313 | -2.487719 |
| 58 | 6 | 0 | 1.464136  | -2.260534 | 2.491276  |
| 59 | 1 | 0 | 0.927546  | -1.315540 | 2.632521  |
| 60 | 1 | 0 | 2.193129  | -2.360345 | 3.297170  |
| 61 | 1 | 0 | 0.719828  | -3.054222 | 2.609330  |
| 62 | 6 | 0 | -3.026170 | -0.632135 | -2.639860 |
| 63 | 1 | 0 | -2.926626 | -1.716817 | -2.747233 |
| 64 | 1 | 0 | -2.021338 | -0.213081 | -2.763621 |
| 65 | 1 | 0 | -3.644340 | -0.268237 | -3.462571 |
| 66 | 6 | 0 | -3.422534 | -1.304227 | 2.358501  |
| 67 | 1 | 0 | -2.380948 | -1.628674 | 2.349878  |
| 68 | 1 | 0 | -4.060893 | -2.184623 | 2.505083  |
| 69 | 1 | 0 | -3.545052 | -0.661801 | 3.231676  |
| 70 | 6 | 0 | 5.666060  | -2.299605 | -0.271339 |
| 71 | 1 | 0 | 6.001441  | -1.795122 | -1.180556 |
| 72 | 1 | 0 | 6.093818  | -3.307886 | -0.290369 |
| 73 | 1 | 0 | 6.102837  | -1.781510 | 0.585179  |
| 74 | 6 | 0 | -6.297709 | 2.090756  | 0.038710  |
| 75 | 1 | 0 | -5.887488 | 3.034306  | 0.413690  |
| 76 | 1 | 0 | -7.108461 | 1.808454  | 0.715173  |
| 77 | 1 | 0 | -6.730039 | 2.292907  | -0.943195 |

Eight CD      Free Energy = -2293.023542

|    |   |   |           |           |          |
|----|---|---|-----------|-----------|----------|
| 1  | 6 | 0 | -0.390323 | 0.175532  | 1.681809 |
| 2  | 7 | 0 | 0.689302  | 0.235217  | 2.487345 |
| 3  | 7 | 0 | -1.485815 | 0.426839  | 2.419178 |
| 4  | 6 | 0 | 0.354111  | 0.726620  | 3.828517 |
| 5  | 1 | 0 | 0.858761  | 0.137593  | 4.598737 |
| 6  | 1 | 0 | 0.672327  | 1.772604  | 3.936916 |
| 7  | 6 | 0 | -1.162724 | 0.573556  | 3.847359 |
| 8  | 1 | 0 | -1.489597 | -0.317795 | 4.398905 |
| 9  | 1 | 0 | -1.678012 | 1.439460  | 4.270391 |
| 10 | 6 | 0 | -2.829416 | 0.391419  | 1.936781 |
| 11 | 6 | 0 | -5.420581 | 0.325918  | 0.914673 |
| 12 | 6 | 0 | -3.506888 | 1.598075  | 1.728847 |
| 13 | 6 | 0 | -3.430882 | -0.851538 | 1.685554 |
| 14 | 6 | 0 | -4.723505 | -0.856482 | 1.169407 |
| 15 | 6 | 0 | -4.801114 | 1.536900  | 1.211675 |
| 16 | 1 | 0 | -5.201095 | -1.812660 | 0.965601 |
| 17 | 1 | 0 | -5.334644 | 2.467082  | 1.029675 |
| 18 | 6 | 0 | 2.025120  | 0.103026  | 1.989837 |
| 19 | 6 | 0 | 4.589442  | -0.248311 | 0.953466 |
| 20 | 6 | 0 | 2.647619  | -1.153003 | 2.112492 |
| 21 | 6 | 0 | 2.683232  | 1.201977  | 1.420447 |
| 22 | 6 | 0 | 3.963875  | 0.991655  | 0.897070 |
| 23 | 6 | 0 | 3.922069  | -1.304431 | 1.581852 |
| 24 | 1 | 0 | 4.481623  | 1.829905  | 0.435485 |



|    |    |   |           |           |           |
|----|----|---|-----------|-----------|-----------|
| 25 | 1  | 0 | 4.405640  | -2.276135 | 1.650225  |
| 26 | 6  | 0 | 1.951059  | -2.283253 | 2.800262  |
| 27 | 1  | 0 | 1.703043  | -2.029953 | 3.836792  |
| 28 | 1  | 0 | 2.577898  | -3.175899 | 2.815814  |
| 29 | 1  | 0 | 1.019334  | -2.535637 | 2.286375  |
| 30 | 6  | 0 | 2.099163  | 2.581192  | 1.417107  |
| 31 | 1  | 0 | 1.039279  | 2.597157  | 1.667324  |
| 32 | 1  | 0 | 2.188065  | 3.050941  | 0.434971  |
| 33 | 1  | 0 | 2.635002  | 3.216351  | 2.131811  |
| 34 | 6  | 0 | -2.700987 | -2.129433 | 1.955028  |
| 35 | 1  | 0 | -2.247136 | -2.135124 | 2.951671  |
| 36 | 1  | 0 | -1.882994 | -2.292905 | 1.244109  |
| 37 | 1  | 0 | -3.375299 | -2.985121 | 1.890953  |
| 38 | 6  | 0 | -2.878029 | 2.914051  | 2.064289  |
| 39 | 1  | 0 | -1.811193 | 2.918224  | 1.832062  |
| 40 | 1  | 0 | -3.000969 | 3.151858  | 3.128245  |
| 41 | 1  | 0 | -3.340996 | 3.723836  | 1.498305  |
| 42 | 6  | 0 | 5.935469  | -0.464188 | 0.332742  |
| 43 | 1  | 0 | 6.610038  | -1.000832 | 1.005329  |
| 44 | 1  | 0 | 6.411117  | 0.478883  | 0.057024  |
| 45 | 1  | 0 | 5.852560  | -1.069129 | -0.576781 |
| 46 | 6  | 0 | -6.799632 | 0.285168  | 0.330202  |
| 47 | 1  | 0 | -7.439797 | -0.427481 | 0.857636  |
| 48 | 1  | 0 | -6.776272 | -0.029444 | -0.718168 |
| 49 | 1  | 0 | -7.282914 | 1.263195  | 0.366923  |
| 50 | 44 | 0 | -0.175264 | -0.051006 | -0.316738 |
| 51 | 17 | 0 | 0.220636  | -2.445185 | -0.196282 |
| 52 | 17 | 0 | -0.616219 | 2.322641  | -0.590032 |
| 53 | 6  | 0 | -1.753715 | -0.374208 | -1.180998 |
| 54 | 1  | 0 | -2.435337 | 0.434374  | -1.475856 |
| 55 | 1  | 0 | -2.071576 | -1.403023 | -1.394241 |
| 56 | 6  | 0 | 1.135955  | 0.175762  | -2.051214 |
| 57 | 1  | 0 | 1.373610  | 1.236503  | -1.938328 |
| 58 | 6  | 0 | -0.088206 | -0.092110 | -2.699530 |
| 59 | 1  | 0 | -0.657076 | 0.790558  | -2.992498 |
| 60 | 6  | 0 | -0.269097 | -1.324835 | -3.538059 |
| 61 | 1  | 0 | -1.310609 | -1.655098 | -3.551958 |
| 62 | 1  | 0 | 0.304403  | -2.150906 | -3.108319 |
| 63 | 6  | 0 | 2.319922  | -0.755667 | -2.041728 |
| 64 | 1  | 0 | 2.884951  | -0.574660 | -1.120561 |
| 65 | 1  | 0 | 2.000600  | -1.797991 | -1.985654 |
| 66 | 6  | 0 | 0.163778  | -1.037426 | -4.983879 |
| 67 | 1  | 0 | 0.149414  | -1.987171 | -5.532338 |
| 68 | 1  | 0 | -0.596699 | -0.406101 | -5.460536 |
| 69 | 6  | 0 | 3.251792  | -0.559028 | -3.241723 |
| 70 | 1  | 0 | 4.203183  | -1.052318 | -3.009757 |
| 71 | 1  | 0 | 3.490034  | 0.507754  | -3.360076 |
| 72 | 6  | 0 | 1.524641  | -0.368470 | -5.168486 |
| 73 | 1  | 0 | 1.493177  | 0.653656  | -4.768305 |
| 74 | 1  | 0 | 1.676509  | -0.244618 | -6.246016 |
| 75 | 6  | 0 | 2.729142  | -1.109372 | -4.567892 |
| 76 | 1  | 0 | 3.555366  | -1.082310 | -5.286617 |
| 77 | 1  | 0 | 2.487997  | -2.174642 | -4.445223 |

Eight D Free Energy = -2293.028660

|   |   |   |           |          |          |
|---|---|---|-----------|----------|----------|
| 1 | 6 | 0 | -0.459742 | 0.239305 | 1.581207 |
| 2 | 7 | 0 | 0.611741  | 0.247075 | 2.408524 |

|    |    |   |           |           |           |
|----|----|---|-----------|-----------|-----------|
| 3  | 7  | 0 | -1.563735 | 0.457758  | 2.328652  |
| 4  | 6  | 0 | 0.262569  | 0.670015  | 3.766159  |
| 5  | 1  | 0 | 0.774569  | 0.056998  | 4.512461  |
| 6  | 1  | 0 | 0.555713  | 1.717284  | 3.924688  |
| 7  | 6  | 0 | -1.247974 | 0.484366  | 3.765376  |
| 8  | 1  | 0 | -1.552762 | -0.461441 | 4.233717  |
| 9  | 1  | 0 | -1.785054 | 1.294516  | 4.264385  |
| 10 | 6  | 0 | -2.912972 | 0.357117  | 1.876011  |
| 11 | 6  | 0 | -5.545885 | 0.179241  | 0.983628  |
| 12 | 6  | 0 | -3.643443 | 1.536901  | 1.675801  |
| 13 | 6  | 0 | -3.475136 | -0.909686 | 1.666569  |
| 14 | 6  | 0 | -4.792453 | -0.970277 | 1.211585  |
| 15 | 6  | 0 | -4.956655 | 1.420984  | 1.228123  |
| 16 | 1  | 0 | -5.239527 | -1.945529 | 1.033029  |
| 17 | 1  | 0 | -5.533040 | 2.327381  | 1.056207  |
| 18 | 6  | 0 | 1.951900  | 0.116339  | 1.926422  |
| 19 | 6  | 0 | 4.532184  | -0.229308 | 0.926527  |
| 20 | 6  | 0 | 2.553524  | -1.152684 | 2.005126  |
| 21 | 6  | 0 | 2.641650  | 1.231343  | 1.425935  |
| 22 | 6  | 0 | 3.926119  | 1.023021  | 0.914172  |
| 23 | 6  | 0 | 3.837549  | -1.300497 | 1.494166  |
| 24 | 1  | 0 | 4.468884  | 1.874851  | 0.509203  |
| 25 | 1  | 0 | 4.307587  | -2.280354 | 1.533985  |
| 26 | 6  | 0 | 1.833688  | -2.299054 | 2.640197  |
| 27 | 1  | 0 | 1.606024  | -2.094509 | 3.692365  |
| 28 | 1  | 0 | 2.436139  | -3.207685 | 2.600935  |
| 29 | 1  | 0 | 0.889606  | -2.501123 | 2.128207  |
| 30 | 6  | 0 | 2.090175  | 2.621264  | 1.507646  |
| 31 | 1  | 0 | 1.017044  | 2.644867  | 1.693991  |
| 32 | 1  | 0 | 2.252579  | 3.171273  | 0.578115  |
| 33 | 1  | 0 | 2.594989  | 3.174212  | 2.308340  |
| 34 | 6  | 0 | -2.677809 | -2.154375 | 1.897167  |
| 35 | 1  | 0 | -2.222247 | -2.168428 | 2.893047  |
| 36 | 1  | 0 | -1.855236 | -2.248301 | 1.178506  |
| 37 | 1  | 0 | -3.304259 | -3.043233 | 1.806897  |
| 38 | 6  | 0 | -3.010476 | 2.873805  | 1.897231  |
| 39 | 1  | 0 | -2.182218 | 3.029626  | 1.197062  |
| 40 | 1  | 0 | -2.595510 | 2.968207  | 2.906327  |
| 41 | 1  | 0 | -3.734195 | 3.678540  | 1.758742  |
| 42 | 6  | 0 | 5.886706  | -0.432172 | 0.319967  |
| 43 | 1  | 0 | 6.441740  | -1.226420 | 0.823646  |
| 44 | 1  | 0 | 6.487205  | 0.479151  | 0.354268  |
| 45 | 1  | 0 | 5.802489  | -0.721276 | -0.733967 |
| 46 | 6  | 0 | -6.966411 | 0.089387  | 0.515211  |
| 47 | 1  | 0 | -7.191227 | -0.891848 | 0.092937  |
| 48 | 1  | 0 | -7.188625 | 0.843638  | -0.243737 |
| 49 | 1  | 0 | -7.666670 | 0.256408  | 1.340619  |
| 50 | 44 | 0 | -0.158266 | 0.077559  | -0.370429 |
| 51 | 17 | 0 | 0.181288  | -2.317544 | -0.391162 |
| 52 | 17 | 0 | -0.433621 | 2.469639  | -0.654929 |
| 53 | 6  | 0 | -1.876304 | -0.163997 | -0.876011 |
| 54 | 1  | 0 | -2.580443 | 0.672911  | -0.988833 |
| 55 | 1  | 0 | -2.255831 | -1.163861 | -1.137532 |
| 56 | 6  | 0 | 1.426612  | 0.266596  | -2.246062 |
| 57 | 1  | 0 | 1.686593  | 1.260052  | -1.871637 |
| 58 | 6  | 0 | 0.243531  | 0.152810  | -2.911120 |
| 59 | 1  | 0 | -0.370054 | 1.047996  | -3.005393 |
| 60 | 6  | 0 | -0.124209 | -1.044261 | -3.722801 |

|    |   |   |           |           |           |
|----|---|---|-----------|-----------|-----------|
| 61 | 1 | 0 | -1.201839 | -1.227587 | -3.680833 |
| 62 | 1 | 0 | 0.351589  | -1.935071 | -3.301062 |
| 63 | 6 | 0 | 2.509987  | -0.771954 | -2.221841 |
| 64 | 1 | 0 | 3.110955  | -0.625520 | -1.318817 |
| 65 | 1 | 0 | 2.080912  | -1.773415 | -2.132050 |
| 66 | 6 | 0 | 0.295637  | -0.853406 | -5.189174 |
| 67 | 1 | 0 | 0.130860  | -1.803554 | -5.711695 |
| 68 | 1 | 0 | -0.375463 | -0.128551 | -5.666108 |
| 69 | 6 | 0 | 3.426258  | -0.719253 | -3.451513 |
| 70 | 1 | 0 | 4.322514  | -1.306360 | -3.218912 |
| 71 | 1 | 0 | 3.777909  | 0.309218  | -3.614059 |
| 72 | 6 | 0 | 1.736658  | -0.395475 | -5.408022 |
| 73 | 1 | 0 | 1.849894  | 0.643401  | -5.072154 |
| 74 | 1 | 0 | 1.904514  | -0.363542 | -6.489875 |
| 75 | 6 | 0 | 2.826041  | -1.258238 | -4.751354 |
| 76 | 1 | 0 | 3.650561  | -1.381710 | -5.461895 |
| 77 | 1 | 0 | 2.442939  | -2.273203 | -4.576840 |

## Z-Cyclononene formation

Nine A Free Energy = -2332.319111

|    |    |   |           |           |           |
|----|----|---|-----------|-----------|-----------|
| 1  | 6  | 0 | -0.929380 | -2.120698 | 0.071709  |
| 2  | 7  | 0 | -2.085963 | -2.721880 | 0.470220  |
| 3  | 7  | 0 | 0.089191  | -2.954486 | 0.412685  |
| 4  | 6  | 0 | -1.878963 | -4.067032 | 1.000588  |
| 5  | 1  | 0 | -2.427010 | -4.201569 | 1.938276  |
| 6  | 1  | 0 | -2.244314 | -4.818423 | 0.287574  |
| 7  | 6  | 0 | -0.366815 | -4.119400 | 1.176974  |
| 8  | 1  | 0 | -0.062429 | -4.026707 | 2.228266  |
| 9  | 1  | 0 | 0.082289  | -5.036581 | 0.784380  |
| 10 | 6  | 0 | 1.479025  | -2.659363 | 0.324533  |
| 11 | 6  | 0 | 4.183799  | -2.034713 | 0.094786  |
| 12 | 6  | 0 | 2.182250  | -3.095248 | -0.802371 |
| 13 | 6  | 0 | 2.089339  | -1.905589 | 1.335776  |
| 14 | 6  | 0 | 3.443418  | -1.608783 | 1.199093  |
| 15 | 6  | 0 | 3.536090  | -2.773132 | -0.895263 |
| 16 | 1  | 0 | 3.929392  | -1.012897 | 1.968855  |
| 17 | 1  | 0 | 4.093847  | -3.093133 | -1.772299 |
| 18 | 6  | 0 | -3.392303 | -2.189671 | 0.243610  |
| 19 | 6  | 0 | -5.906514 | -1.072796 | -0.213426 |
| 20 | 6  | 0 | -3.987082 | -1.409181 | 1.248430  |
| 21 | 6  | 0 | -4.073064 | -2.502100 | -0.944464 |
| 22 | 6  | 0 | -5.321674 | -1.919909 | -1.153009 |
| 23 | 6  | 0 | -5.235758 | -0.850390 | 0.987705  |
| 24 | 1  | 0 | -5.849582 | -2.134963 | -2.079438 |
| 25 | 1  | 0 | -5.696006 | -0.222501 | 1.747298  |
| 26 | 6  | 0 | -3.352923 | -1.227365 | 2.593744  |
| 27 | 1  | 0 | -3.781692 | -1.938703 | 3.310358  |
| 28 | 1  | 0 | -3.534570 | -0.223723 | 2.981367  |
| 29 | 1  | 0 | -2.273176 | -1.376997 | 2.573086  |
| 30 | 6  | 0 | -3.532074 | -3.491756 | -1.930666 |
| 31 | 1  | 0 | -2.445321 | -3.573463 | -1.892365 |
| 32 | 1  | 0 | -3.796941 | -3.215883 | -2.952317 |
| 33 | 1  | 0 | -3.956997 | -4.484840 | -1.738657 |
| 34 | 6  | 0 | 1.288160  | -1.358870 | 2.475364  |
| 35 | 1  | 0 | 0.721594  | -2.136226 | 2.997482  |
| 36 | 1  | 0 | 0.555105  | -0.622887 | 2.123207  |
| 37 | 1  | 0 | 1.930208  | -0.867796 | 3.208367  |
| 38 | 6  | 0 | 1.466235  | -3.801776 | -1.911506 |
| 39 | 1  | 0 | 0.701619  | -3.152913 | -2.355004 |
| 40 | 1  | 0 | 0.946777  | -4.699365 | -1.561045 |
| 41 | 1  | 0 | 2.156838  | -4.101134 | -2.701319 |
| 42 | 6  | 0 | -7.218769 | -0.407351 | -0.493022 |
| 43 | 1  | 0 | -7.783123 | -0.222303 | 0.423645  |
| 44 | 1  | 0 | -7.841492 | -1.004106 | -1.162921 |
| 45 | 1  | 0 | -7.067077 | 0.563314  | -0.976980 |
| 46 | 6  | 0 | 5.642076  | -1.709396 | -0.015461 |
| 47 | 1  | 0 | 5.850060  | -0.683383 | 0.298747  |
| 48 | 1  | 0 | 6.007223  | -1.831489 | -1.036868 |
| 49 | 1  | 0 | 6.242561  | -2.363812 | 0.625104  |
| 50 | 44 | 0 | -0.948011 | -0.411757 | -0.817662 |
| 51 | 17 | 0 | -1.452778 | 0.932291  | 1.029765  |
| 52 | 17 | 0 | -1.524282 | -1.120985 | -2.960033 |
| 53 | 6  | 0 | 0.786857  | 0.018076  | -1.058299 |
| 54 | 1  | 0 | 1.664593  | -0.618557 | -0.912518 |

|    |   |   |          |          |           |
|----|---|---|----------|----------|-----------|
| 55 | 6 | 0 | 6.343338 | 9.218529 | 1.602544  |
| 56 | 1 | 0 | 6.814068 | 9.734225 | 2.432313  |
| 57 | 1 | 0 | 6.910369 | 9.168291 | 0.676372  |
| 58 | 6 | 0 | 5.133931 | 8.677415 | 1.703590  |
| 59 | 1 | 0 | 4.602279 | 8.748205 | 2.654182  |
| 60 | 6 | 0 | 4.422469 | 7.941931 | 0.617399  |
| 61 | 6 | 0 | 1.060729 | 1.417282 | -1.492736 |
| 62 | 1 | 0 | 1.612332 | 1.401193 | -2.445343 |
| 63 | 1 | 0 | 0.129912 | 1.970934 | -1.688108 |
| 64 | 6 | 0 | 4.087874 | 6.499397 | 0.992798  |
| 65 | 1 | 0 | 3.511176 | 6.491124 | 1.927884  |
| 66 | 1 | 0 | 5.017802 | 5.959965 | 1.216483  |
| 67 | 6 | 0 | 1.878067 | 2.148853 | -0.421364 |
| 68 | 1 | 0 | 2.810820 | 1.594568 | -0.245729 |
| 69 | 1 | 0 | 1.322290 | 2.116687 | 0.524564  |
| 70 | 6 | 0 | 3.311919 | 5.762368 | -0.087215 |
| 71 | 1 | 0 | 3.883289 | 5.781466 | -1.025944 |
| 72 | 1 | 0 | 2.380332 | 6.304833 | -0.301256 |
| 73 | 6 | 0 | 2.190316 | 3.590254 | -0.791360 |
| 74 | 1 | 0 | 2.740768 | 3.615592 | -1.742443 |
| 75 | 1 | 0 | 1.250761 | 4.127568 | -0.979218 |
| 76 | 6 | 0 | 2.985925 | 4.322375 | 0.277886  |
| 77 | 1 | 0 | 2.426343 | 4.302304 | 1.223176  |
| 78 | 1 | 0 | 3.919037 | 3.776814 | 0.478076  |
| 79 | 1 | 0 | 5.025424 | 7.959172 | -0.298846 |
| 80 | 1 | 0 | 3.485722 | 8.464596 | 0.374619  |

Nine B Free Energy = -2332.320302

|    |   |   |           |           |           |
|----|---|---|-----------|-----------|-----------|
| 1  | 6 | 0 | -0.175125 | -1.703242 | 0.354309  |
| 2  | 7 | 0 | -1.305786 | -2.424915 | 0.571368  |
| 3  | 7 | 0 | 0.868578  | -2.560036 | 0.383020  |
| 4  | 6 | 0 | -1.064671 | -3.865117 | 0.580007  |
| 5  | 1 | 0 | -1.601110 | -4.346769 | 1.402465  |
| 6  | 1 | 0 | -1.405421 | -4.319849 | -0.360646 |
| 7  | 6 | 0 | 0.452353  | -3.924579 | 0.737236  |
| 8  | 1 | 0 | 0.753793  | -4.157556 | 1.766685  |
| 9  | 1 | 0 | 0.928340  | -4.653825 | 0.076107  |
| 10 | 6 | 0 | 2.247746  | -2.221764 | 0.256166  |
| 11 | 6 | 0 | 4.954438  | -1.614705 | -0.004813 |
| 12 | 6 | 0 | 2.824493  | -2.225798 | -1.020160 |
| 13 | 6 | 0 | 2.989635  | -1.914897 | 1.405254  |
| 14 | 6 | 0 | 4.339688  | -1.610149 | 1.248462  |
| 15 | 6 | 0 | 4.181343  | -1.921106 | -1.123992 |
| 16 | 1 | 0 | 4.924905  | -1.354892 | 2.128913  |
| 17 | 1 | 0 | 4.643010  | -1.915224 | -2.109080 |
| 18 | 6 | 0 | -2.590804 | -1.804526 | 0.460795  |
| 19 | 6 | 0 | -4.957494 | -0.348075 | 0.228919  |
| 20 | 6 | 0 | -3.238405 | -1.363861 | 1.628413  |
| 21 | 6 | 0 | -3.166813 | -1.632249 | -0.811014 |
| 22 | 6 | 0 | -4.340577 | -0.885239 | -0.899170 |
| 23 | 6 | 0 | -4.411045 | -0.626044 | 1.481667  |
| 24 | 1 | 0 | -4.778812 | -0.717661 | -1.880370 |
| 25 | 1 | 0 | -4.905679 | -0.250773 | 2.374943  |
| 26 | 6 | 0 | -2.736042 | -1.717315 | 2.992999  |
| 27 | 1 | 0 | -3.300762 | -2.571828 | 3.386309  |
| 28 | 1 | 0 | -2.863731 | -0.886966 | 3.688895  |
| 29 | 1 | 0 | -1.677979 | -1.977006 | 2.990157  |

|    |    |   |           |           |           |
|----|----|---|-----------|-----------|-----------|
| 30 | 6  | 0 | -2.603561 | -2.297588 | -2.028573 |
| 31 | 1  | 0 | -1.523169 | -2.434951 | -1.972683 |
| 32 | 1  | 0 | -2.800426 | -1.710037 | -2.925543 |
| 33 | 1  | 0 | -3.069872 | -3.281957 | -2.161488 |
| 34 | 6  | 0 | 2.327349  | -1.854476 | 2.745946  |
| 35 | 1  | 0 | 1.951930  | -2.833699 | 3.062097  |
| 36 | 1  | 0 | 1.466495  | -1.173828 | 2.739072  |
| 37 | 1  | 0 | 3.023171  | -1.510311 | 3.512701  |
| 38 | 6  | 0 | 1.992604  | -2.502544 | -2.231023 |
| 39 | 1  | 0 | 1.270926  | -1.694254 | -2.404002 |
| 40 | 1  | 0 | 1.406851  | -3.421527 | -2.122633 |
| 41 | 1  | 0 | 2.613639  | -2.600921 | -3.122880 |
| 42 | 6  | 0 | -6.164224 | 0.529016  | 0.099515  |
| 43 | 1  | 0 | -6.823114 | 0.444429  | 0.966532  |
| 44 | 1  | 0 | -6.744246 | 0.294304  | -0.795431 |
| 45 | 1  | 0 | -5.870138 | 1.582232  | 0.024101  |
| 46 | 6  | 0 | 6.417021  | -1.318738 | -0.139739 |
| 47 | 1  | 0 | 6.751444  | -0.586959 | 0.599212  |
| 48 | 1  | 0 | 6.662553  | -0.936066 | -1.132652 |
| 49 | 1  | 0 | 7.017455  | -2.222109 | 0.013611  |
| 50 | 44 | 0 | -0.407029 | 0.226473  | 0.075762  |
| 51 | 17 | 0 | -0.519907 | 0.637126  | 2.466611  |
| 52 | 17 | 0 | -0.553175 | 0.175235  | -2.341894 |
| 53 | 6  | 0 | 1.375271  | 0.637114  | 0.124953  |
| 54 | 1  | 0 | 1.883401  | 0.461842  | 1.089741  |
| 55 | 6  | 0 | -2.085698 | 1.986697  | -0.111054 |
| 56 | 1  | 0 | -2.493882 | 1.630731  | 0.833661  |
| 57 | 1  | 0 | -2.627001 | 1.743291  | -1.022805 |
| 58 | 6  | 0 | -1.036064 | 2.839429  | -0.140361 |
| 59 | 1  | 0 | -0.565161 | 3.097139  | 0.809788  |
| 60 | 6  | 0 | -0.534486 | 3.496642  | -1.387683 |
| 61 | 1  | 0 | -1.275150 | 3.349643  | -2.180120 |
| 62 | 1  | 0 | 0.344685  | 2.951817  | -1.741076 |
| 63 | 6  | 0 | 2.225726  | 1.365982  | -0.853210 |
| 64 | 1  | 0 | 3.161409  | 0.806792  | -1.000847 |
| 65 | 1  | 0 | 1.738184  | 1.443000  | -1.828412 |
| 66 | 6  | 0 | -0.220704 | 4.993225  | -1.250188 |
| 67 | 1  | 0 | -1.139997 | 5.505275  | -0.941024 |
| 68 | 1  | 0 | 0.007836  | 5.382254  | -2.251003 |
| 69 | 6  | 0 | 2.519342  | 2.762803  | -0.263907 |
| 70 | 1  | 0 | 3.365543  | 2.708283  | 0.430019  |
| 71 | 1  | 0 | 1.666208  | 3.042576  | 0.362582  |
| 72 | 6  | 0 | 0.905074  | 5.393015  | -0.292424 |
| 73 | 1  | 0 | 0.792834  | 4.856660  | 0.657650  |
| 74 | 1  | 0 | 0.766127  | 6.447190  | -0.027433 |
| 75 | 6  | 0 | 2.742978  | 3.856639  | -1.307716 |
| 76 | 1  | 0 | 3.792971  | 3.873986  | -1.621969 |
| 77 | 1  | 0 | 2.180371  | 3.614455  | -2.217151 |
| 78 | 6  | 0 | 2.337527  | 5.246775  | -0.818019 |
| 79 | 1  | 0 | 3.024654  | 5.565974  | -0.023480 |
| 80 | 1  | 0 | 2.485183  | 5.960566  | -1.638409 |

Nine BC Free Energy = -2332.310518

|   |   |   |           |           |          |
|---|---|---|-----------|-----------|----------|
| 1 | 6 | 0 | 0.303881  | -3.167296 | 1.961360 |
| 2 | 1 | 0 | 1.077795  | -3.819453 | 1.544974 |
| 3 | 1 | 0 | -0.554767 | -3.312420 | 1.304204 |
| 4 | 6 | 0 | -2.136094 | -1.429063 | 0.880430 |

|    |   |   |           |           |           |
|----|---|---|-----------|-----------|-----------|
| 5  | 1 | 0 | -1.854754 | -2.292011 | 0.269828  |
| 6  | 1 | 0 | -2.614551 | -0.762593 | 0.148961  |
| 7  | 6 | 0 | -0.006141 | -3.608373 | 3.393995  |
| 8  | 1 | 0 | 0.925985  | -3.545709 | 3.968725  |
| 9  | 1 | 0 | -0.275171 | -4.672239 | 3.387768  |
| 10 | 6 | 0 | -3.175358 | -1.790065 | 1.951919  |
| 11 | 1 | 0 | -4.161748 | -1.660093 | 1.494635  |
| 12 | 1 | 0 | -3.139871 | -1.049142 | 2.763320  |
| 13 | 6 | 0 | -1.090907 | -2.815765 | 4.130272  |
| 14 | 1 | 0 | -1.032756 | -1.752663 | 3.860173  |
| 15 | 1 | 0 | -0.871766 | -2.840773 | 5.203336  |
| 16 | 6 | 0 | -3.095019 | -3.213118 | 2.531038  |
| 17 | 1 | 0 | -4.103462 | -3.640387 | 2.558936  |
| 18 | 1 | 0 | -2.536932 | -3.860632 | 1.843927  |
| 19 | 6 | 0 | -2.518114 | -3.314507 | 3.938794  |
| 20 | 1 | 0 | -3.173923 | -2.754931 | 4.618922  |
| 21 | 1 | 0 | -2.573910 | -4.359658 | 4.270430  |
| 22 | 6 | 0 | 0.282439  | 1.309071  | -1.135961 |
| 23 | 7 | 0 | -0.822881 | 1.885311  | -1.634646 |
| 24 | 7 | 0 | 1.361213  | 1.911715  | -1.674571 |
| 25 | 6 | 0 | -0.499023 | 3.041336  | -2.487125 |
| 26 | 1 | 0 | -1.098381 | 3.027389  | -3.401049 |
| 27 | 1 | 0 | -0.720225 | 3.974569  | -1.953071 |
| 28 | 6 | 0 | 0.995010  | 2.855101  | -2.736298 |
| 29 | 1 | 0 | 1.204033  | 2.416713  | -3.721707 |
| 30 | 1 | 0 | 1.566765  | 3.782693  | -2.648153 |
| 31 | 6 | 0 | 2.664502  | 1.342426  | -1.498579 |
| 32 | 6 | 0 | 5.094918  | 0.079467  | -0.982955 |
| 33 | 6 | 0 | 3.544069  | 1.915045  | -0.566100 |
| 34 | 6 | 0 | 3.014577  | 0.203792  | -2.244889 |
| 35 | 6 | 0 | 4.228774  | -0.416731 | -1.954680 |
| 36 | 6 | 0 | 4.747653  | 1.256803  | -0.321744 |
| 37 | 1 | 0 | 4.501894  | -1.312647 | -2.507522 |
| 38 | 1 | 0 | 5.428158  | 1.674176  | 0.417051  |
| 39 | 6 | 0 | -2.161836 | 1.554777  | -1.258691 |
| 40 | 6 | 0 | -4.761483 | 0.864915  | -0.530018 |
| 41 | 6 | 0 | -2.884740 | 0.674015  | -2.074122 |
| 42 | 6 | 0 | -2.710576 | 2.112085  | -0.096190 |
| 43 | 6 | 0 | -4.009286 | 1.741019  | 0.252065  |
| 44 | 6 | 0 | -4.185273 | 0.347258  | -1.690109 |
| 45 | 1 | 0 | -4.444051 | 2.152169  | 1.160621  |
| 46 | 1 | 0 | -4.754324 | -0.344769 | -2.306847 |
| 47 | 6 | 0 | -2.255035 | 0.055868  | -3.281823 |
| 48 | 1 | 0 | -1.790470 | 0.801634  | -3.934900 |
| 49 | 1 | 0 | -2.991102 | -0.493152 | -3.871371 |
| 50 | 1 | 0 | -1.466289 | -0.645390 | -2.982963 |
| 51 | 6 | 0 | -1.921198 | 3.054116  | 0.755844  |
| 52 | 1 | 0 | -1.067739 | 2.558236  | 1.232572  |
| 53 | 1 | 0 | -2.543392 | 3.485482  | 1.541704  |
| 54 | 1 | 0 | -1.506780 | 3.880576  | 0.169391  |
| 55 | 6 | 0 | 2.173837  | -0.294768 | -3.380184 |
| 56 | 1 | 0 | 2.512987  | 0.156649  | -4.321006 |
| 57 | 1 | 0 | 1.113384  | -0.072133 | -3.257913 |
| 58 | 1 | 0 | 2.255086  | -1.377204 | -3.484052 |
| 59 | 6 | 0 | 3.242341  | 3.212393  | 0.116463  |
| 60 | 1 | 0 | 2.176676  | 3.439751  | 0.118487  |
| 61 | 1 | 0 | 3.771970  | 4.032772  | -0.383217 |
| 62 | 1 | 0 | 3.568737  | 3.193063  | 1.157325  |

|    |    |   |           |           |           |
|----|----|---|-----------|-----------|-----------|
| 63 | 6  | 0 | -6.163233 | 0.502183  | -0.143231 |
| 64 | 1  | 0 | -6.311508 | 0.564178  | 0.937177  |
| 65 | 1  | 0 | -6.421217 | -0.509914 | -0.463906 |
| 66 | 1  | 0 | -6.889391 | 1.178578  | -0.606737 |
| 67 | 6  | 0 | 6.360556  | -0.644434 | -0.639443 |
| 68 | 1  | 0 | 6.212668  | -1.296615 | 0.228453  |
| 69 | 1  | 0 | 7.166059  | 0.047295  | -0.381964 |
| 70 | 1  | 0 | 6.702488  | -1.276132 | -1.461707 |
| 71 | 17 | 0 | 0.158755  | -1.962061 | -1.366289 |
| 72 | 44 | 0 | 0.529855  | -0.180755 | 0.239223  |
| 73 | 6  | 0 | 1.958187  | -1.387787 | 1.153021  |
| 74 | 1  | 0 | 2.685327  | -0.705186 | 1.586648  |
| 75 | 1  | 0 | 2.326277  | -2.124407 | 0.439837  |
| 76 | 6  | 0 | -0.934374 | -0.648620 | 1.298716  |
| 77 | 1  | 0 | -1.048971 | -0.080634 | 2.237391  |
| 78 | 6  | 0 | 0.809467  | -1.736927 | 1.929937  |
| 79 | 1  | 0 | 0.752540  | -1.192221 | 2.872610  |
| 80 | 17 | 0 | 1.110679  | 1.461560  | 1.941091  |

Nine C Free Energy = -2332.320467

|    |   |   |           |           |           |
|----|---|---|-----------|-----------|-----------|
| 1  | 6 | 0 | 0.068793  | -3.304046 | 1.860887  |
| 2  | 1 | 0 | 0.860997  | -3.896149 | 1.395015  |
| 3  | 1 | 0 | -0.828773 | -3.522050 | 1.281151  |
| 4  | 6 | 0 | -2.224858 | -1.429779 | 1.128694  |
| 5  | 1 | 0 | -2.127799 | -2.274183 | 0.443358  |
| 6  | 1 | 0 | -2.662569 | -0.635745 | 0.513031  |
| 7  | 6 | 0 | -0.064302 | -3.744963 | 3.320629  |
| 8  | 1 | 0 | 0.931656  | -3.670061 | 3.775232  |
| 9  | 1 | 0 | -0.316337 | -4.813301 | 3.344087  |
| 10 | 6 | 0 | -3.224181 | -1.752842 | 2.250705  |
| 11 | 1 | 0 | -4.222346 | -1.541162 | 1.852150  |
| 12 | 1 | 0 | -3.093900 | -1.047483 | 3.084220  |
| 13 | 6 | 0 | -1.050170 | -2.973245 | 4.200871  |
| 14 | 1 | 0 | -0.970256 | -1.895490 | 4.003336  |
| 15 | 1 | 0 | -0.734740 | -3.087110 | 5.244121  |
| 16 | 6 | 0 | -3.209339 | -3.198026 | 2.774059  |
| 17 | 1 | 0 | -4.242979 | -3.542933 | 2.890612  |
| 18 | 1 | 0 | -2.779705 | -3.858864 | 2.011285  |
| 19 | 6 | 0 | -2.509039 | -3.405567 | 4.112469  |
| 20 | 1 | 0 | -3.072970 | -2.861228 | 4.881583  |
| 21 | 1 | 0 | -2.581125 | -4.465354 | 4.390539  |
| 22 | 6 | 0 | 0.379002  | 1.194081  | -1.243661 |
| 23 | 7 | 0 | -0.696082 | 1.897040  | -1.631617 |
| 24 | 7 | 0 | 1.455674  | 1.608369  | -1.926914 |
| 25 | 6 | 0 | -0.378250 | 2.853626  | -2.701917 |
| 26 | 1 | 0 | -0.912591 | 2.580464  | -3.618478 |
| 27 | 1 | 0 | -0.694977 | 3.862227  | -2.417596 |
| 28 | 6 | 0 | 1.140068  | 2.715376  | -2.842015 |
| 29 | 1 | 0 | 1.456945  | 2.468362  | -3.860100 |
| 30 | 1 | 0 | 1.675765  | 3.619599  | -2.534183 |
| 31 | 6 | 0 | 2.794523  | 1.218041  | -1.594551 |
| 32 | 6 | 0 | 5.340393  | 0.377877  | -0.842837 |
| 33 | 6 | 0 | 3.531778  | 2.004487  | -0.696425 |
| 34 | 6 | 0 | 3.320155  | 0.053149  | -2.167296 |
| 35 | 6 | 0 | 4.594474  | -0.349365 | -1.766697 |
| 36 | 6 | 0 | 4.798340  | 1.557956  | -0.332572 |
| 37 | 1 | 0 | 5.013129  | -1.257509 | -2.194501 |



|    |    |   |           |           |           |
|----|----|---|-----------|-----------|-----------|
| 38 | 1  | 0 | 5.372554  | 2.144212  | 0.381481  |
| 39 | 6  | 0 | -2.035887 | 1.593312  | -1.227248 |
| 40 | 6  | 0 | -4.631162 | 0.985905  | -0.407455 |
| 41 | 6  | 0 | -2.821352 | 0.748976  | -2.025690 |
| 42 | 6  | 0 | -2.529535 | 2.168699  | -0.046028 |
| 43 | 6  | 0 | -3.826804 | 1.840573  | 0.346001  |
| 44 | 6  | 0 | -4.112443 | 0.456392  | -1.588328 |
| 45 | 1  | 0 | -4.218020 | 2.268821  | 1.266221  |
| 46 | 1  | 0 | -4.724553 | -0.215083 | -2.186167 |
| 47 | 6  | 0 | -2.322344 | 0.197205  | -3.325183 |
| 48 | 1  | 0 | -2.620135 | 0.843371  | -4.160271 |
| 49 | 1  | 0 | -2.742653 | -0.791675 | -3.513779 |
| 50 | 1  | 0 | -1.236819 | 0.088741  | -3.341620 |
| 51 | 6  | 0 | -1.697690 | 3.112710  | 0.764084  |
| 52 | 1  | 0 | -0.854182 | 2.610057  | 1.249975  |
| 53 | 1  | 0 | -2.298095 | 3.588768  | 1.541014  |
| 54 | 1  | 0 | -1.267511 | 3.903436  | 0.140805  |
| 55 | 6  | 0 | 2.548034  | -0.740576 | -3.173332 |
| 56 | 1  | 0 | 2.098246  | -0.098761 | -3.937375 |
| 57 | 1  | 0 | 1.722945  | -1.296430 | -2.713919 |
| 58 | 1  | 0 | 3.196521  | -1.458986 | -3.678038 |
| 59 | 6  | 0 | 2.996051  | 3.294040  | -0.154001 |
| 60 | 1  | 0 | 1.911852  | 3.268255  | -0.024590 |
| 61 | 1  | 0 | 3.246751  | 4.132363  | -0.816180 |
| 62 | 1  | 0 | 3.427318  | 3.512280  | 0.823897  |
| 63 | 6  | 0 | -6.027273 | 0.661746  | 0.029517  |
| 64 | 1  | 0 | -6.307923 | -0.358718 | -0.241721 |
| 65 | 1  | 0 | -6.754966 | 1.328873  | -0.444985 |
| 66 | 1  | 0 | -6.147356 | 0.771064  | 1.109462  |
| 67 | 6  | 0 | 6.692960  | -0.090647 | -0.400415 |
| 68 | 1  | 0 | 6.680130  | -0.397220 | 0.650269  |
| 69 | 1  | 0 | 7.441954  | 0.701444  | -0.486732 |
| 70 | 1  | 0 | 7.036956  | -0.943843 | -0.987711 |
| 71 | 17 | 0 | -0.389994 | -1.899088 | -1.480055 |
| 72 | 44 | 0 | 0.359677  | -0.269670 | 0.146579  |
| 73 | 6  | 0 | 1.648738  | -1.557372 | 0.812786  |
| 74 | 1  | 0 | 2.518487  | -1.152367 | 1.332198  |
| 75 | 1  | 0 | 1.847900  | -2.400278 | 0.148043  |
| 76 | 6  | 0 | -0.877296 | -0.890064 | 1.544995  |
| 77 | 1  | 0 | -0.945978 | -0.162704 | 2.362971  |
| 78 | 6  | 0 | 0.416073  | -1.806946 | 1.777240  |
| 79 | 1  | 0 | 0.796598  | -1.416764 | 2.726886  |
| 80 | 17 | 0 | 1.234121  | 1.243903  | 1.828955  |

Nine CD Free Energy = -2332.305059

|    |   |   |           |           |           |
|----|---|---|-----------|-----------|-----------|
| 1  | 6 | 0 | -1.503604 | 3.323639  | 0.707070  |
| 2  | 1 | 0 | -0.642366 | 3.678678  | 1.278965  |
| 3  | 1 | 0 | -2.120828 | 2.779212  | 1.422983  |
| 4  | 6 | 0 | -3.003929 | 0.697608  | 0.013022  |
| 5  | 1 | 0 | -2.854305 | 0.798596  | 1.090278  |
| 6  | 1 | 0 | -3.030348 | -0.381460 | -0.178170 |
| 7  | 6 | 0 | -2.230453 | 4.547315  | 0.124426  |
| 8  | 1 | 0 | -1.475710 | 5.173306  | -0.368174 |
| 9  | 1 | 0 | -2.618978 | 5.151543  | 0.953914  |
| 10 | 6 | 0 | -4.368256 | 1.297787  | -0.378574 |
| 11 | 1 | 0 | -5.117736 | 0.513755  | -0.227253 |
| 12 | 1 | 0 | -4.393456 | 1.513446  | -1.455389 |

|    |   |   |           |           |           |
|----|---|---|-----------|-----------|-----------|
| 13 | 6 | 0 | -3.350079 | 4.278632  | -0.883788 |
| 14 | 1 | 0 | -3.019811 | 3.529073  | -1.615094 |
| 15 | 1 | 0 | -3.500375 | 5.192947  | -1.468859 |
| 16 | 6 | 0 | -4.789560 | 2.541648  | 0.424321  |
| 17 | 1 | 0 | -5.829457 | 2.417100  | 0.746673  |
| 18 | 1 | 0 | -4.213312 | 2.582776  | 1.355827  |
| 19 | 6 | 0 | -4.704802 | 3.875689  | -0.311577 |
| 20 | 1 | 0 | -5.427592 | 3.856980  | -1.138107 |
| 21 | 1 | 0 | -5.052786 | 4.669553  | 0.362650  |
| 22 | 6 | 0 | 1.158641  | -1.327094 | 0.091385  |
| 23 | 7 | 0 | 0.608716  | -2.556526 | 0.122885  |
| 24 | 7 | 0 | 2.494759  | -1.462371 | 0.003711  |
| 25 | 6 | 0 | 1.596269  | -3.612140 | -0.129223 |
| 26 | 1 | 0 | 1.447572  | -4.456019 | 0.549144  |
| 27 | 1 | 0 | 1.499141  | -3.980714 | -1.159569 |
| 28 | 6 | 0 | 2.907347  | -2.871296 | 0.102577  |
| 29 | 1 | 0 | 3.330749  | -3.066394 | 1.097256  |
| 30 | 1 | 0 | 3.671743  | -3.101988 | -0.642835 |
| 31 | 6 | 0 | 3.440659  | -0.393018 | 0.006587  |
| 32 | 6 | 0 | 5.254745  | 1.723288  | 0.000688  |
| 33 | 6 | 0 | 4.106184  | -0.073165 | -1.182552 |
| 34 | 6 | 0 | 3.693655  | 0.290935  | 1.206081  |
| 35 | 6 | 0 | 4.598830  | 1.348411  | 1.174313  |
| 36 | 6 | 0 | 5.003227  | 0.995378  | -1.159109 |
| 37 | 1 | 0 | 4.802707  | 1.889343  | 2.096147  |
| 38 | 1 | 0 | 5.514707  | 1.267075  | -2.079749 |
| 39 | 6 | 0 | -0.801778 | -2.776486 | 0.216275  |
| 40 | 6 | 0 | -3.554011 | -3.127538 | 0.478671  |
| 40 | 6 | 0 | -3.554011 | -3.127538 | 0.478671  |
| 41 | 6 | 0 | -1.351457 | -2.941603 | 1.500379  |
| 42 | 6 | 0 | -1.588798 | -2.845607 | -0.940394 |
| 43 | 6 | 0 | -2.967506 | -3.016166 | -0.777622 |
| 44 | 6 | 0 | -2.727096 | -3.102735 | 1.605315  |
| 45 | 1 | 0 | -3.595606 | -3.055006 | -1.664887 |
| 46 | 1 | 0 | -3.167762 | -3.209132 | 2.593771  |
| 47 | 6 | 0 | -0.470849 | -2.953102 | 2.709465  |
| 48 | 1 | 0 | 0.311542  | -3.715651 | 2.627741  |
| 49 | 1 | 0 | -1.048913 | -3.161453 | 3.610958  |
| 50 | 1 | 0 | 0.021507  | -1.986015 | 2.844182  |
| 51 | 6 | 0 | -0.993970 | -2.797408 | -2.313573 |
| 52 | 1 | 0 | -0.042764 | -2.265226 | -2.345093 |
| 53 | 1 | 0 | -1.662122 | -2.293064 | -3.015104 |
| 54 | 1 | 0 | -0.834173 | -3.812642 | -2.695982 |
| 55 | 6 | 0 | 3.010192  | -0.096836 | 2.479312  |
| 56 | 1 | 0 | 3.002874  | -1.181872 | 2.625490  |
| 57 | 1 | 0 | 1.961399  | 0.220764  | 2.495684  |
| 58 | 1 | 0 | 3.508122  | 0.353388  | 3.339978  |
| 59 | 6 | 0 | 3.886856  | -0.859818 | -2.436797 |
| 60 | 1 | 0 | 2.844312  | -1.168693 | -2.538840 |
| 61 | 1 | 0 | 4.518172  | -1.756824 | -2.456503 |
| 62 | 1 | 0 | 4.143076  | -0.269138 | -3.317686 |
| 63 | 6 | 0 | -5.038180 | -3.258682 | 0.632458  |
| 64 | 1 | 0 | -5.304251 | -4.125912 | 1.243369  |
| 65 | 1 | 0 | -5.538317 | -3.360293 | -0.332325 |
| 66 | 1 | 0 | -5.459544 | -2.381684 | 1.134768  |
| 67 | 6 | 0 | 6.205435  | 2.881615  | -0.003509 |
| 68 | 1 | 0 | 6.951747  | 2.792421  | 0.791009  |
| 69 | 1 | 0 | 5.680576  | 3.827611  | 0.164247  |

|    |    |   |           |          |           |
|----|----|---|-----------|----------|-----------|
| 70 | 1  | 0 | 6.735787  | 2.965183 | -0.953781 |
| 71 | 17 | 0 | -0.559903 | 0.482664 | 2.278260  |
| 72 | 44 | 0 | 0.032236  | 0.354186 | -0.070291 |
| 73 | 6  | 0 | 1.014309  | 1.891935 | 0.070568  |
| 74 | 1  | 0 | 1.574960  | 2.305031 | -0.777939 |
| 75 | 1  | 0 | 1.118886  | 2.408068 | 1.033522  |
| 76 | 6  | 0 | -1.828260 | 1.247601 | -0.754831 |
| 77 | 1  | 0 | -1.814521 | 0.988549 | -1.815079 |
| 78 | 6  | 0 | -1.090812 | 2.408290 | -0.415579 |
| 79 | 1  | 0 | -0.616950 | 2.896909 | -1.268577 |
| 80 | 17 | 0 | 0.599888  | 0.335598 | -2.439381 |

Nine D Free Energy = -2332.312897

|    |    |   |           |           |           |
|----|----|---|-----------|-----------|-----------|
| 1  | 6  | 0 | -2.693087 | -3.008494 | 1.538120  |
| 2  | 6  | 0 | -3.490211 | -3.069105 | 0.391646  |
| 3  | 6  | 0 | -2.871618 | -2.998922 | -0.852216 |
| 4  | 6  | 0 | -1.488269 | -2.839471 | -0.985236 |
| 5  | 6  | 0 | -0.732105 | -2.717982 | 0.189460  |
| 6  | 6  | 0 | -1.316020 | -2.843888 | 1.463723  |
| 7  | 7  | 0 | 0.680818  | -2.506328 | 0.128572  |
| 8  | 6  | 0 | 1.233968  | -1.274738 | 0.026769  |
| 9  | 7  | 0 | 2.576742  | -1.427332 | -0.030612 |
| 10 | 6  | 0 | 2.970541  | -2.827330 | 0.188460  |
| 11 | 6  | 0 | 1.666074  | -3.574939 | -0.045326 |
| 12 | 44 | 0 | 0.049923  | 0.292683  | -0.191916 |
| 13 | 17 | 0 | 0.408117  | 0.232785  | -2.588352 |
| 14 | 6  | 0 | 3.543488  | -0.381768 | 0.058041  |
| 15 | 6  | 0 | 4.250619  | -0.020204 | -1.097742 |
| 16 | 6  | 0 | 5.194729  | 0.997699  | -0.992545 |
| 17 | 6  | 0 | 5.446992  | 1.647793  | 0.216789  |
| 18 | 6  | 0 | 4.735461  | 1.248985  | 1.346173  |
| 19 | 6  | 0 | 3.783842  | 0.230001  | 1.296490  |
| 20 | 6  | 0 | 6.482202  | 2.727724  | 0.301078  |
| 21 | 6  | 0 | 3.963928  | -0.683894 | -2.406821 |
| 22 | 6  | 0 | 3.025211  | -0.176018 | 2.520536  |
| 23 | 6  | 0 | -4.979146 | -3.181989 | 0.508217  |
| 24 | 6  | 0 | -0.468022 | -2.815793 | 2.695243  |
| 25 | 6  | 0 | -0.857615 | -2.886601 | -2.342297 |
| 26 | 17 | 0 | -0.534904 | 0.587354  | 2.132732  |
| 27 | 6  | 0 | 1.321977  | 1.566601  | -0.049124 |
| 28 | 6  | 0 | -2.224794 | 1.144906  | -0.814844 |
| 29 | 6  | 0 | -1.500235 | 2.293836  | -0.750056 |
| 30 | 6  | 0 | -1.669682 | 3.357514  | 0.283367  |
| 31 | 6  | 0 | -2.434098 | 4.554750  | -0.313859 |
| 32 | 6  | 0 | -3.721648 | 4.235191  | -1.075034 |
| 33 | 6  | 0 | -4.955420 | 3.918977  | -0.235876 |
| 34 | 6  | 0 | -4.923671 | 2.665142  | 0.634937  |
| 35 | 6  | 0 | -4.671286 | 1.331821  | -0.093279 |
| 36 | 6  | 0 | -3.284720 | 0.699674  | 0.149667  |
| 37 | 1  | 0 | -0.694535 | 3.710271  | 0.633501  |
| 38 | 1  | 0 | -2.171268 | 2.952154  | 1.164742  |
| 39 | 1  | 0 | -2.972714 | 0.897942  | 1.178939  |
| 40 | 1  | 0 | -3.371132 | -0.388544 | 0.070427  |
| 41 | 1  | 0 | -1.754187 | 5.072186  | -1.001709 |
| 42 | 1  | 0 | -2.645784 | 5.271486  | 0.489571  |
| 43 | 1  | 0 | -5.418429 | 0.605867  | 0.242883  |
| 44 | 1  | 0 | -4.849722 | 1.447867  | -1.170778 |

|    |   |   |           |           |           |
|----|---|---|-----------|-----------|-----------|
| 45 | 1 | 0 | -3.536437 | 3.419592  | -1.786746 |
| 46 | 1 | 0 | -3.964904 | 5.102682  | -1.698878 |
| 47 | 1 | 0 | -5.892156 | 2.606559  | 1.144224  |
| 48 | 1 | 0 | -4.194501 | 2.782345  | 1.444224  |
| 49 | 1 | 0 | -5.813787 | 3.840900  | -0.916430 |
| 50 | 1 | 0 | -5.172072 | 4.781513  | 0.408368  |
| 51 | 1 | 0 | 1.495550  | -4.384941 | 0.668601  |
| 52 | 1 | 0 | 1.599319  | -3.993553 | -1.059172 |
| 53 | 1 | 0 | 3.346404  | -2.955013 | 1.213173  |
| 54 | 1 | 0 | 3.766969  | -3.117923 | -0.500791 |
| 55 | 1 | 0 | 4.925459  | 1.739968  | 2.297906  |
| 56 | 1 | 0 | 5.742409  | 1.297147  | -1.883331 |
| 57 | 1 | 0 | -3.475303 | -3.078676 | -1.753804 |
| 58 | 1 | 0 | -3.159085 | -3.089293 | 2.517362  |
| 59 | 1 | 0 | 0.334155  | -3.560290 | 2.647517  |
| 60 | 1 | 0 | -1.065380 | -3.021964 | 3.584636  |
| 61 | 1 | 0 | -0.002498 | -1.834859 | 2.824234  |
| 62 | 1 | 0 | 0.143253  | -2.456753 | -2.360348 |
| 63 | 1 | 0 | -1.448152 | -2.331973 | -3.074645 |
| 64 | 1 | 0 | -0.798298 | -3.924336 | -2.691434 |
| 65 | 1 | 0 | 3.024038  | -1.262058 | 2.660245  |
| 66 | 1 | 0 | 1.974016  | 0.131195  | 2.466376  |
| 67 | 1 | 0 | 3.458619  | 0.273579  | 3.415525  |
| 68 | 1 | 0 | 2.926045  | -0.510020 | -2.711870 |
| 69 | 1 | 0 | 4.100683  | -1.769208 | -2.353512 |
| 70 | 1 | 0 | 4.622217  | -0.305753 | -3.190642 |
| 71 | 1 | 0 | -5.271230 | -3.904805 | 1.274329  |
| 72 | 1 | 0 | -5.439269 | -3.481488 | -0.435339 |
| 73 | 1 | 0 | -5.420656 | -2.221680 | 0.797201  |
| 74 | 1 | 0 | 6.355760  | 3.339023  | 1.196581  |
| 75 | 1 | 0 | 6.446471  | 3.388800  | -0.568308 |
| 76 | 1 | 0 | 7.492246  | 2.305299  | 0.335470  |
| 77 | 1 | 0 | 1.969882  | 1.844987  | -0.892942 |
| 78 | 1 | 0 | 1.455936  | 2.141438  | 0.880396  |
| 79 | 1 | 0 | -2.138396 | 0.573036  | -1.741562 |
| 80 | 1 | 0 | -0.884070 | 2.536878  | -1.616253 |

## Z-Cyclodecene formation

Ten A            Free Energy = -2371.609026

|    |    |   |           |           |           |
|----|----|---|-----------|-----------|-----------|
| 1  | 6  | 0 | -1.003562 | -2.441011 | 0.053532  |
| 2  | 7  | 0 | -2.160446 | -3.065208 | 0.412970  |
| 3  | 7  | 0 | 0.016828  | -3.274368 | 0.387454  |
| 4  | 6  | 0 | -1.948893 | -4.422167 | 0.909983  |
| 5  | 1  | 0 | -2.512442 | -4.587360 | 1.833353  |
| 6  | 1  | 0 | -2.293969 | -5.156947 | 0.169760  |
| 7  | 6  | 0 | -0.439805 | -4.463877 | 1.112501  |
| 8  | 1  | 0 | -0.155450 | -4.395607 | 2.171174  |
| 9  | 1  | 0 | 0.026447  | -5.365261 | 0.703589  |
| 10 | 6  | 0 | 1.405944  | -2.974290 | 0.312114  |
| 11 | 6  | 0 | 4.117040  | -2.365425 | 0.124719  |
| 12 | 6  | 0 | 2.111455  | -3.367952 | -0.829007 |
| 13 | 6  | 0 | 2.014907  | -2.264356 | 1.354816  |
| 14 | 6  | 0 | 3.373051  | -1.975733 | 1.239909  |
| 15 | 6  | 0 | 3.468140  | -3.053393 | -0.900692 |
| 16 | 1  | 0 | 3.859237  | -1.415882 | 2.035903  |
| 17 | 1  | 0 | 4.028815  | -3.342286 | -1.786615 |
| 18 | 6  | 0 | -3.468244 | -2.538014 | 0.185578  |
| 19 | 6  | 0 | -5.987743 | -1.431131 | -0.260041 |
| 20 | 6  | 0 | -4.091456 | -1.818180 | 1.218375  |
| 21 | 6  | 0 | -4.121874 | -2.797704 | -1.029106 |
| 22 | 6  | 0 | -5.374196 | -2.218993 | -1.231158 |
| 23 | 6  | 0 | -5.342421 | -1.263528 | 0.964824  |
| 24 | 1  | 0 | -5.882464 | -2.392362 | -2.177113 |
| 25 | 1  | 0 | -5.824896 | -0.682019 | 1.747004  |
| 26 | 6  | 0 | -3.473390 | -1.699401 | 2.577812  |
| 27 | 1  | 0 | -3.802558 | -2.527400 | 3.218223  |
| 28 | 1  | 0 | -3.773962 | -0.770639 | 3.065256  |
| 29 | 1  | 0 | -2.383468 | -1.711259 | 2.542607  |
| 30 | 6  | 0 | -3.555280 | -3.733643 | -2.052632 |
| 31 | 1  | 0 | -2.474378 | -3.848052 | -1.966295 |
| 32 | 1  | 0 | -3.758660 | -3.382473 | -3.065418 |
| 33 | 1  | 0 | -4.014364 | -4.724469 | -1.948734 |
| 34 | 6  | 0 | 1.206358  | -1.751485 | 2.505214  |
| 35 | 1  | 0 | 0.653032  | -2.546916 | 3.014424  |
| 36 | 1  | 0 | 0.461036  | -1.021712 | 2.165706  |
| 37 | 1  | 0 | 1.840821  | -1.263090 | 3.246477  |
| 38 | 6  | 0 | 1.396022  | -4.028601 | -1.966122 |
| 39 | 1  | 0 | 0.636872  | -3.359502 | -2.388548 |
| 40 | 1  | 0 | 0.869038  | -4.934262 | -1.648923 |
| 41 | 1  | 0 | 2.087862  | -4.304330 | -2.763391 |
| 42 | 6  | 0 | -7.303941 | -0.768852 | -0.528633 |
| 43 | 1  | 0 | -7.891232 | -0.648098 | 0.384413  |
| 44 | 1  | 0 | -7.902411 | -1.332770 | -1.247441 |
| 45 | 1  | 0 | -7.157191 | 0.231717  | -0.949014 |
| 46 | 6  | 0 | 5.581408  | -2.060274 | 0.039877  |
| 47 | 1  | 0 | 5.813669  | -1.077604 | 0.457614  |
| 48 | 1  | 0 | 5.940286  | -2.084645 | -0.990826 |
| 49 | 1  | 0 | 6.169683  | -2.791543 | 0.604640  |
| 50 | 44 | 0 | -1.021404 | -0.705539 | -0.782514 |
| 51 | 17 | 0 | -1.605190 | 0.566845  | 1.091772  |
| 52 | 17 | 0 | -1.521509 | -1.360839 | -2.961714 |
| 53 | 6  | 0 | 0.708090  | -0.234886 | -0.966980 |
| 54 | 1  | 0 | 1.603011  | -0.834000 | -0.773366 |

|    |   |   |           |           |           |
|----|---|---|-----------|-----------|-----------|
| 55 | 6 | 0 | 4.060143  | 7.855703  | 0.520884  |
| 56 | 6 | 0 | 0.934689  | 1.166646  | -1.421751 |
| 57 | 1 | 0 | 1.500553  | 1.152200  | -2.366164 |
| 58 | 1 | 0 | -0.015869 | 1.674336  | -1.648388 |
| 59 | 6 | 0 | 3.745933  | 6.428696  | 0.942027  |
| 60 | 1 | 0 | 3.152875  | 6.442476  | 1.867245  |
| 61 | 1 | 0 | 4.680522  | 5.911851  | 1.202234  |
| 62 | 6 | 0 | 1.699359  | 1.961377  | -0.357759 |
| 63 | 1 | 0 | 2.649902  | 1.451768  | -0.147244 |
| 64 | 1 | 0 | 1.126233  | 1.935582  | 0.577696  |
| 65 | 6 | 0 | 3.006631  | 5.630818  | -0.120577 |
| 66 | 1 | 0 | 3.591387  | 5.633196  | -1.051197 |
| 67 | 1 | 0 | 2.063424  | 6.137882  | -0.367462 |
| 68 | 6 | 0 | 1.964498  | 3.401801  | -0.767066 |
| 69 | 1 | 0 | 2.529515  | 3.417843  | -1.709780 |
| 70 | 1 | 0 | 1.009667  | 3.898391  | -0.986824 |
| 71 | 6 | 0 | 2.716365  | 4.195254  | 0.289982  |
| 72 | 1 | 0 | 2.140371  | 4.190471  | 1.225559  |
| 73 | 1 | 0 | 3.661678  | 3.685911  | 0.525487  |
| 74 | 1 | 0 | 4.663248  | 7.847106  | -0.396443 |
| 75 | 1 | 0 | 3.128560  | 8.374197  | 0.255365  |
| 76 | 6 | 0 | 4.794028  | 8.653522  | 1.597069  |
| 77 | 1 | 0 | 4.179898  | 8.654364  | 2.509355  |
| 78 | 1 | 0 | 5.730650  | 8.147664  | 1.862761  |
| 79 | 6 | 0 | 5.079786  | 10.060244 | 1.189202  |
| 80 | 1 | 0 | 4.209787  | 10.662625 | 0.922652  |
| 81 | 6 | 0 | 6.288094  | 10.607908 | 1.111721  |
| 82 | 1 | 0 | 7.182344  | 10.043609 | 1.363915  |
| 83 | 1 | 0 | 6.434915  | 11.636026 | 0.798856  |

Ten B Free Energy = -2371.616096

|    |    |   |           |           |           |
|----|----|---|-----------|-----------|-----------|
| 1  | 6  | 0 | -0.007179 | 0.016864  | -0.006458 |
| 2  | 6  | 0 | 0.002163  | -0.010439 | 1.400952  |
| 3  | 6  | 0 | 1.202943  | -0.017657 | 2.130185  |
| 4  | 6  | 0 | 2.395599  | -0.123306 | 1.416146  |
| 5  | 6  | 0 | 2.419598  | -0.198423 | 0.023714  |
| 6  | 6  | 0 | 1.213631  | -0.098514 | -0.668440 |
| 7  | 7  | 0 | -1.240972 | -0.028612 | 2.107492  |
| 8  | 6  | 0 | -1.958296 | -1.177270 | 2.224729  |
| 9  | 7  | 0 | -3.135402 | -0.864525 | 2.805301  |
| 10 | 6  | 0 | -3.195575 | 0.552042  | 3.199054  |
| 11 | 6  | 0 | -2.022197 | 1.159930  | 2.439905  |
| 12 | 6  | 0 | -4.213388 | -1.744350 | 3.115494  |
| 13 | 6  | 0 | -5.178231 | -1.986036 | 2.128830  |
| 14 | 6  | 0 | -6.279229 | -2.769575 | 2.469280  |
| 15 | 6  | 0 | -6.435172 | -3.301109 | 3.749786  |
| 16 | 6  | 0 | -5.447041 | -3.048128 | 4.700692  |
| 17 | 6  | 0 | -4.324136 | -2.274667 | 4.407768  |
| 18 | 6  | 0 | -5.005495 | -1.432634 | 0.750333  |
| 19 | 6  | 0 | -3.251842 | -2.039148 | 5.424954  |
| 20 | 6  | 0 | -7.605161 | -4.177768 | 4.075890  |
| 21 | 44 | 0 | -1.055544 | -2.821212 | 1.616507  |
| 22 | 17 | 0 | -1.900714 | -2.924807 | -0.655370 |
| 23 | 6  | 0 | 1.226911  | 0.141401  | 3.618127  |
| 24 | 6  | 0 | 3.707712  | -0.407887 | -0.710471 |
| 25 | 6  | 0 | -1.265404 | 0.260071  | -0.781212 |
| 26 | 6  | 0 | -2.335878 | -3.981156 | 2.222723  |

|    |    |   |           |           |           |
|----|----|---|-----------|-----------|-----------|
| 27 | 6  | 0 | -3.248224 | -4.891094 | 1.475535  |
| 28 | 6  | 0 | -4.093557 | -5.801482 | 2.369882  |
| 29 | 6  | 0 | -3.334548 | -6.784066 | 3.264284  |
| 30 | 6  | 0 | -2.924334 | -8.103472 | 2.611427  |
| 31 | 6  | 0 | -1.878930 | -8.016267 | 1.504415  |
| 32 | 6  | 0 | -0.521465 | -7.508659 | 1.976892  |
| 33 | 6  | 0 | 0.446775  | -7.237795 | 0.828122  |
| 34 | 6  | 0 | 0.206961  | -5.884082 | 0.162911  |
| 35 | 6  | 0 | 0.650408  | -4.744680 | 1.028066  |
| 36 | 6  | 0 | 0.966441  | -3.513090 | 0.563464  |
| 37 | 17 | 0 | 0.073825  | -2.948417 | 3.764057  |
| 38 | 1  | 0 | -2.679217 | -5.446892 | 0.721498  |
| 39 | 1  | 0 | -3.901116 | -4.258951 | 0.855087  |
| 40 | 1  | 0 | -0.856632 | -5.761584 | -0.089813 |
| 41 | 1  | 0 | 0.722018  | -5.821531 | -0.802007 |
| 42 | 1  | 0 | -0.643868 | -6.590060 | 2.568194  |
| 43 | 1  | 0 | -0.093916 | -8.242236 | 2.671061  |
| 44 | 1  | 0 | -3.972352 | -7.026816 | 4.122260  |
| 45 | 1  | 0 | -2.459368 | -6.282767 | 3.700528  |
| 46 | 1  | 0 | -3.825528 | -8.590765 | 2.216709  |
| 47 | 1  | 0 | -2.544946 | -8.775078 | 3.393225  |
| 48 | 1  | 0 | -2.251008 | -7.393750 | 0.681284  |
| 49 | 1  | 0 | -1.742440 | -9.012432 | 1.064284  |
| 50 | 1  | 0 | 0.361430  | -8.036354 | 0.081399  |
| 51 | 1  | 0 | 1.481884  | -7.274361 | 1.187834  |
| 52 | 1  | 0 | -4.698334 | -5.148782 | 3.007498  |
| 53 | 1  | 0 | -4.809159 | -6.351896 | 1.743758  |
| 54 | 1  | 0 | -1.434764 | 1.858503  | 3.042049  |
| 55 | 1  | 0 | -2.339917 | 1.680762  | 1.525192  |
| 56 | 1  | 0 | -3.079896 | 0.645739  | 4.286466  |
| 57 | 1  | 0 | -4.161285 | 0.984082  | 2.923899  |
| 58 | 1  | 0 | -5.545681 | -3.470729 | 5.698176  |
| 59 | 1  | 0 | -7.036256 | -2.967328 | 1.713528  |
| 60 | 1  | 0 | 1.217574  | -0.110911 | -1.756017 |
| 61 | 1  | 0 | 3.332183  | -0.157467 | 1.968272  |
| 62 | 1  | 0 | 1.463530  | 1.180469  | 3.878247  |
| 63 | 1  | 0 | 1.989770  | -0.493724 | 4.071248  |
| 64 | 1  | 0 | 0.274150  | -0.122540 | 4.076190  |
| 65 | 1  | 0 | -2.152318 | -0.137329 | -0.286343 |
| 66 | 1  | 0 | -1.217658 | -0.204126 | -1.766459 |
| 67 | 1  | 0 | -1.407032 | 1.338632  | -0.925823 |
| 68 | 1  | 0 | -3.247728 | -1.002767 | 5.781117  |
| 69 | 1  | 0 | -2.255065 | -2.239214 | 5.014116  |
| 70 | 1  | 0 | -3.393621 | -2.677751 | 6.298411  |
| 71 | 1  | 0 | -4.124816 | -1.864663 | 0.257532  |
| 72 | 1  | 0 | -4.849628 | -0.348200 | 0.765747  |
| 73 | 1  | 0 | -5.877971 | -1.638966 | 0.128388  |
| 74 | 1  | 0 | 4.561904  | -0.018924 | -0.152302 |
| 75 | 1  | 0 | 3.696280  | 0.066139  | -1.694444 |
| 76 | 1  | 0 | 3.890151  | -1.476330 | -0.872974 |
| 77 | 1  | 0 | -7.854326 | -4.143939 | 5.138498  |
| 78 | 1  | 0 | -7.388835 | -5.223926 | 3.829910  |
| 79 | 1  | 0 | -8.494316 | -3.895411 | 3.508069  |
| 80 | 1  | 0 | -2.434247 | -4.034261 | 3.322475  |
| 81 | 1  | 0 | 1.444390  | -2.779287 | 1.215432  |
| 82 | 1  | 0 | 0.893709  | -3.275097 | -0.494626 |
| 83 | 1  | 0 | 0.805217  | -4.942644 | 2.089180  |

Ten BC      Free Energy = -2371.602570

|    |   |   |           |           |           |
|----|---|---|-----------|-----------|-----------|
| 1  | 6 | 0 | 2.700233  | 0.387983  | -0.209409 |
| 2  | 1 | 0 | 2.848832  | 1.083214  | -1.041420 |
| 3  | 1 | 0 | 2.512697  | -0.560569 | -0.729855 |
| 4  | 6 | 0 | 1.306393  | 3.287386  | -1.007640 |
| 5  | 1 | 0 | 1.962497  | 2.581275  | -1.522044 |
| 6  | 1 | 0 | 0.589018  | 3.583889  | -1.777759 |
| 7  | 6 | 0 | 3.951700  | 0.234652  | 0.666135  |
| 8  | 6 | 0 | 2.105541  | 4.506182  | -0.541550 |
| 9  | 6 | 0 | 3.251954  | 4.166648  | 0.405496  |
| 10 | 1 | 0 | 2.851103  | 3.614926  | 1.264403  |
| 11 | 1 | 0 | 3.660944  | 5.088631  | 0.835041  |
| 12 | 6 | 0 | 4.420349  | 1.435480  | 1.488914  |
| 13 | 1 | 0 | 5.075488  | 1.054465  | 2.280656  |
| 14 | 1 | 0 | 3.565190  | 1.866040  | 2.025628  |
| 15 | 6 | 0 | 5.188813  | 2.530405  | 0.748797  |
| 16 | 1 | 0 | 6.038863  | 2.071641  | 0.227239  |
| 17 | 1 | 0 | 5.631595  | 3.202467  | 1.496126  |
| 18 | 6 | 0 | 4.384177  | 3.368111  | -0.241576 |
| 19 | 1 | 0 | 3.989492  | 2.722397  | -1.032811 |
| 20 | 1 | 0 | 5.060099  | 4.059341  | -0.759198 |
| 21 | 1 | 0 | 2.500787  | 5.021913  | -1.425727 |
| 22 | 1 | 0 | 1.428653  | 5.219861  | -0.055619 |
| 23 | 1 | 0 | 3.758791  | -0.593184 | 1.359903  |
| 24 | 1 | 0 | 4.772060  | -0.113827 | 0.023789  |
| 25 | 6 | 0 | -1.174593 | -1.363394 | -0.132090 |
| 26 | 7 | 0 | -0.599978 | -2.568619 | -0.281665 |
| 27 | 7 | 0 | -2.508140 | -1.529121 | -0.089242 |
| 28 | 6 | 0 | -1.585339 | -3.659245 | -0.197078 |
| 29 | 1 | 0 | -1.405499 | -4.404865 | -0.974823 |
| 30 | 1 | 0 | -1.504555 | -4.160444 | 0.776437  |
| 31 | 6 | 0 | -2.904220 | -2.916193 | -0.363670 |
| 32 | 1 | 0 | -3.307260 | -2.992590 | -1.382881 |
| 33 | 1 | 0 | -3.678678 | -3.244475 | 0.333882  |
| 34 | 6 | 0 | -3.438629 | -0.448284 | 0.012831  |
| 35 | 6 | 0 | -5.179756 | 1.712004  | 0.296067  |
| 36 | 6 | 0 | -4.069576 | -0.234379 | 1.251604  |
| 37 | 6 | 0 | -3.707006 | 0.358127  | -1.100761 |
| 38 | 6 | 0 | -4.573705 | 1.441734  | -0.924266 |
| 39 | 6 | 0 | -4.926186 | 0.851341  | 1.368166  |
| 40 | 1 | 0 | -4.782513 | 2.083511  | -1.777768 |
| 41 | 1 | 0 | -5.400557 | 1.041807  | 2.328169  |
| 42 | 6 | 0 | 0.806139  | -2.815168 | -0.344490 |
| 43 | 6 | 0 | 3.546941  | -3.294771 | -0.502894 |
| 44 | 6 | 0 | 1.384981  | -3.043451 | -1.599545 |
| 45 | 6 | 0 | 1.557761  | -2.854362 | 0.838729  |
| 46 | 6 | 0 | 2.924904  | -3.101960 | 0.730288  |
| 47 | 6 | 0 | 2.760359  | -3.266586 | -1.653436 |
| 48 | 1 | 0 | 3.522557  | -3.132510 | 1.638906  |
| 49 | 1 | 0 | 3.227165  | -3.419102 | -2.623600 |
| 50 | 6 | 0 | 0.553448  | -3.034937 | -2.843177 |
| 51 | 1 | 0 | -0.191026 | -3.839111 | -2.837344 |
| 52 | 1 | 0 | 1.174591  | -3.170962 | -3.729752 |
| 53 | 1 | 0 | 0.018965  | -2.086411 | -2.947652 |
| 54 | 6 | 0 | 0.923534  | -2.613504 | 2.172710  |
| 55 | 1 | 0 | 0.597127  | -1.573520 | 2.291077  |
| 56 | 1 | 0 | 1.619137  | -2.842823 | 2.982007  |



|    |    |   |           |           |           |
|----|----|---|-----------|-----------|-----------|
| 57 | 1  | 0 | 0.028496  | -3.226721 | 2.319571  |
| 58 | 6  | 0 | -3.151553 | 0.078819  | -2.464688 |
| 59 | 1  | 0 | -2.486351 | -0.784345 | -2.490083 |
| 60 | 1  | 0 | -2.567716 | 0.921585  | -2.844161 |
| 61 | 1  | 0 | -3.967869 | -0.095626 | -3.173255 |
| 62 | 6  | 0 | -3.841553 | -1.158385 | 2.406380  |
| 63 | 1  | 0 | -2.796591 | -1.467743 | 2.471745  |
| 64 | 1  | 0 | -4.462710 | -2.058719 | 2.320289  |
| 65 | 1  | 0 | -4.101492 | -0.674342 | 3.348942  |
| 66 | 6  | 0 | 5.021928  | -3.546536 | -0.578866 |
| 67 | 1  | 0 | 5.572007  | -2.913981 | 0.123036  |
| 68 | 1  | 0 | 5.412424  | -3.359791 | -1.581085 |
| 69 | 1  | 0 | 5.261532  | -4.584505 | -0.324581 |
| 70 | 6  | 0 | -6.079728 | 2.896742  | 0.468931  |
| 71 | 1  | 0 | -5.615305 | 3.654355  | 1.108404  |
| 72 | 1  | 0 | -7.023832 | 2.619515  | 0.946136  |
| 73 | 1  | 0 | -6.311579 | 3.370861  | -0.486561 |
| 74 | 17 | 0 | 0.243218  | 0.479744  | -2.366790 |
| 75 | 44 | 0 | -0.306741 | 0.490482  | -0.016643 |
| 76 | 6  | 0 | -0.877242 | 2.469752  | 0.022776  |
| 77 | 1  | 0 | -1.499842 | 2.640616  | 0.897756  |
| 78 | 1  | 0 | -1.318861 | 2.711617  | -0.945445 |
| 79 | 6  | 0 | 1.458524  | 0.738856  | 0.546651  |
| 80 | 1  | 0 | 1.586555  | 0.898249  | 1.627810  |
| 81 | 6  | 0 | 0.549939  | 2.628079  | 0.127080  |
| 82 | 1  | 0 | 0.875772  | 2.890728  | 1.133853  |
| 83 | 17 | 0 | -0.906453 | 0.564433  | 2.353733  |

Ten C

Free Energy = -2371.609275

|    |   |   |           |           |           |
|----|---|---|-----------|-----------|-----------|
| 1  | 6 | 0 | 2.777466  | 0.539617  | -0.143126 |
| 2  | 1 | 0 | 3.077738  | 1.148807  | -0.996495 |
| 3  | 1 | 0 | 2.542202  | -0.427952 | -0.605313 |
| 4  | 6 | 0 | 1.456546  | 3.264255  | -1.002094 |
| 5  | 1 | 0 | 2.144373  | 2.651406  | -1.585912 |
| 6  | 1 | 0 | 0.712799  | 3.598199  | -1.728918 |
| 7  | 6 | 0 | 3.932897  | 0.302298  | 0.838813  |
| 8  | 6 | 0 | 2.167315  | 4.486803  | -0.420972 |
| 9  | 6 | 0 | 3.269558  | 4.152907  | 0.577064  |
| 10 | 1 | 0 | 2.836938  | 3.545735  | 1.381113  |
| 11 | 1 | 0 | 3.613119  | 5.069325  | 1.071040  |
| 12 | 6 | 0 | 4.448797  | 1.472975  | 1.674245  |
| 13 | 1 | 0 | 5.097765  | 1.054866  | 2.452690  |
| 14 | 1 | 0 | 3.611810  | 1.917846  | 2.226870  |
| 15 | 6 | 0 | 5.243447  | 2.563025  | 0.954493  |
| 16 | 1 | 0 | 6.093233  | 2.099701  | 0.436423  |
| 17 | 1 | 0 | 5.686836  | 3.217469  | 1.716960  |
| 18 | 6 | 0 | 4.465172  | 3.425495  | -0.036597 |
| 19 | 1 | 0 | 4.133685  | 2.808817  | -0.876820 |
| 20 | 1 | 0 | 5.145121  | 4.161181  | -0.482651 |
| 21 | 1 | 0 | 2.581673  | 5.074462  | -1.250111 |
| 22 | 1 | 0 | 1.424208  | 5.134508  | 0.062214  |
| 23 | 1 | 0 | 3.604581  | -0.478338 | 1.537846  |
| 24 | 1 | 0 | 4.764820  | -0.145688 | 0.277911  |
| 25 | 6 | 0 | -1.229074 | -1.328263 | -0.184767 |
| 26 | 7 | 0 | -0.655486 | -2.542329 | -0.222123 |
| 27 | 7 | 0 | -2.562790 | -1.475511 | -0.166109 |
| 28 | 6 | 0 | -1.645194 | -3.620831 | -0.080961 |

|    |    |   |           |           |           |
|----|----|---|-----------|-----------|-----------|
| 29 | 1  | 0 | -1.457538 | -4.413999 | -0.808425 |
| 30 | 1  | 0 | -1.581866 | -4.059540 | 0.923352  |
| 31 | 6  | 0 | -2.958464 | -2.884188 | -0.317371 |
| 32 | 1  | 0 | -3.360976 | -3.050288 | -1.325174 |
| 33 | 1  | 0 | -3.735101 | -3.142559 | 0.405909  |
| 34 | 6  | 0 | -3.509590 | -0.414481 | -0.015402 |
| 35 | 6  | 0 | -5.306633 | 1.687645  | 0.321854  |
| 36 | 6  | 0 | -4.116406 | -0.231621 | 1.235958  |
| 37 | 6  | 0 | -3.812339 | 0.401906  | -1.112381 |
| 38 | 6  | 0 | -4.709786 | 1.451509  | -0.913688 |
| 39 | 6  | 0 | -5.005744 | 0.828164  | 1.378740  |
| 40 | 1  | 0 | -4.952741 | 2.096474  | -1.755263 |
| 41 | 1  | 0 | -5.466269 | 0.995312  | 2.349758  |
| 42 | 6  | 0 | 0.751278  | -2.773388 | -0.336384 |
| 43 | 6  | 0 | 3.491991  | -3.191997 | -0.597394 |
| 44 | 6  | 0 | 1.286496  | -2.995927 | -1.614465 |
| 45 | 6  | 0 | 1.544942  | -2.798122 | 0.817483  |
| 46 | 6  | 0 | 2.914013  | -3.017345 | 0.657317  |
| 47 | 6  | 0 | 2.661079  | -3.185645 | -1.719710 |
| 48 | 1  | 0 | 3.546507  | -3.034054 | 1.541759  |
| 49 | 1  | 0 | 3.094568  | -3.328207 | -2.706767 |
| 50 | 6  | 0 | 0.402798  | -3.033969 | -2.821108 |
| 51 | 1  | 0 | -0.279610 | -3.891321 | -2.790670 |
| 52 | 1  | 0 | 0.993165  | -3.117603 | -3.734567 |
| 53 | 1  | 0 | -0.200751 | -2.126052 | -2.898443 |
| 54 | 6  | 0 | 0.952005  | -2.589406 | 2.175928  |
| 55 | 1  | 0 | 0.459033  | -1.615105 | 2.267856  |
| 56 | 1  | 0 | 1.719900  | -2.652582 | 2.948996  |
| 57 | 1  | 0 | 0.192136  | -3.344202 | 2.405898  |
| 58 | 6  | 0 | -3.198743 | 0.171988  | -2.458488 |
| 59 | 1  | 0 | -3.098291 | -0.892344 | -2.689114 |
| 60 | 1  | 0 | -2.189072 | 0.591253  | -2.532469 |
| 61 | 1  | 0 | -3.803816 | 0.631900  | -3.242225 |
| 62 | 6  | 0 | -3.835337 | -1.146517 | 2.387613  |
| 63 | 1  | 0 | -2.813114 | -1.529944 | 2.362233  |
| 64 | 1  | 0 | -4.526081 | -1.999270 | 2.395366  |
| 65 | 1  | 0 | -3.959376 | -0.622470 | 3.336657  |
| 66 | 6  | 0 | 4.969511  | -3.391990 | -0.743858 |
| 67 | 1  | 0 | 5.387131  | -2.733004 | -1.510292 |
| 68 | 1  | 0 | 5.206160  | -4.416928 | -1.047491 |
| 69 | 1  | 0 | 5.496804  | -3.195692 | 0.191806  |
| 70 | 6  | 0 | -6.240976 | 2.841819  | 0.519955  |
| 71 | 1  | 0 | -6.569675 | 3.263580  | -0.431765 |
| 72 | 1  | 0 | -5.758262 | 3.646472  | 1.084262  |
| 73 | 1  | 0 | -7.129485 | 2.550076  | 1.085820  |
| 74 | 17 | 0 | 0.418971  | 0.414862  | -2.432437 |
| 75 | 44 | 0 | -0.233823 | 0.431802  | -0.110771 |
| 76 | 6  | 0 | -0.789466 | 2.284414  | -0.207892 |
| 77 | 1  | 0 | -1.428807 | 2.649862  | 0.596645  |
| 78 | 1  | 0 | -1.046214 | 2.641611  | -1.207228 |
| 79 | 6  | 0 | 1.519737  | 1.066798  | 0.519685  |
| 80 | 1  | 0 | 1.569056  | 1.031961  | 1.612646  |
| 81 | 6  | 0 | 0.768057  | 2.426298  | 0.089658  |
| 82 | 1  | 0 | 0.738715  | 2.942904  | 1.055138  |
| 83 | 17 | 0 | -0.907290 | 0.564363  | 2.229701  |

Ten CD

Free Energy = -2371.600004

|    |   |   |           |           |           |
|----|---|---|-----------|-----------|-----------|
| 1  | 6 | 0 | -2.800943 | -0.660409 | -0.114276 |
| 2  | 1 | 0 | -3.005080 | -1.194558 | -1.043712 |
| 3  | 1 | 0 | -2.523873 | 0.348957  | -0.450861 |
| 4  | 6 | 0 | -1.285449 | -3.328435 | -0.925094 |
| 5  | 1 | 0 | -1.896912 | -2.769248 | -1.635773 |
| 6  | 1 | 0 | -0.401417 | -3.624174 | -1.494351 |
| 7  | 6 | 0 | -4.048732 | -0.501604 | 0.767292  |
| 8  | 6 | 0 | -1.999660 | -4.600850 | -0.448580 |
| 9  | 6 | 0 | -3.219228 | -4.349881 | 0.430235  |
| 10 | 1 | 0 | -2.897112 | -3.792999 | 1.318016  |
| 11 | 1 | 0 | -3.595889 | -5.304426 | 0.815813  |
| 12 | 6 | 0 | -4.580221 | -1.727962 | 1.509136  |
| 13 | 1 | 0 | -5.311456 | -1.372104 | 2.244273  |
| 14 | 1 | 0 | -3.772809 | -2.162952 | 2.111135  |
| 15 | 6 | 0 | -5.258403 | -2.815191 | 0.675399  |
| 16 | 1 | 0 | -6.073543 | -2.361245 | 0.097076  |
| 17 | 1 | 0 | -5.743937 | -3.519644 | 1.363986  |
| 18 | 6 | 0 | -4.352504 | -3.600108 | -0.270502 |
| 19 | 1 | 0 | -3.941514 | -2.921201 | -1.022642 |
| 20 | 1 | 0 | -4.959603 | -4.314173 | -0.839992 |
| 21 | 1 | 0 | -2.286277 | -5.182329 | -1.333623 |
| 22 | 1 | 0 | -1.284130 | -5.225057 | 0.101638  |
| 23 | 1 | 0 | -3.817500 | 0.265329  | 1.518982  |
| 24 | 1 | 0 | -4.847115 | -0.071005 | 0.148087  |
| 25 | 6 | 0 | 1.233871  | 1.349214  | -0.205076 |
| 26 | 7 | 0 | 0.633479  | 2.554815  | -0.245157 |
| 27 | 7 | 0 | 2.563326  | 1.539163  | -0.152108 |
| 28 | 6 | 0 | 1.582413  | 3.655285  | -0.038099 |
| 29 | 1 | 0 | 1.392762  | 4.470667  | -0.740765 |
| 30 | 1 | 0 | 1.480930  | 4.053152  | 0.980828  |
| 31 | 6 | 0 | 2.920522  | 2.961442  | -0.264867 |
| 32 | 1 | 0 | 3.336178  | 3.163645  | -1.260751 |
| 33 | 1 | 0 | 3.676167  | 3.226948  | 0.478089  |
| 34 | 6 | 0 | 3.549813  | 0.510727  | -0.057825 |
| 35 | 6 | 0 | 5.447858  | -1.520377 | 0.141805  |
| 36 | 6 | 0 | 4.182822  | 0.291948  | 1.171272  |
| 37 | 6 | 0 | 3.869755  | -0.236908 | -1.201202 |
| 38 | 6 | 0 | 4.816348  | -1.250300 | -1.073025 |
| 39 | 6 | 0 | 5.125304  | -0.733694 | 1.244588  |
| 40 | 1 | 0 | 5.073872  | -1.838595 | -1.951113 |
| 41 | 1 | 0 | 5.614160  | -0.925224 | 2.197094  |
| 42 | 6 | 0 | -0.784114 | 2.727481  | -0.312294 |
| 43 | 6 | 0 | -3.550989 | 3.004826  | -0.516363 |
| 44 | 6 | 0 | -1.363792 | 2.889168  | -1.583067 |
| 45 | 6 | 0 | -1.551208 | 2.756920  | 0.860322  |
| 46 | 6 | 0 | -2.936036 | 2.894323  | 0.726198  |
| 47 | 6 | 0 | -2.746373 | 3.009261  | -1.659400 |
| 48 | 1 | 0 | -3.546961 | 2.908041  | 1.626070  |
| 49 | 1 | 0 | -3.209441 | 3.108942  | -2.638256 |
| 50 | 6 | 0 | -0.508799 | 2.943118  | -2.809131 |
| 51 | 1 | 0 | 0.188192  | 3.788064  | -2.771341 |
| 52 | 1 | 0 | -1.119365 | 3.056242  | -3.706103 |
| 53 | 1 | 0 | 0.080040  | 2.028830  | -2.918743 |
| 54 | 6 | 0 | -0.932300 | 2.702136  | 2.222667  |
| 55 | 1 | 0 | 0.030559  | 2.190656  | 2.232684  |
| 56 | 1 | 0 | -1.578663 | 2.173405  | 2.927123  |
| 57 | 1 | 0 | -0.788982 | 3.714948  | 2.617781  |
| 58 | 6 | 0 | 3.213863  | 0.044153  | -2.516463 |

|    |    |   |           |           |           |
|----|----|---|-----------|-----------|-----------|
| 59 | 1  | 0 | 3.226699  | 1.112492  | -2.755344 |
| 60 | 1  | 0 | 2.160702  | -0.258377 | -2.525658 |
| 61 | 1  | 0 | 3.720247  | -0.485153 | -3.325347 |
| 62 | 6  | 0 | 3.886888  | 1.136035  | 2.372056  |
| 63 | 1  | 0 | 2.852382  | 1.484098  | 2.378184  |
| 64 | 1  | 0 | 4.549511  | 2.009565  | 2.414714  |
| 65 | 1  | 0 | 4.042340  | 0.569926  | 3.292069  |
| 66 | 6  | 0 | -5.038447 | 3.141817  | -0.631836 |
| 67 | 1  | 0 | -5.322307 | 4.162961  | -0.906903 |
| 68 | 1  | 0 | -5.539134 | 2.904199  | 0.308946  |
| 69 | 1  | 0 | -5.442471 | 2.483624  | -1.405772 |
| 70 | 6  | 0 | 6.437030  | -2.640299 | 0.255684  |
| 71 | 1  | 0 | 5.930359  | -3.606404 | 0.353580  |
| 72 | 1  | 0 | 7.080797  | -2.523888 | 1.129730  |
| 73 | 1  | 0 | 7.074905  | -2.707013 | -0.629182 |
| 74 | 44 | 0 | 0.187626  | -0.389624 | -0.045399 |
| 75 | 17 | 0 | -0.416281 | -0.492318 | -2.388994 |
| 76 | 17 | 0 | 0.772294  | -0.373240 | 2.323055  |
| 77 | 6  | 0 | 1.175662  | -1.928625 | -0.170112 |
| 78 | 1  | 0 | 1.718429  | -2.350708 | 0.684924  |
| 79 | 1  | 0 | 1.313067  | -2.426562 | -1.137945 |
| 80 | 6  | 0 | -1.639902 | -1.280088 | 0.628309  |
| 81 | 1  | 0 | -1.617886 | -1.063889 | 1.698433  |
| 82 | 6  | 0 | -0.912285 | -2.446976 | 0.244870  |
| 83 | 1  | 0 | -0.473026 | -2.975103 | 1.093725  |

Ten D Free Energy = -2371.608746

|    |   |   |           |           |           |
|----|---|---|-----------|-----------|-----------|
| 1  | 6 | 0 | -3.057188 | -0.399843 | -0.290562 |
| 2  | 1 | 0 | -3.148659 | -1.011073 | -1.189200 |
| 3  | 1 | 0 | -2.626902 | 0.546571  | -0.646636 |
| 4  | 6 | 0 | -1.652040 | -3.246501 | -0.485945 |
| 5  | 1 | 0 | -2.055764 | -2.772984 | -1.383874 |
| 6  | 1 | 0 | -0.667387 | -3.623333 | -0.780126 |
| 7  | 6 | 0 | -4.422291 | -0.076208 | 0.337282  |
| 8  | 6 | 0 | -2.519782 | -4.437876 | -0.044973 |
| 9  | 6 | 0 | -3.871987 | -4.039843 | 0.536468  |
| 10 | 1 | 0 | -3.694221 | -3.440464 | 1.436704  |
| 11 | 1 | 0 | -4.396311 | -4.935810 | 0.888602  |
| 12 | 6 | 0 | -5.150233 | -1.193038 | 1.087329  |
| 13 | 1 | 0 | -5.966795 | -0.727163 | 1.651183  |
| 14 | 1 | 0 | -4.482459 | -1.606721 | 1.854090  |
| 15 | 6 | 0 | -5.757010 | -2.320848 | 0.250738  |
| 16 | 1 | 0 | -6.413984 | -1.879559 | -0.510204 |
| 17 | 1 | 0 | -6.416515 | -2.910330 | 0.901639  |
| 18 | 6 | 0 | -4.770670 | -3.266856 | -0.430484 |
| 19 | 1 | 0 | -4.158609 | -2.701030 | -1.137615 |
| 20 | 1 | 0 | -5.328398 | -3.977860 | -1.051803 |
| 21 | 1 | 0 | -2.656191 | -5.099054 | -0.909473 |
| 22 | 1 | 0 | -1.969922 | -5.025110 | 0.700499  |
| 23 | 1 | 0 | -4.271083 | 0.754223  | 1.040297  |
| 24 | 1 | 0 | -5.074575 | 0.321168  | -0.451197 |
| 25 | 6 | 0 | 1.456523  | 1.176840  | -0.052757 |
| 26 | 7 | 0 | 0.968934  | 2.433681  | -0.179239 |
| 27 | 7 | 0 | 2.803584  | 1.262106  | 0.037840  |
| 28 | 6 | 0 | 2.002160  | 3.452741  | 0.013453  |
| 29 | 1 | 0 | 1.891922  | 4.264333  | -0.710359 |
| 30 | 1 | 0 | 1.928198  | 3.883113  | 1.021915  |

|    |    |   |           |           |           |
|----|----|---|-----------|-----------|-----------|
| 31 | 6  | 0 | 3.273177  | 2.639012  | -0.178571 |
| 32 | 1  | 0 | 3.683383  | 2.739752  | -1.192935 |
| 33 | 1  | 0 | 4.063449  | 2.894577  | 0.531251  |
| 34 | 6  | 0 | 3.716674  | 0.167914  | -0.030603 |
| 35 | 6  | 0 | 5.513272  | -1.958946 | -0.150523 |
| 36 | 6  | 0 | 4.376928  | -0.231061 | 1.139583  |
| 37 | 6  | 0 | 3.952173  | -0.455068 | -1.265105 |
| 38 | 6  | 0 | 4.850186  | -1.521290 | -1.295759 |
| 39 | 6  | 0 | 5.267485  | -1.298552 | 1.053761  |
| 40 | 1  | 0 | 5.035694  | -2.020623 | -2.244136 |
| 41 | 1  | 0 | 5.777173  | -1.628377 | 1.956324  |
| 42 | 6  | 0 | -0.428253 | 2.726073  | -0.269288 |
| 43 | 6  | 0 | -3.153626 | 3.266860  | -0.529296 |
| 44 | 6  | 0 | -0.971284 | 2.916932  | -1.553995 |
| 45 | 6  | 0 | -1.207980 | 2.859603  | 0.888606  |
| 46 | 6  | 0 | -2.574079 | 3.116047  | 0.725352  |
| 47 | 6  | 0 | -2.332225 | 3.174373  | -1.657500 |
| 48 | 1  | 0 | -3.194705 | 3.210852  | 1.614284  |
| 49 | 1  | 0 | -2.766514 | 3.304656  | -2.645928 |
| 50 | 6  | 0 | -0.099768 | 2.850201  | -2.767409 |
| 51 | 1  | 0 | 0.737556  | 3.553424  | -2.701331 |
| 52 | 1  | 0 | -0.667026 | 3.089329  | -3.668135 |
| 53 | 1  | 0 | 0.318014  | 1.847138  | -2.889293 |
| 54 | 6  | 0 | -0.623340 | 2.813926  | 2.266287  |
| 55 | 1  | 0 | 0.395835  | 2.430660  | 2.284782  |
| 56 | 1  | 0 | -1.205550 | 2.164850  | 2.924811  |
| 57 | 1  | 0 | -0.628934 | 3.816864  | 2.708294  |
| 58 | 6  | 0 | 3.241576  | -0.009497 | -2.504095 |
| 59 | 1  | 0 | 3.297864  | 1.075410  | -2.641053 |
| 60 | 1  | 0 | 2.175217  | -0.262992 | -2.473060 |
| 61 | 1  | 0 | 3.670890  | -0.479006 | -3.390801 |
| 62 | 6  | 0 | 4.097992  | 0.448149  | 2.442347  |
| 63 | 1  | 0 | 3.042304  | 0.345266  | 2.716511  |
| 64 | 1  | 0 | 4.311542  | 1.521501  | 2.396704  |
| 65 | 1  | 0 | 4.705626  | 0.024627  | 3.243695  |
| 66 | 6  | 0 | -4.616524 | 3.552685  | -0.678495 |
| 67 | 1  | 0 | -5.065949 | 2.939754  | -1.464377 |
| 68 | 1  | 0 | -4.788392 | 4.597571  | -0.957763 |
| 69 | 1  | 0 | -5.162495 | 3.367392  | 0.248667  |
| 70 | 6  | 0 | 6.494811  | -3.088934 | -0.218042 |
| 71 | 1  | 0 | 6.254121  | -3.784942 | -1.024277 |
| 72 | 1  | 0 | 6.528319  | -3.651276 | 0.717656  |
| 73 | 1  | 0 | 7.509013  | -2.719446 | -0.405229 |
| 74 | 44 | 0 | 0.195502  | -0.331470 | 0.136150  |
| 75 | 17 | 0 | -0.366109 | -0.554147 | -2.203273 |
| 76 | 17 | 0 | 0.509573  | -0.325078 | 2.541458  |
| 77 | 6  | 0 | 1.406380  | -1.665910 | 0.013196  |
| 78 | 1  | 0 | 2.021399  | -1.986180 | 0.866389  |
| 79 | 1  | 0 | 1.531467  | -2.237553 | -0.919862 |
| 80 | 6  | 0 | -2.113686 | -1.024362 | 0.691123  |
| 81 | 1  | 0 | -2.013906 | -0.501254 | 1.646490  |
| 82 | 6  | 0 | -1.501071 | -2.238284 | 0.610264  |
| 83 | 1  | 0 | -0.954932 | -2.561324 | 1.498035  |

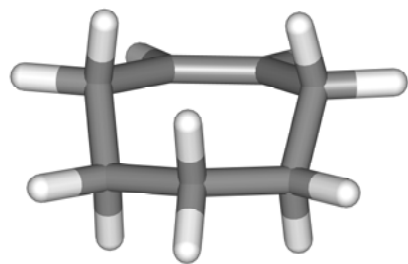

**(a)**

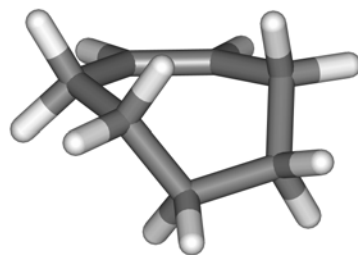

**(b)**

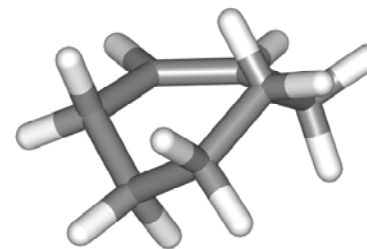

**(c)**

**Fig. S1** Conformers found for cycloheptene: **(a)** Chair, **(b)** twist-chair and **(c)** twist-boat.

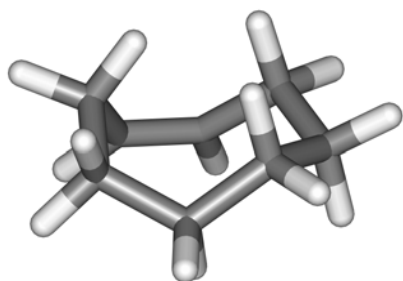

**(a)**

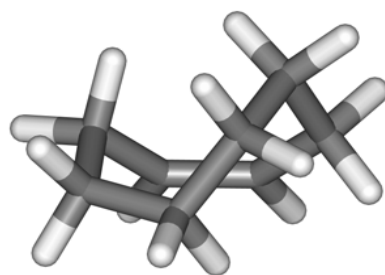

**(b)**

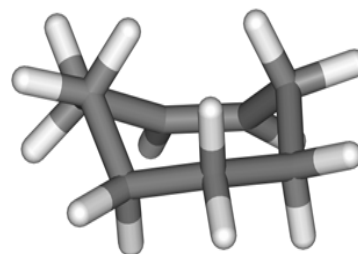

**(c)**

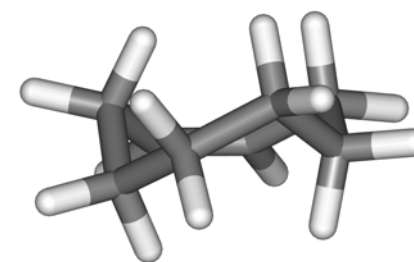

**(d)**

**Fig. S2.** Conformers found for cyclooctene; **(a)** boat-chair, **(b)** boat-boat/chair-boat, **(c)** twist-chair-chair, **(d)** chair-chair.

## A-Complexes (initial 14e alkylidene complexes)

|                                                                                                                     |                                                                                                                                                                                                                                                                                                                                                                                                                                                                  |                                                                                                                    |
|---------------------------------------------------------------------------------------------------------------------|------------------------------------------------------------------------------------------------------------------------------------------------------------------------------------------------------------------------------------------------------------------------------------------------------------------------------------------------------------------------------------------------------------------------------------------------------------------|--------------------------------------------------------------------------------------------------------------------|
| <p>Template structure (2)</p> 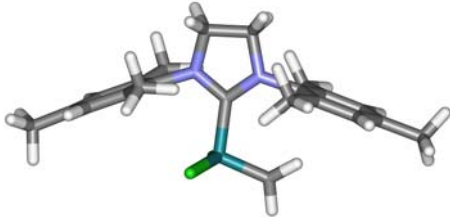     | <p>5-membered ring (-4.05)</p>                                                                                                                                                                                                                                                                                                                                                 | <p>6-membered ring (-4.54)</p>  |
| <p>7-membered ring (-4.38)</p>     | <p>8-membered ring (-4.30)</p>                                                                                                                                                                                                                                                                                                                                                | <p>9-membered ring (-4.45)</p>  |
| <p>10-membered ring (-3.98)</p>  | <p><b>Individual complexes (M06L/B2 geometries)</b></p> <p>All energies (<math>G_{rel}</math>) given are free energies (<math>\text{kcal mol}^{-1}</math>, dichloromethane, 298K) normalised in each case to the sum of the precursor diene and methylidene complex (2) (see manuscript <b>Table 1</b>). Only the complexes referred to explicitly in the text, or located on the full reaction profiles based on the lowest energy conformers are included.</p> |                                                                                                                    |

**AB<sup>‡</sup>-Transition structures (initial cyclisation transition structures)<sup>a</sup>**

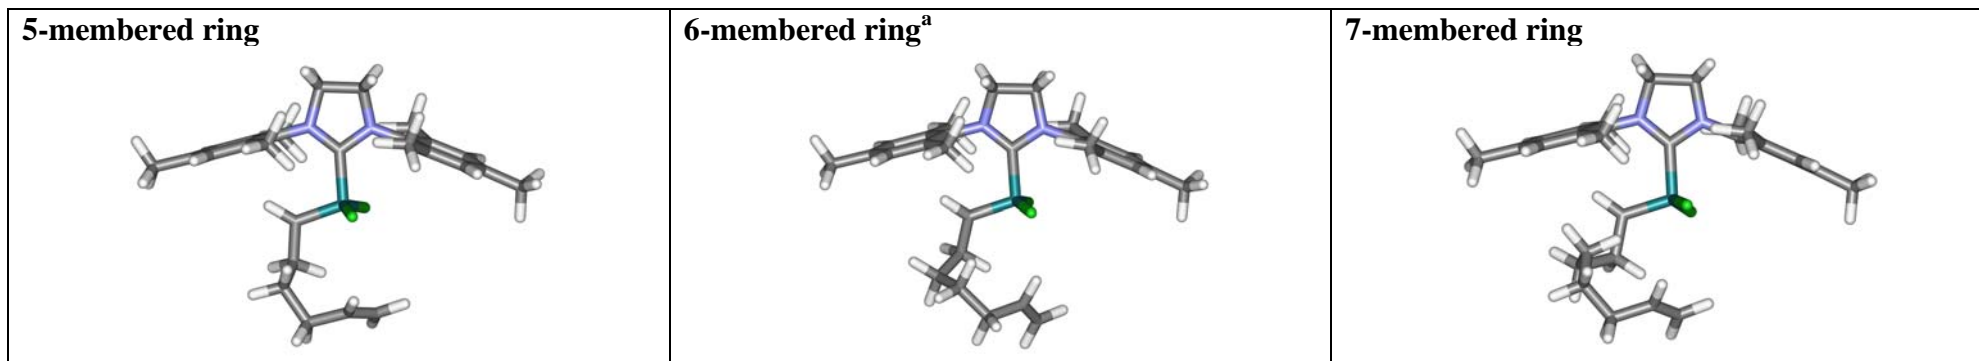

<sup>a</sup>The Structures are displayed in the opposite convention to the **A** complexes so that the tether can be seen more clearly.

<sup>b</sup>The conformation (half-chair or twisted boat) cannot be assigned.



## B-Complexes (initial $\eta^2$ -complexes)

|                                                                                                                                     |                                                                                                                                              |                                                                                                                                   |
|-------------------------------------------------------------------------------------------------------------------------------------|----------------------------------------------------------------------------------------------------------------------------------------------|-----------------------------------------------------------------------------------------------------------------------------------|
| <b>Template structure</b><br>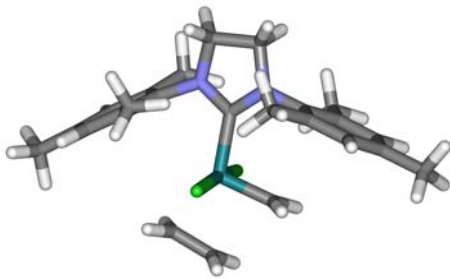                      | <b>5-membered ring (-15.53)</b><br>                        | <b>6-membered ring (half-chair) (-9.1)</b><br> |
| <b>6-membered ring (twisted boat) (-11.13)</b><br> | <b>6-membered ring (alternate half-chair) (-7.51)</b><br> | <b>7-membered ring (-12.04)</b><br>            |
| <b>8-membered ring (-9.45)</b><br>               | <b>9-membered ring (-5.20)</b><br>                       | <b>10-membered ring (-8.42)</b><br>          |

**BC<sup>‡</sup>-Transition structures (metallocyclobutane transition structures)**

|                                                                                                                          |                                                                                                                                 |                                                                                                                             |
|--------------------------------------------------------------------------------------------------------------------------|---------------------------------------------------------------------------------------------------------------------------------|-----------------------------------------------------------------------------------------------------------------------------|
| <p><b>5-membered ring (-12.10)</b></p> 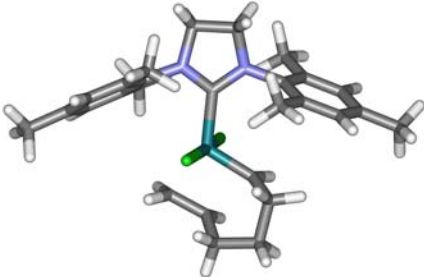 | <p><b>6-membered ring (boat) (-8.67)</b></p>  | <p><b>7-membered ring (-6.55)</b></p>    |
| <p><b>8-membered ring (-4.07)</b></p>  | <p><b>9-membered ring (+0.94)</b></p>        | <p><b>10-membered ring (+0.07)</b></p>  |

### C-Complex structures (metallocyclobutane structures)

|                                                                                                                                                                                                                                                                                                                                                                                            |                                                                                                                                                                                                                                                                                                                                                                 |                                                                                                                                                                                                                                                                                                                                                                           |
|--------------------------------------------------------------------------------------------------------------------------------------------------------------------------------------------------------------------------------------------------------------------------------------------------------------------------------------------------------------------------------------------|-----------------------------------------------------------------------------------------------------------------------------------------------------------------------------------------------------------------------------------------------------------------------------------------------------------------------------------------------------------------|---------------------------------------------------------------------------------------------------------------------------------------------------------------------------------------------------------------------------------------------------------------------------------------------------------------------------------------------------------------------------|
| <p>Template structure</p> 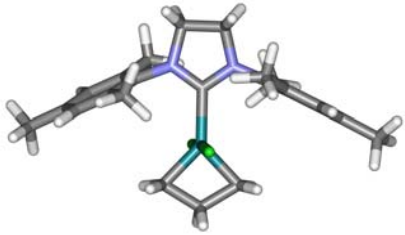 The template structure shows a central metal atom (green) coordinated to two nitrogen atoms (blue) of a five-membered ring. Two ethyl groups are attached to the ring. A cyclobutane ring is positioned below the metal center, with one carbon atom coordinated to the metal. | <p>5-membered ring (-14.13)</p>  The structure shows the cyclobutane ring fused to the five-membered ring, sharing two carbon atoms. The metal center is coordinated to the two nitrogen atoms and one carbon of the cyclobutane ring.                                        | <p>6-membered ring (half-chair) (-12.65)</p>  The structure shows the cyclobutane ring fused to the five-membered ring, sharing two carbon atoms. The metal center is coordinated to the two nitrogen atoms and two carbon atoms of the cyclobutane ring, forming a six-membered ring. |
| <p>6-membered ring (boat) (-14.75)</p>  The structure shows the cyclobutane ring fused to the five-membered ring, sharing two carbon atoms. The metal center is coordinated to the two nitrogen atoms and two carbon atoms of the cyclobutane ring, forming a six-membered ring in a boat conformation.   | <p>7-membered ring (-12.98)</p>  The structure shows the cyclobutane ring fused to the five-membered ring, sharing two carbon atoms. The metal center is coordinated to the two nitrogen atoms and three carbon atoms of the cyclobutane ring, forming a seven-membered ring. | <p>8-membered ring (-8.96)</p>  The structure shows the cyclobutane ring fused to the five-membered ring, sharing two carbon atoms. The metal center is coordinated to the two nitrogen atoms and four carbon atoms of the cyclobutane ring, forming an eight-membered ring.           |
| <p>9-membered ring (-5.3)</p>  The structure shows the cyclobutane ring fused to the five-membered ring, sharing two carbon atoms. The metal center is coordinated to the two nitrogen atoms and five carbon atoms of the cyclobutane ring, forming a nine-membered ring.                               | <p>10-membered ring (-4.14)</p>  The structure shows the cyclobutane ring fused to the five-membered ring, sharing two carbon atoms. The metal center is coordinated to the two nitrogen atoms and six carbon atoms of the cyclobutane ring, forming a ten-membered ring.   |                                                                                                                                                                                                                                                                                                                                                                           |

**CD<sup>‡</sup>-Transition structures (metallocyclobutane transition structures)**

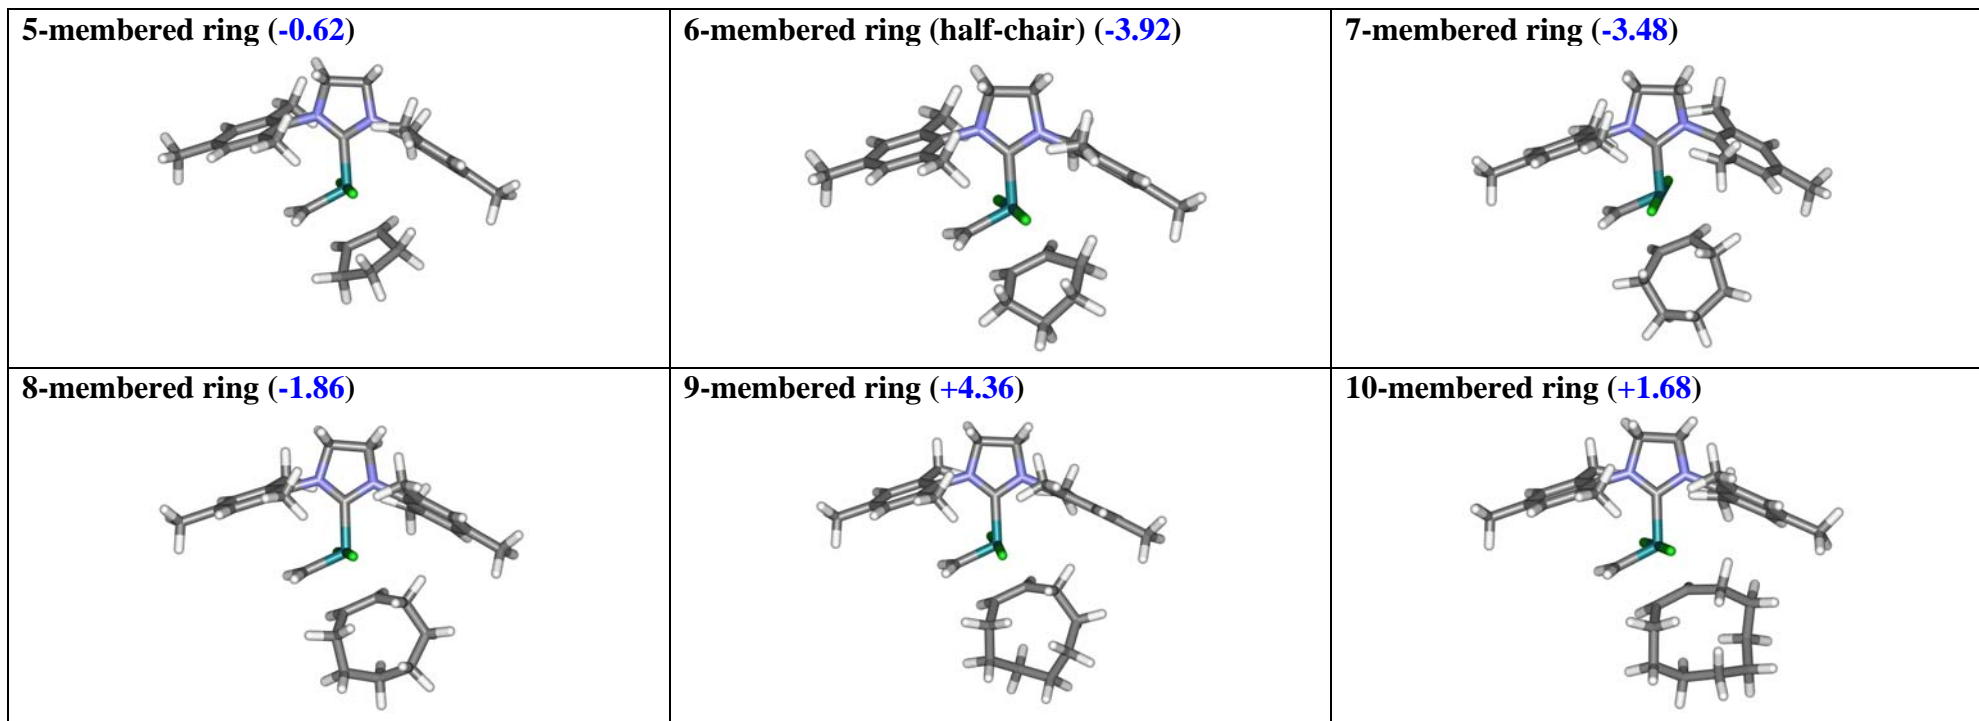

## D-Complex structures (product $\eta^2$ -complexes)

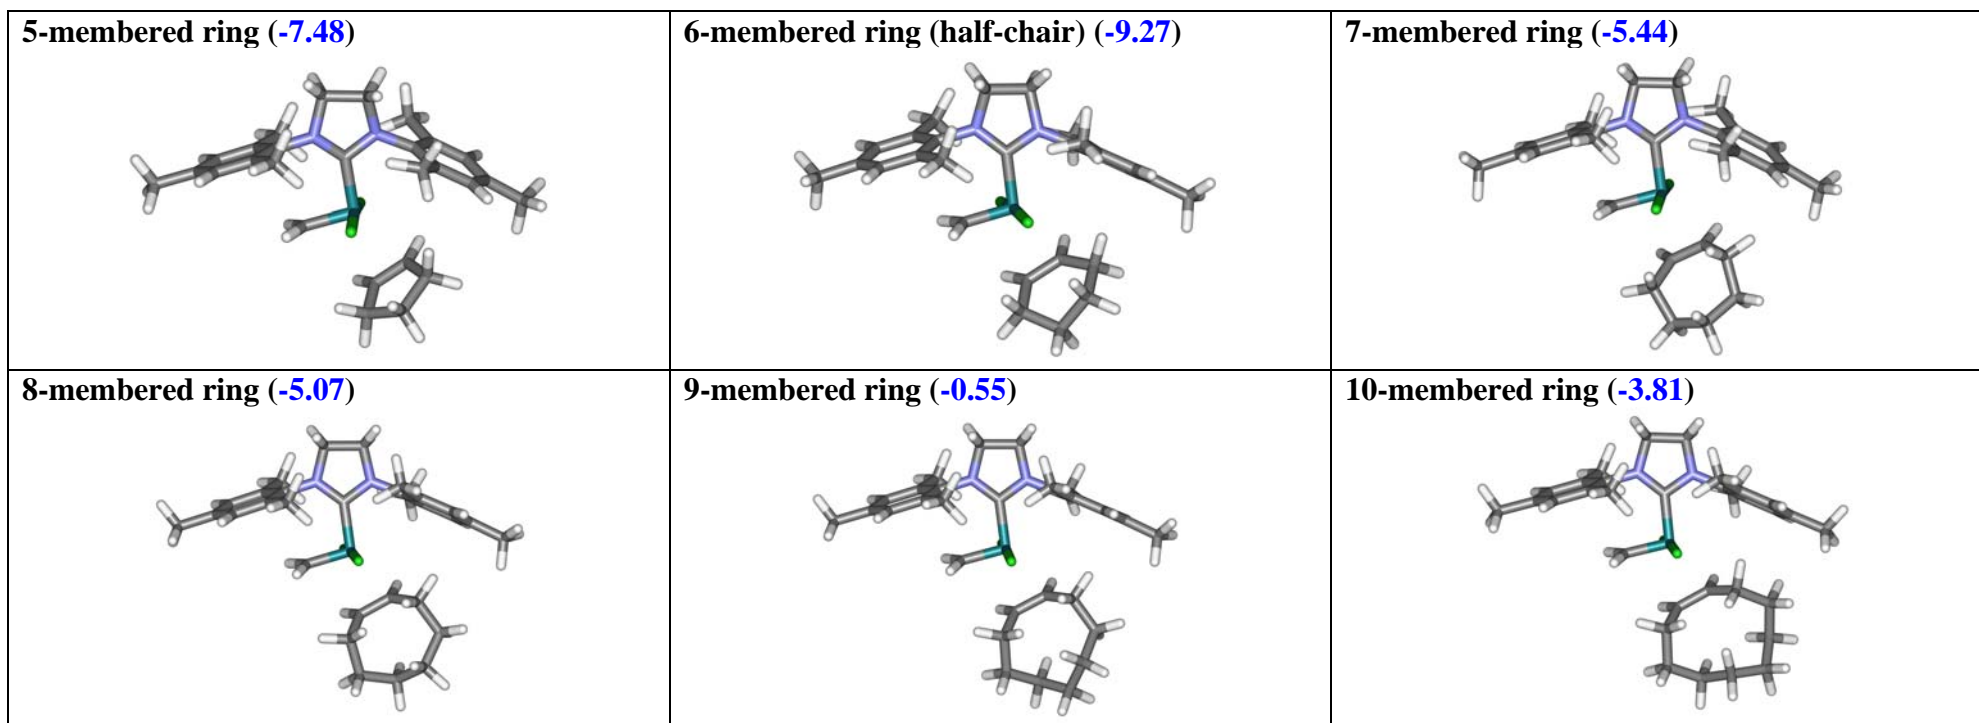

Supplement: c0dt01314e.pdf [file c0dt01314e.pdf]
